# Supplementary material for: ZMYM3 mutations modulate histone acetylation and cooperate with NOTCH1 mutations in chronic lymphocytic leukemia
Source: Research Square preprint supplement (doi:10.21203/rs.3.rs-7849174/v1), 2025-10-29
Supplement: Supplementary file 1 [file 4c5fbbfa7baddafc2d7d7f5a.xlsx]

## Sheet: Sup. Tables
SUPPLEMENTARY TABLES
Supplementary table S5. Biological characteristics of CLL primary samples used for the ex vivo experiments
Supplementary Table S6. Pathways enriched identified by GSEA in the database Reactome in ZMYM3MUT cells vs WT (1); ZMYM3MUT NOTCH1MUT cells vs WT (2) and ZMYM3MUT NOTCH1MUT cells vs NOTCH1MUT cells (3)
Supplementary table S7. Genes significantly enriched in gene sets of histone acetylation and deacetylation of Reactome identied by GSEA
Supplementary Table S8. Open chromatin regions identified by ATAC-seq for each condition
Supplementary Table S9. Genes associated with WT exclusive ATAC-seq peaks downregulated in ZMYM3MUT NOTCH1MUT cells

## Sheet: Sup. Table S5
Supplementary table S5. Biological characteristics of CLL primary samples used for the ex vivo experiments.
CONTROL GROUP											ZMYM3MUT GROUP
Sample ID	IGHV status	del(13q)	del(11q)	del(17p)	tri(12)	Mutated genes	Subclonal Mutations	Experiments	Drug screening		Sample ID	IGHV status	del(13q)	del(11q)	del(17p)	tri(12)	Mutated genes (% VAF)	Subclonal Mutations	Experiments	Drug screening
ID-01	UM	No	No	No	Yes	NOTCH1, ATRX	BRAF, DDX3X, SETD2	Drugs	Ibrutinib, Venetoclax, Idelalisib, Acalabrutinib, Duvelisib		ID-92	UM	Yes	No	Yes	Yes	MED12 (28.9), TP53 (17.1), BRAF (11.7), BAZ2A (15.4), ZC3H18 (22.9), ZMYM3 (12.8)	NOTCH1 (1.3)	RNA-sequencing, Drugs	Ibrutinib, Fludarabine, Venetoclax, Idelalisib, Acalabrutinib, Duvelisib
ID-02	M	Yes	No	No	No	TP53, CCND2, CHD2	ARID1B	Drugs	Ibrutinib, Venetoclax, Idelalisib, Acalabrutinib, Duvelisib		ID-93	UM	No	No	No	No	ZMYM3 (51.9), EGR2 (24.5), RPS23 (6.3)	0	RNA-sequencing, drugs, ddPCR	Ibrutinib, Fludarabine, Venetoclax, Idelalisib, Acalabrutinib, Duvelisib
ID-03	UM	Yes	Yes	No	No	SF3B1, TP53, FAT1, MGA	0	Drugs	Ibrutinib, Venetoclax, Idelalisib, Acalabrutinib, Duvelisib		ID-94		Yes	No	No	No	NOTCH1 (p.P2514fs, 43.8), RPS15 (42.6), ZMYM3 (15.1)	ZMYM3 (1.7)	Drugs, ddPCR, Histone H4 Acetylation	Ibrutinib, Fludarabine, Venetoclax, Idelalisib, Acalabrutinib, Duvelisib, A1331852
ID-04	UM	Yes	No	No	No	XPO1, DDX3X	ATRX	Drugs	Ibrutinib, Venetoclax, Idelalisib, Acalabrutinib, Duvelisib		ID-95	UM	Yes	No	No	No	SF3B1 (45.6), NOTCH1 (p.P2514fs, 47.5, p.R2272C, 37.1), ATM (50.6), ZMYM3 (51.5)	TP53 (2.7,1.4)	Drugs, ddPCR	Co-culture: Ibrutinib, Fludarabine, Venetoclax, Idelalisib, Acalabrutinib, Duvelisib
ID-05	UM	No	Yes	No	Yes	KRAS	0	Drugs	Ibrutinib, Venetoclax, Idelalisib, Acalabrutinib, Duvelisib		ID-96	UM	No	No	Yes	Yes	SPEN (37.4; 38.8), ZMYM3 (18.7), SF3B1 (8.4), TP53 (5.6)	BIRC3 (3.4;1.4), MAP3K14 (3.6)	RNA-sequencing, drugs, ddPCR, Histone H4 Acetylation	Ibrutinib, Fludarabine, Venetoclax, Idelalisib, Acalabrutinib, Duvelisib, A1331852
ID-06	UM	Yes	Yes	Yes	No	ATM, SAMHD1, SPEN, ZNF292	0	Drugs	Ibrutinib, Venetoclax, Idelalisib, Acalabrutinib, Duvelisib		ID-97	UM	Yes	No	Yes	Yes	TP53 (6.1), FBXW7 (6.5), NOTCH1 (p.P2514fs, 5.3), ZMYM3 (7.1), FUBP1 (7.9), CHD2 (6.9)	ZMYM3 (4.3), KRAS (3.7), ATM (3.5), BIRC3 (3.4), NXF1 (2.7,1.3)	RNA-sequencing, drugs, ddPCR, Histone H4 Acetylation	Ibrutinib, Fludarabine, Venetoclax, Idelalisib, Acalabrutinib, Duvelisib, A1331852
ID-07	UM	No	Yes	No	Yes	BRAF	0	Drugs	Ibrutinib, Venetoclax, Idelalisib, Acalabrutinib, Duvelisib		ID-98	UM	NR	Yes	No	NR	BIRC3 (62.3), XPO1 (44.8), NOTCH1 (36.0), CHD2 (39.3), SETD2 (39.3), ZMYM3 (46.9)	ZNF292 (3.37)	RNA-sequencing, drugs, ddPCR, Histone H4 Acetylation	Ibrutinib, Fludarabine, Venetoclax, Idelalisib, Acalabrutinib, Duvelisib, A1331852
ID-08	UM	Yes	No	No	No	KRAS, ZC3H18	MAP2K1, BRAF	Drugs	Ibrutinib, Venetoclax, Idelalisib, Acalabrutinib, Duvelisib		ID-99	M	Yes	No	No	No	ATM (39.4), CHD2 (41.9)	ZMYM3 (4.0), RPS15 (4.4)	Drugs, ddPCR	Ibrutinib, A1331852
ID-09	UM	Yes	Yes	No	No	ATM, RPS15	TP53	Drugs	Ibrutinib, Venetoclax, Idelalisib, Acalabrutinib, Duvelisib		ID-100		No	No	No	Yes	ZMYM3 (82.2)		Drugs, ddPCR, Histone H4 Acetylation	Ibrutinib (co-culture), Fludarabine, Venetoclax (monoculture), Acalabrutinib (co-culture)
ID-10	UM	NR	NR	No	NR	ATM	0	Drugs	Ibrutinib, Venetoclax, Idelalisib, Acalabrutinib, Duvelisib
ID-11	UM	Yes	Yes	No	No	0	TP53	Drugs	Ibrutinib, Venetoclax, Idelalisib, Acalabrutinib, Duvelisib
ID-12	UM	Yes	Yes	No	No	ARID1B, NOTCH1, ATM	0	Drugs	Ibrutinib, Idelalisib, Acalabrutinib, Duvelisib
ID-13	UM	No	Yes	No	No	EGR2, SETD2	SPEN	Drugs	Ibrutinib, Idelalisib, Acalabrutinib, Duvelisib
ID-14	UM	Yes	Yes	No	No	SF3B1, MAP2K1, BIRC3 (2), BCOR	0	Drugs	Ibrutinib, Idelalisib, Acalabrutinib, Duvelisib
ID-15	UM	No	Yes	No	No	RPS15	SF3B1, DDX3X	Drugs	Ibrutinib, Idelalisib, Acalabrutinib, Duvelisib
ID-16		Yes	Yes	No	No	ATM (2)	0	Drugs	Ibrutinib, Idelalisib, Acalabrutinib, Duvelisib
ID-17		Yes	Yes	No	No	DDX3X	BIRC3	Drugs	Ibrutinib, Idelalisib, Acalabrutinib, Duvelisib
ID-18		Yes	Yes	No	No	POT1, SAMHD1, ZC3H18	MYD88	Drugs	Ibrutinib, Idelalisib, Acalabrutinib, Duvelisib
ID-19	M	Yes	Yes	No	No	ATM (3)	RPS15	Drugs	Ibrutinib, Idelalisib, Acalabrutinib, Duvelisib
ID-20	UM	No	Yes	No	No	SF3B1, PTPN11, BRAF, NOTCH1, ATM	0	Drugs	Ibrutinib, Idelalisib, Acalabrutinib, Duvelisib
ID-21	UM	No	Yes	No	No	SF3B1, PTPN11, BRAF, NOTCH1, ATM	0	Drugs	Ibrutinib, Idelalisib, Acalabrutinib, Duvelisib
ID-22		Yes	Yes	No	Yes	ATM, IRF4, NOTCH1	NFKBIE	Drugs	Ibrutinib, Idelalisib, Acalabrutinib, Duvelisib
ID-23		Yes	Yes	No	Yes	ATM, IRF4, NOTCH1	NFKBIE	Drugs	Ibrutinib, Idelalisib, Acalabrutinib, Duvelisib
ID-24	M	Yes	No	No	No	ASXL1	0	Drugs	Ibrutinib, Fludarabine, Venetoclax, Idelalisib, Acalabrutinib, Duvelisib
ID-25	M	Yes	No	No	Yes	IGLL5, DDX3X	0	Drugs	Ibrutinib, Fludarabine, Venetoclax, Idelalisib, Acalabrutinib, Duvelisib
ID-26		Yes	No	No	No	MYD88, ATM, POT1, NXF1	NXF1, BRAF, KRAS	Drugs	Ibrutinib, Fludarabine, Venetoclax, Idelalisib, Acalabrutinib, Duvelisib
ID-27	UM	No	No	No	Yes	NOTCH1	0	Drugs	Ibrutinib, Fludarabine, Venetoclax, Idelalisib, Acalabrutinib, Duvelisib
ID-28	UM	Yes	No	No	No	NOTCH1, XPO1, MGA (2), FAM50A	NXF1	Drugs	Ibrutinib, Fludarabine, Venetoclax, Idelalisib, Acalabrutinib, Duvelisib
ID-29		Yes	No	No	Yes	MAP3K14, ATRX	BIRC3 (3), NFKBIE	Drugs	Ibrutinib, Fludarabine, Venetoclax, Idelalisib, Acalabrutinib, Duvelisib
ID-30	UM	Yes	Yes	No	No	ATM, IKZF3	NFKBIE	Drugs	Ibrutinib, Fludarabine, Venetoclax, Idelalisib, Acalabrutinib, Duvelisib
ID-31	UM	No	No	Yes	No	TP53, DMD	0	Drugs	Ibrutinib, Fludarabine, Venetoclax, Idelalisib, Acalabrutinib, Duvelisib
ID-32	M	Yes	No	No	No	KLHL6	KRAS	Drugs	Ibrutinib, Fludarabine, Venetoclax, Idelalisib, Acalabrutinib, Duvelisib
ID-33	UM	Yes	Yes	No	No	ATM, NFKBIE	0	Drugs	Ibrutinib, Fludarabine, Venetoclax, Idelalisib, Acalabrutinib, Duvelisib
ID-34	UM	No	No	No	No	NOTCH1, MGA	BCOR, PTPN11	Drugs	Ibrutinib, Fludarabine, Venetoclax, Idelalisib, Acalabrutinib, Duvelisib
ID-35	UM	No	No	No	Yes	FBXW7 (4)	FBXW7 (4)	RNA-sequencing, drugs	Ibrutinib, Fludarabine, Venetoclax, Idelalisib, Acalabrutinib, Duvelisib
ID-36	UM	No	No	No	No	ATM, BRAF (2), MAP2K1	PTPN11 (2), EGR2, MAP2K1	RNA-sequencing, drugs, ddPCR	Ibrutinib, Fludarabine, Venetoclax, Idelalisib, Acalabrutinib, Duvelisib
ID-37	UM	No	Yes	No	No	NOTCH1, BRAF	0	Drugs	Ibrutinib, Fludarabine, Venetoclax, Idelalisib, Acalabrutinib, Duvelisib
ID-38	UM	Yes	No	No	No	NOTCH1, XPO1	NRAS	Drugs	Ibrutinib, Fludarabine, Venetoclax, Idelalisib, Acalabrutinib, Duvelisib
ID-39	UM	No	No	No	No	SF3B1, NOTCH1	NOTCH1	Drugs	Ibrutinib, Fludarabine, Venetoclax, Idelalisib, Acalabrutinib, Duvelisib
ID-40	UM	No	Yes	No	No	SF3B1	0	Drugs	Ibrutinib, Fludarabine, Venetoclax, Idelalisib, Acalabrutinib, Duvelisib
ID-41	M	Yes	No	No	Yes	0	0	Drugs	Ibrutinib, Fludarabine, Venetoclax, Idelalisib, Acalabrutinib, Duvelisib
ID-42	UM	No	No	No	No	SAMHD1 (2), NOTCH1, MGA (2), ASXL1	EGR2	Drugs	Ibrutinib, Fludarabine, Venetoclax, Idelalisib, Acalabrutinib, Duvelisib
ID-43	UM	No	No	No	Yes	KRAS, NOTCH1, MED12, POT1, CSMD1	0	Drugs	Ibrutinib, Fludarabine, Venetoclax, Idelalisib, Acalabrutinib, Duvelisib
ID-44		No	No	No	Yes	HIST1H1E, NFKBIE, KRAS, IGLL5	KLHL6	Drugs	Ibrutinib, Fludarabine, Venetoclax, Idelalisib, Acalabrutinib, Duvelisib
ID-45	UM	No	No	No	Yes	SAMHD1 (2), SF3B1, MED12	KRAS	RNA-sequencing, drugs	Ibrutinib, Fludarabine, Venetoclax, Idelalisib, Acalabrutinib, Duvelisib
ID-46	M	NR	NR	NR	Yes	TRAF3 (2), KLHL6 (3), IGLL5 (5)	NOTCH1	Drugs	Ibrutinib, Fludarabine, Venetoclax, Idelalisib, Acalabrutinib, Duvelisib
ID-47	UM	NR	Yes	No	NR	ATM, SF3B1, DDX3X	0	Drugs	Ibrutinib, Fludarabine, Venetoclax, Idelalisib, Acalabrutinib, Duvelisib
ID-48		NR	Yes	No	NR	ATM, SF3B1, ZC3H18	ARID1A	Drugs	Ibrutinib, Fludarabine, Venetoclax, Idelalisib, Acalabrutinib, Duvelisib
ID-49	UM	NR	Yes	No	NR	ATM (3)	ATM (1)	Drugs	Ibrutinib, Fludarabine, Venetoclax, Idelalisib, Acalabrutinib, Duvelisib
ID-50	UM	Yes	Yes	No	No	TRAF3	0	Drugs	Ibrutinib, Fludarabine, Venetoclax, Idelalisib, Acalabrutinib, Duvelisib
ID-51	UM	Yes	No	No	No	SF3B1, RPS15 (1), MED12	NOTCH1, RPS15 (1)	Drugs	Ibrutinib, Fludarabine, Venetoclax, Idelalisib, Acalabrutinib, Duvelisib
ID-52	UM	No	No	Yes	Yes	TP53, BRAF, NFKBIE, RPS23	USP28	Drugs	Ibrutinib (Co-culture), Fludarabine (Co-culture), Venetoclax (Co-culture), Idelalisib (Co-culture), Acalabrutinib (Co-culture), Duvelisib (Co-culture)
ID-53		No	Yes	No	No	NOTCH1	0	Drugs	Ibrutinib (Co-culture), Fludarabine (Co-culture), Venetoclax (Co-culture), Idelalisib (Co-culture), Acalabrutinib (Co-culture), Duvelisib (Co-culture)
ID-54	UM	No	No	No	Yes	NFKBIE, BIRC3, NXF1	BIRC3	Drugs	Ibrutinib (Co-culture), Fludarabine (Co-culture), Venetoclax (Co-culture), Idelalisib (Co-culture), Acalabrutinib (Co-culture), Duvelisib (Co-culture)
ID-55	M	No	No	No	No	0	SF3B1	Drugs	Ibrutinib, Fludarabine, Venetoclax, Idelalisib, Acalabrutinib, Duvelisib
ID-56	UM	No	Yes	No	No	POT1 (2)	0	Drugs	Ibrutinib, Fludarabine, Venetoclax, Idelalisib, Acalabrutinib, Duvelisib
ID-57		No	No	No	No	ZNF292 (11.3)	CHD2 (2)	Drugs, Histone H4 Acetylation, ddPCR	Ibrutinib, Fludarabine, Venetoclax, Idelalisib, Acalabrutinib, Duvelisib
ID-58	UM	No	No	No	No	POT1, HIST1H1B, ZNF292	CARD11, NFKBIE	Drugs	Ibrutinib (Co-culture), Fludarabine (Co-culture), Venetoclax (Co-culture), Idelalisib (Co-culture), Acalabrutinib (Co-culture), Duvelisib (Co-culture)
ID-59	UM	No	No	No	No	BAX, ZFHX3, POT1	ATM (2 mut), IKZF3	Drugs	Ibrutinib (Co-culture), Fludarabine (Co-culture), Venetoclax (Co-culture), Idelalisib (Co-culture), Acalabrutinib (Co-culture), Duvelisib (Co-culture)
ID-60	UM	Yes	Yes	No	No	NFKBIE, FUBP1	ZNF292	Drugs	Ibrutinib (Co-culture), Fludarabine (Co-culture), Venetoclax (Co-culture), Idelalisib (Co-culture), Acalabrutinib (Co-culture), Duvelisib (Co-culture)
ID-61	UM	No	Yes	No	No	ATM, RPS15, CSMD1	0	Drugs	Ibrutinib (Co-culture), Fludarabine (Co-culture), Venetoclax (Co-culture), Idelalisib (Co-culture), Acalabrutinib (Co-culture), Duvelisib (Co-culture)
ID-62	UM	No	No	No	No	SF3B1	0	Drugs	Ibrutinib (Co-culture), Fludarabine (Co-culture), Venetoclax (Co-culture), Idelalisib (Co-culture), Acalabrutinib (Co-culture), Duvelisib (Co-culture)
ID-63	UM	Yes	No	No	No	DDX3X, MED12, FGFR1, FAM50A	MGA, TP53	Drugs	Ibrutinib (Co-culture), Fludarabine (Co-culture), Venetoclax (Co-culture), Idelalisib (Co-culture), Acalabrutinib (Co-culture), Duvelisib (Co-culture)
ID-64		Yes	No	No	No			Drugs	Ibrutinib, Fludarabine, Venetoclax, Idelalisib, Acalabrutinib, Duvelisib
ID-65		No	No	No	No	XPO1, SF3B1, TP53	0	Drugs	Ibrutinib, Fludarabine, Venetoclax, Idelalisib, Acalabrutinib, Duvelisib
ID-66	UM	No	Yes	No	No	ATM	SF3B1, DDX3X	Drugs	Ibrutinib (Co-culture), Fludarabine (Co-culture), Venetoclax (Co-culture), Idelalisib (Co-culture), Acalabrutinib (Co-culture), Duvelisib (Co-culture)
ID-67	UM	Yes	Yes	No	No	HIST1H1E, NFKBIE, NXF1, TP53	0	Drugs	Ibrutinib (Co-culture), Fludarabine (Co-culture), Venetoclax (Co-culture), Idelalisib (Co-culture), Acalabrutinib (Co-culture), Duvelisib (Co-culture)
ID-68	UM	No	No	No	No	CHD2, IKZF3	0	Drugs	Ibrutinib, Fludarabine, Venetoclax, Idelalisib, Acalabrutinib, Duvelisib
ID-69	UM	No	No	No	No	NOTCH1	NOTCH1	Drugs	Ibrutinib, Fludarabine, Venetoclax, Idelalisib, Acalabrutinib, Duvelisib
ID-70		No	No	No	Yes	SPEN	0	Drugs	Ibrutinib, Fludarabine, Venetoclax, Idelalisib, Acalabrutinib, Duvelisib
ID-71	UM	No	No	No	Yes	NOTCH1, TP53, MAP3K14, BIRC3	0	RNA-sequencing, drugs	Ibrutinib, Fludarabine, Venetoclax, Idelalisib, Acalabrutinib, Duvelisib
ID-72	UM	Yes	No	No	No			Drugs, ddPCR	Ibrutinib, Fludarabine, Venetoclax, Idelalisib, Acalabrutinib, Duvelisib
ID-73	UM	No	No	No	No	NOTCH1, ATM, MGA, IKZF3, MED12	XPO1, NFKBIE	RNA-sequencing, drugs	Ibrutinib, Fludarabine, Venetoclax, Idelalisib, Acalabrutinib, Duvelisib
ID-74	UM	No	No	No	Yes	NOTCH1, BCOR	BIRC3	Drugs	Ibrutinib, Fludarabine, Venetoclax, Idelalisib, Acalabrutinib, Duvelisib
ID-75		No	No	No	Yes			Drugs	Ibrutinib, Fludarabine, Venetoclax, Idelalisib, Acalabrutinib, Duvelisib
ID-76	M	Yes	No	No	No	ATM, MRE11A	0	Drugs	Ibrutinib, Fludarabine, Venetoclax, Idelalisib, Acalabrutinib, Duvelisib
ID-77		Yes	Yes	No	No	ATM, ARID1A, HIST1H1E	0	Drugs	Ibrutinib, Fludarabine, Venetoclax, Idelalisib, Acalabrutinib, Duvelisib
ID-78	UM	Yes	Yes	No	No			Drugs	Ibrutinib, Fludarabine, Venetoclax, Idelalisib, Acalabrutinib, Duvelisib
ID-79	UM	Yes	Yes	No	No	ATM, NXF1	0	Drugs	Ibrutinib, Fludarabine, Venetoclax, Idelalisib, Acalabrutinib, Duvelisib
ID-80	UM	Yes	No	No	No			Drugs	Ibrutinib, Fludarabine, Venetoclax, Idelalisib, Acalabrutinib, Duvelisib
ID-81	M	Yes	No	No	No			Drugs	Ibrutinib, Fludarabine, Venetoclax, Idelalisib, Acalabrutinib, Duvelisib
ID-82		No	No	No	Yes	ATM, TRAF3	0	Drugs	Ibrutinib, Fludarabine, Venetoclax, Idelalisib, Acalabrutinib, Duvelisib
ID-83		Yes	No	Yes	No			Drugs	Ibrutinib, Fludarabine, Venetoclax, Idelalisib, Acalabrutinib, Duvelisib
ID-84	UM	Yes	Yes	No	No			Drugs	Ibrutinib, Fludarabine, Venetoclax, Idelalisib, Acalabrutinib, Duvelisib
ID-85	UM	No	No	No	No			Drugs	Ibrutinib, Fludarabine, Venetoclax, Idelalisib, Acalabrutinib, Duvelisib
ID-86	-	Yes	No	No	No	0		Drugs, Histone H4 Acetylation, ddPCR	Ibrutinib, Fludarabine, Venetoclax, Idelalisib, Acalabrutinib, Duvelisib, A1331852
ID-87	UM	Yes	No	No	No	0		Drugs, Histone H4 Acetylation	Ibrutinib, Fludarabine, Venetoclax, Idelalisib, Acalabrutinib, Duvelisib, A1331852
ID-88	UM	Yes	No	No	No	Undetermined		Drugs, Histone H4 Acetylation, ddPCR	Ibrutinib, Fludarabine, Venetoclax, Idelalisib, Acalabrutinib, Duvelisib, A1331852
ID-89		Yes	No	No	No	Undetermined		Drugs, Histone H4 Acetylation, ddPCR	Ibrutinib, Fludarabine, Venetoclax, Idelalisib, Acalabrutinib, Duvelisib, A1331852
ID-90	M	Yes	No	No	No	Undetermined		Drugs, Histone H4 Acetylation, ddPCR	Ibrutinib, Fludarabine, Venetoclax, Idelalisib, Acalabrutinib, Duvelisib, A1331852
ID-91	UM	No	No	No	No	Undetermined		Drugs, Histone H4 Acetylation, ddPCR	Ibrutinib, Fludarabine, Venetoclax, Idelalisib, Acalabrutinib, Duvelisib, A1331852

## Sheet: Sup. Table S6
Supplementary Table S6. Pathways enriched identified by GSEA in the database Reactome in CRISPR/Cas9-edited HG3 cells: ZMYM3MUT cells vs WT (1); ZMYM3MUT NOTCH1MUT cells vs WT (2) and ZMYM3MUT NOTCH1MUT cells vs NOTCH1MUT cells (3).
Comparation 1: ZMYM3MUT vs WT
		GS DETAILS	SIZE	ES	NES	NOM p-val	FDR q-val				GS DETAILS	SIZE	ES	NES	NOM p-val	FDR q-val
	1	REACTOME_SIGNALING_BY_HIPPO	17	0.84	1.79	0	0.272			1	REACTOME_PROTEIN_FOLDING	78	-0.65	-1.66	0.003	0.69
	2	REACTOME_HDACS_DEACETYLATE_HISTONES	75	0.6	1.68	0	0.718			2	REACTOME_JNK_C_JUN_KINASES_PHOSPHORYLATION_AND_ACTIVATION_MEDIATED_BY_ACTIVATED_HUMAN_TAK1	22	-0.8	-1.66	0	0.372
	3	REACTOME_HATS_ACETYLATE_HISTONES	123	0.53	1.62	0.004	0.93			3	REACTOME_IMMUNOREGULATORY_INTERACTIONS_BETWEEN_A_LYMPHOID_AND_A_NON_LYMPHOID_CELL	79	-0.67	-1.66	0	0.26
	4	REACTOME_SIGNALING_BY_ERBB2	42	0.62	1.59	0.006	0.957			4	REACTOME_PEPTIDE_LIGAND_BINDING_RECEPTORS	67	-0.67	-1.65	0.001	0.233
	5	REACTOME_HCMV_LATE_EVENTS	95	0.55	1.58	0.007	0.874			5	REACTOME_SIGNALING_BY_NOTCH3	40	-0.71	-1.64	0.003	0.213
	6	REACTOME_EUKARYOTIC_TRANSLATION_ELONGATION	90	0.52	1.54	0	1000			6	REACTOME_INTERLEUKIN_3_INTERLEUKIN_5_AND_GM_CSF_SIGNALING	42	-0.7	-1.63	0.006	0.221
	7	REACTOME_SRP_DEPENDENT_COTRANSLATIONAL_PROTEIN_TARGETING_TO_MEMBRANE	111	0.52	1.53	0.007	0.996			7	REACTOME_CARBOXYTERMINAL_POST_TRANSLATIONAL_MODIFICATIONS_OF_TUBULIN	30	-0.75	-1.62	0	0.209
	8	REACTOME_METALLOPROTEASE_DUBS	30	0.65	1.52	0.031	1000			8	REACTOME_NR1H2_AND_NR1H3_MEDIATED_SIGNALING	34	-0.72	-1.62	0.005	0.186
	9	REACTOME_SIGNALING_BY_BMP	15	0.73	1.51	0.033	0.958			9	REACTOME_TRAF6_MEDIATED_INDUCTION_OF_TAK1_COMPLEX_WITHIN_TLR4_COMPLEX	15	-0.84	-1.62	0.003	0.188
	10	REACTOME_SIRT1_NEGATIVELY_REGULATES_RRNA_EXPRESSION	50	0.56	1.48	0.021	1000			10	REACTOME_INTERLEUKIN_10_SIGNALING	35	-0.72	-1.61	0.005	0.175
	11	REACTOME_ERCC6_CSB_AND_EHMT2_G9A_POSITIVELY_REGULATE_RRNA_EXPRESSION	58	0.54	1.47	0.019	1000			11	REACTOME_INTERFERON_ALPHA_BETA_SIGNALING	58	-0.66	-1.61	0.008	0.177
	12	REACTOME_SELENOAMINO_ACID_METABOLISM	112	0.49	1.47	0.016	0.992			12	REACTOME_COOPERATION_OF_PDCL_PHLP1_AND_TRIC_CCT_IN_G_PROTEIN_BETA_FOLDING	29	-0.74	-1.58	0.011	0.233
	13	REACTOME_B_WICH_COMPLEX_POSITIVELY_REGULATES_RRNA_EXPRESSION	73	0.52	1.47	0.007	0.923			13	REACTOME_PLASMA_LIPOPROTEIN_CLEARANCE	30	-0.73	-1.57	0.011	0.253
	14	REACTOME_EUKARYOTIC_TRANSLATION_INITIATION	118	0.49	1.47	0	0.87			14	REACTOME_CLASS_A_1_RHODOPSIN_LIKE_RECEPTORS	117	-0.59	-1.56	0	0.286
	15	REACTOME_CONDENSATION_OF_PROPHASE_CHROMOSOMES	55	0.54	1.46	0.013	0.826			15	REACTOME_AGGREPHAGY	33	-0.69	-1.55	0.011	0.315
	16	REACTOME_RECOGNITION_AND_ASSOCIATION_OF_DNA_GLYCOSYLASE_WITH_SITE_CONTAINING_AN_AFFECTED_PURINE	41	0.57	1.46	0.04	0.775			16	REACTOME_INACTIVATION_OF_CSF3_G_CSF_SIGNALING	24	-0.73	-1.55	0.016	0.311
	17	REACTOME_NONHOMOLOGOUS_END_JOINING_NHEJ	58	0.54	1.46	0.022	0.741			17	REACTOME_NOTCH3_INTRACELLULAR_DOMAIN_REGULATES_TRANSCRIPTION	19	-0.78	-1.54	0.017	0.295
	18	REACTOME_RNA_POLYMERASE_I_PROMOTER_ESCAPE	72	0.52	1.46	0.03	0.709			18	REACTOME_EPHA_MEDIATED_GROWTH_CONE_COLLAPSE	20	-0.76	-1.54	0.011	0.284
	19	REACTOME_POSITIVE_EPIGENETIC_REGULATION_OF_RRNA_EXPRESSION	88	0.5	1.45	0.011	0.709			19	REACTOME_O_LINKED_GLYCOSYLATION	66	-0.62	-1.52	0.007	0.348
	20	REACTOME_MEIOTIC_RECOMBINATION	64	0.54	1.45	0.028	0.679			20	REACTOME_THROMBIN_SIGNALLING_THROUGH_PROTEINASE_ACTIVATED_RECEPTORS_PARS	22	-0.74	-1.52	0.02	0.335
	21	REACTOME_MEIOSIS	88	0.51	1.44	0.014	0.683			21	REACTOME_TRAFFICKING_OF_AMPA_RECEPTORS	23	-0.73	-1.52	0.028	0.338
	22	REACTOME_TRANSCRIPTIONAL_REGULATION_BY_SMALL_RNAS	89	0.49	1.44	0.015	0.658			22	REACTOME_TRIGLYCERIDE_METABOLISM	23	-0.73	-1.51	0.008	0.336
	23	REACTOME_DEPOSITION_OF_NEW_CENPA_CONTAINING_NUCLEOSOMES_AT_THE_CENTROMERE	59	0.54	1.44	0.029	0.655			23	REACTOME_SIGNAL_AMPLIFICATION	20	-0.75	-1.51	0.016	0.347
	24	REACTOME_ASSEMBLY_OF_THE_ORC_COMPLEX_AT_THE_ORIGIN_OF_REPLICATION	51	0.55	1.43	0.041	0.638			24	REACTOME_CHEMOKINE_RECEPTORS_BIND_CHEMOKINES	30	-0.68	-1.51	0.026	0.346
	25	REACTOME_UCH_PROTEINASES	94	0.5	1.43	0.016	0.62			25	REACTOME_ANTIMICROBIAL_PEPTIDES	17	-0.78	-1.5	0.015	0.342
	26	REACTOME_RND1_GTPASE_CYCLE	37	0.57	1.43	0.055	0.602			26	REACTOME_MOLECULES_ASSOCIATED_WITH_ELASTIC_FIBRES	21	-0.74	-1.5	0.022	0.329
	27	REACTOME_ACTIVATED_PKN1_STIMULATES_TRANSCRIPTION_OF_AR_ANDROGEN_RECEPTOR_REGULATED_GENES_KLK2_AND_KLK3	48	0.53	1.43	0.04	0.582			27	REACTOME_INTERLEUKIN_RECEPTOR_SHC_SIGNALING	21	-0.73	-1.5	0.021	0.328
	28	REACTOME_MEIOTIC_SYNAPSIS	56	0.53	1.42	0.027	0.595			28	REACTOME_NR1H3_NR1H2_REGULATE_GENE_EXPRESSION_LINKED_TO_CHOLESTEROL_TRANSPORT_AND_EFFLUX	28	-0.7	-1.5	0.022	0.322
	29	REACTOME_INHIBITION_OF_DNA_RECOMBINATION_AT_TELOMERE	53	0.53	1.41	0.028	0.604			29	REACTOME_THROMBOXANE_SIGNALLING_THROUGH_TP_RECEPTOR	16	-0.76	-1.5	0.032	0.318
	30	REACTOME_RNA_POLYMERASE_I_TRANSCRIPTION	91	0.48	1.41	0.017	0.608			30	REACTOME_REGULATION_OF_SIGNALING_BY_CBL	21	-0.73	-1.49	0.021	0.319
	31	REACTOME_METABOLISM_OF_POLYAMINES	57	0.53	1.41	0.047	0.602			31	REACTOME_INTERLEUKIN_2_FAMILY_SIGNALING	36	-0.66	-1.49	0.021	0.338
	32	REACTOME_FORMATION_OF_THE_BETA_CATENIN_TCF_TRANSACTIVATING_COMPLEX	69	0.51	1.4	0.019	0.587			32	REACTOME_ADP_SIGNALLING_THROUGH_P2Y_PURINOCEPTOR_1	16	-0.76	-1.49	0.027	0.329
	33	REACTOME_DOWNSTREAM_SIGNAL_TRANSDUCTION	26	0.59	1.37	0.075	0.729			33	REACTOME_ADORA2B_MEDIATED_ANTI_INFLAMMATORY_CYTOKINES_PRODUCTION	28	-0.68	-1.48	0.025	0.329
	34	REACTOME_BASE_EXCISION_REPAIR	76	0.48	1.36	0.021	0.728			34	REACTOME_SENSORY_PROCESSING_OF_SOUND_BY_OUTER_HAIR_CELLS_OF_THE_COCHLEA	38	-0.66	-1.48	0.021	0.321
	35	REACTOME_BASE_EXCISION_REPAIR_AP_SITE_FORMATION	48	0.51	1.36	0.047	0.732			35	REACTOME_ELASTIC_FIBRE_FORMATION	25	-0.71	-1.48	0.028	0.313
	36	REACTOME_SARS_COV_1_MODULATES_HOST_TRANSLATION_MACHINERY	37	0.55	1.35	0.086	0.765			36	REACTOME_IKK_COMPLEX_RECRUITMENT_MEDIATED_BY_RIP1	22	-0.72	-1.47	0.028	0.346
	37	REACTOME_SIGNALING_BY_SCF_KIT	38	0.55	1.34	0.091	0.766			37	REACTOME_SIGNALING_BY_CSF3_G_CSF	29	-0.67	-1.47	0.031	0.344
	38	REACTOME_RMTS_METHYLATE_HISTONE_ARGININES	62	0.49	1.34	0.067	0.75			38	REACTOME_G_ALPHA_I_SIGNALLING_EVENTS	147	-0.54	-1.46	0.006	0.358
	39	REACTOME_G2_M_DNA_DAMAGE_CHECKPOINT	84	0.46	1.34	0.01	0.741			39	REACTOME_ASSEMBLY_AND_CELL_SURFACE_PRESENTATION_OF_NMDA_RECEPTORS	26	-0.68	-1.46	0.042	0.358
	40	REACTOME_ACTIVATION_OF_THE_MRNA_UPON_BINDING_OF_THE_CAP_BINDING_COMPLEX_AND_EIFS_AND_SUBSEQUENT_BINDING_TO_43S	60	0.49	1.33	0.074	0.744			40	REACTOME_ROS_AND_RNS_PRODUCTION_IN_PHAGOCYTES	28	-0.68	-1.45	0.031	0.38
	41	REACTOME_SARS_COV_2_MODULATES_HOST_TRANSLATION_MACHINERY	51	0.51	1.33	0.07	0.739			41	REACTOME_ACTIVATION_OF_IRF3_IRF7_MEDIATED_BY_TBK1_IKK_EPSILON	16	-0.74	-1.45	0.045	0.382
	42	REACTOME_TRANSCRIPTIONAL_REGULATION_OF_GRANULOPOIESIS	68	0.48	1.33	0.064	0.724			42	REACTOME_TRANSMISSION_ACROSS_CHEMICAL_SYNAPSES	162	-0.53	-1.44	0.001	0.415
	43	REACTOME_TELOMERE_MAINTENANCE	97	0.45	1.33	0.039	0.712			43	REACTOME_GAP_JUNCTION_TRAFFICKING_AND_REGULATION	24	-0.68	-1.44	0.053	0.41
	44	REACTOME_PRC2_METHYLATES_HISTONES_AND_DNA	55	0.49	1.32	0.071	0.731			44	REACTOME_TOLL_LIKE_RECEPTOR_9_TLR9_CASCADE	99	-0.56	-1.44	0.012	0.412
	45	REACTOME_MITOTIC_PROPHASE	122	0.44	1.32	0.048	0.722			45	REACTOME_G_ALPHA_Z_SIGNALLING_EVENTS	27	-0.67	-1.43	0.058	0.403
	46	REACTOME_DNA_METHYLATION	46	0.51	1.31	0.085	0.738			46	REACTOME_VASOPRESSIN_REGULATES_RENAL_WATER_HOMEOSTASIS_VIA_AQUAPORINS	27	-0.67	-1.43	0.041	0.402
	47	REACTOME_E3_UBIQUITIN_LIGASES_UBIQUITINATE_TARGET_PROTEINS	56	0.48	1.3	0.072	0.763			47	REACTOME_TRIGLYCERIDE_CATABOLISM	15	-0.74	-1.43	0.054	0.396
	48	REACTOME_ACTIVATION_OF_ANTERIOR_HOX_GENES_IN_HINDBRAIN_DEVELOPMENT_DURING_EARLY_EMBRYOGENESIS	95	0.44	1.3	0.04	0.771			48	REACTOME_G_PROTEIN_ACTIVATION	15	-0.74	-1.43	0.039	0.394
	49	REACTOME_NEGATIVE_EPIGENETIC_REGULATION_OF_RRNA_EXPRESSION	90	0.45	1.29	0.047	0.775			49	REACTOME_SELECTIVE_AUTOPHAGY	67	-0.57	-1.43	0.024	0.399
	50	REACTOME_DNA_REPLICATION_PRE_INITIATION	142	0.42	1.29	0.026	0.763			50	REACTOME_THE_ROLE_OF_NEF_IN_HIV_1_REPLICATION_AND_DISEASE_PATHOGENESIS	25	-0.67	-1.42	0.063	0.416
	51	REACTOME_NONSENSE_MEDIATED_DECAY_NMD	114	0.43	1.29	0.048	0.759			51	REACTOME_OTHER_SEMAPHORIN_INTERACTIONS	15	-0.73	-1.42	0.062	0.417
	52	REACTOME_PLATELET_AGGREGATION_PLUG_FORMATION	22	0.57	1.29	0.166	0.757			52	REACTOME_COPI_INDEPENDENT_GOLGI_TO_ER_RETROGRADE_TRAFFIC	41	-0.61	-1.42	0.047	0.414
	53	REACTOME_RUNX1_REGULATES_TRANSCRIPTION_OF_GENES_INVOLVED_IN_DIFFERENTIATION_OF_HSCS	106	0.43	1.29	0.056	0.744			53	REACTOME_DISEASES_ASSOCIATED_WITH_O_GLYCOSYLATION_OF_PROTEINS	37	-0.63	-1.42	0.04	0.407
	54	REACTOME_CHROMOSOME_MAINTENANCE	124	0.43	1.28	0.046	0.743			54	REACTOME_KINESINS	48	-0.6	-1.42	0.049	0.4
										55	REACTOME_CONSTITUTIVE_SIGNALING_BY_LIGAND_RESPONSIVE_EGFR_CANCER_VARIANTS	18	-0.71	-1.42	0.056	0.396
										56	REACTOME_SIGNALING_BY_FLT3_ITD_AND_TKD_MUTANTS	15	-0.72	-1.42	0.069	0.39
										57	REACTOME_GPCR_LIGAND_BINDING	159	-0.52	-1.42	0.009	0.384
										58	REACTOME_COOPERATION_OF_PREFOLDIN_AND_TRIC_CCT_IN_ACTIN_AND_TUBULIN_FOLDING	27	-0.66	-1.42	0.06	0.378
										59	REACTOME_SEALING_OF_THE_NUCLEAR_ENVELOPE_NE_BY_ESCRT_III	24	-0.67	-1.41	0.052	0.375
										60	REACTOME_PIWI_INTERACTING_RNA_PIRNA_BIOGENESIS	20	-0.7	-1.41	0.045	0.371
										61	REACTOME_FORMATION_OF_TUBULIN_FOLDING_INTERMEDIATES_BY_CCT_TRIC	20	-0.71	-1.41	0.062	0.378
										62	REACTOME_ATF4_ACTIVATES_GENES_IN_RESPONSE_TO_ENDOPLASMIC_RETICULUM_STRESS	25	-0.67	-1.41	0.061	0.388
										63	REACTOME_NOTCH3_ACTIVATION_AND_TRANSMISSION_OF_SIGNAL_TO_THE_NUCLEUS	21	-0.68	-1.41	0.054	0.384
										64	REACTOME_STING_MEDIATED_INDUCTION_OF_HOST_IMMUNE_RESPONSES	15	-0.74	-1.4	0.071	0.384
										65	REACTOME_APOPTOTIC_CLEAVAGE_OF_CELLULAR_PROTEINS	29	-0.64	-1.4	0.071	0.399
										66	REACTOME_G_BETA_GAMMA_SIGNALLING_THROUGH_PI3KGAMMA	19	-0.69	-1.4	0.074	0.396
										67	REACTOME_G_PROTEIN_BETA_GAMMA_SIGNALLING	26	-0.65	-1.4	0.08	0.392
										68	REACTOME_GLUCAGON_TYPE_LIGAND_RECEPTORS	15	-0.73	-1.4	0.067	0.388
										69	REACTOME_GPER1_SIGNALING	31	-0.64	-1.39	0.062	0.386
										70	REACTOME_PERK_REGULATES_GENE_EXPRESSION	30	-0.64	-1.39	0.071	0.384
										71	REACTOME_DISEASES_OF_GLYCOSYLATION	99	-0.54	-1.39	0.017	0.378
										72	REACTOME_INTERLEUKIN_17_SIGNALING	66	-0.57	-1.39	0.029	0.383
										73	REACTOME_NOTCH4_INTRACELLULAR_DOMAIN_REGULATES_TRANSCRIPTION	17	-0.7	-1.39	0.074	0.385
										74	REACTOME_SIGNALING_BY_NOTCH1	63	-0.57	-1.39	0.045	0.382
Comparation 2: ZMYM3MUT NOTCH1MUT vs WT
		GS DETAILS	SIZE	ES	NES	NOM p-val	FDR q-val				GS DETAILS	SIZE	ES	NES	NOM p-val	FDR q-val
	1	REACTOME_TNFS_BIND_THEIR_PHYSIOLOGICAL_RECEPTORS	23	0.7	1.56	0.015	1000			1	REACTOME_INTERLEUKIN_RECEPTOR_SHC_SIGNALING	21	-0.86	-1.69	0.002	0.148
	2	REACTOME_PLATELET_AGGREGATION_PLUG_FORMATION	22	0.71	1.54	0.026	1000			2	REACTOME_FLT3_SIGNALING_IN_DISEASE	26	-0.81	-1.67	0	0.119
	3	REACTOME_TNFR2_NON_CANONICAL_NF_KB_PATHWAY	92	0.51	1.45	0.005	1000			3	REACTOME_RHO_GTPASES_ACTIVATE_ROCKS	17	-0.87	-1.64	0.002	0.16
	4	REACTOME_SMAD2_SMAD3_SMAD4_HETEROTRIMER_REGULATES_TRANSCRIPTION	35	0.59	1.45	0.043	1000			4	REACTOME_INTERLEUKIN_3_INTERLEUKIN_5_AND_GM_CSF_SIGNALING	42	-0.75	-1.62	0	0.181
	5	REACTOME_MISCELLANEOUS_TRANSPORT_AND_BINDING_EVENTS	19	0.68	1.45	0.052	1000			5	REACTOME_SIGNALING_BY_FLT3_ITD_AND_TKD_MUTANTS	15	-0.86	-1.61	0	0.205
	6	REACTOME_RRNA_MODIFICATION_IN_THE_NUCLEUS_AND_CYTOSOL	59	0.54	1.43	0.027	1000			6	REACTOME_NEGATIVE_REGULATION_OF_MET_ACTIVITY	16	-0.85	-1.6	0.003	0.215
	7	REACTOME_RAS_PROCESSING	22	0.65	1.43	0.058	1000			7	REACTOME_JNK_C_JUN_KINASES_PHOSPHORYLATION_AND_ACTIVATION_MEDIATED_BY_ACTIVATED_HUMAN_TAK1	22	-0.81	-1.59	0.003	0.209
	8	REACTOME_RRNA_PROCESSING	202	0.44	1.38	0	1000			8	REACTOME_G_PROTEIN_MEDIATED_EVENTS	38	-0.74	-1.58	0.003	0.207
	9	REACTOME_CYTOCHROME_P450_ARRANGED_BY_SUBSTRATE_TYPE	27	0.59	1.37	0.082	1000			9	REACTOME_EPHA_MEDIATED_GROWTH_CONE_COLLAPSE	20	-0.8	-1.56	0.005	0.315
	10	REACTOME_TP53_REGULATES_TRANSCRIPTION_OF_ADDITIONAL_CELL_CYCLE_GENES_WHOSE_EXACT_ROLE_IN_THE_P53_PATHWAY_REMAIN_UNCERTAIN	20	0.63	1.36	0.092	1000			10	REACTOME_RHO_GTPASES_ACTIVATE_CIT	17	-0.82	-1.55	0.008	0.314
	11	REACTOME_ARACHIDONIC_ACID_METABOLISM	27	0.58	1.35	0.081	1000			11	REACTOME_CASPASE_ACTIVATION_VIA_EXTRINSIC_APOPTOTIC_SIGNALLING_PATHWAY	22	-0.79	-1.55	0.006	0.287
	12	REACTOME_ASYMMETRIC_LOCALIZATION_OF_PCP_PROTEINS	62	0.49	1.34	0.046	1000			12	REACTOME_OPIOID_SIGNALLING	64	-0.66	-1.53	0.007	0.36
	13	REACTOME_GPVI_MEDIATED_ACTIVATION_CASCADE	29	0.58	1.34	0.084	1000			13	REACTOME_APOPTOTIC_EXECUTION_PHASE	42	-0.71	-1.53	0.007	0.34
	14	REACTOME_METALLOPROTEASE_DUBS	30	0.58	1.33	0.079	1000			14	REACTOME_ASSEMBLY_AND_CELL_SURFACE_PRESENTATION_OF_NMDA_RECEPTORS	26	-0.74	-1.52	0.018	0.374
	15	REACTOME_FCERI_MEDIATED_NF_KB_ACTIVATION	89	0.48	1.33	0.019	1000			15	REACTOME_O_LINKED_GLYCOSYLATION_OF_MUCINS	40	-0.69	-1.52	0.013	0.355
	16	REACTOME_RND1_GTPASE_CYCLE	37	0.55	1.33	0.074	1000			16	REACTOME_MAPK_TARGETS_NUCLEAR_EVENTS_MEDIATED_BY_MAP_KINASES	30	-0.73	-1.51	0.02	0.369
	17	REACTOME_TRANSCRIPTIONAL_ACTIVITY_OF_SMAD2_SMAD3_SMAD4_HETEROTRIMER	49	0.51	1.31	0.087	1000			17	REACTOME_INTERLEUKIN_2_FAMILY_SIGNALING	36	-0.71	-1.5	0.007	0.405
	18	REACTOME_TP53_REGULATES_TRANSCRIPTION_OF_CELL_DEATH_GENES	42	0.53	1.3	0.103	1000			18	REACTOME_SIGNALING_BY_NOTCH3	40	-0.68	-1.48	0.023	0.502
	19	REACTOME_NEUROTRANSMITTER_RELEASE_CYCLE	29	0.55	1.3	0.15	1000			19	REACTOME_INTERLEUKIN_17_SIGNALING	66	-0.63	-1.47	0.012	0.543
	20	REACTOME_OVARIAN_TUMOR_DOMAIN_PROTEASES	37	0.52	1.29	0.1	1000			20	REACTOME_CLASS_A_1_RHODOPSIN_LIKE_RECEPTORS	117	-0.6	-1.47	0.005	0.516
										21	REACTOME_APOPTOTIC_CLEAVAGE_OF_CELLULAR_PROTEINS	29	-0.7	-1.47	0.039	0.51
										22	REACTOME_L1CAM_INTERACTIONS	83	-0.61	-1.46	0.006	0.504
										23	REACTOME_CELL_JUNCTION_ORGANIZATION	57	-0.64	-1.46	0.011	0.492
										24	REACTOME_TRAF6_MEDIATED_INDUCTION_OF_TAK1_COMPLEX_WITHIN_TLR4_COMPLEX	15	-0.78	-1.46	0.035	0.519
										25	REACTOME_CELL_CELL_JUNCTION_ORGANIZATION	37	-0.67	-1.45	0.018	0.538
										26	REACTOME_AGGREPHAGY	33	-0.68	-1.45	0.025	0.53
										27	REACTOME_RHO_GTPASES_ACTIVATE_IQGAPS	24	-0.71	-1.44	0.032	0.551
										28	REACTOME_TIGHT_JUNCTION_INTERACTIONS	15	-0.77	-1.43	0.055	0.575
										29	REACTOME_CARBOXYTERMINAL_POST_TRANSLATIONAL_MODIFICATIONS_OF_TUBULIN	30	-0.69	-1.43	0.03	0.58
										30	REACTOME_NOTCH3_ACTIVATION_AND_TRANSMISSION_OF_SIGNAL_TO_THE_NUCLEUS	21	-0.74	-1.43	0.036	0.587
										31	REACTOME_RUNX2_REGULATES_BONE_DEVELOPMENT	21	-0.72	-1.43	0.043	0.579
										32	REACTOME_PEPTIDE_LIGAND_BINDING_RECEPTORS	67	-0.61	-1.42	0.017	0.6
										33	REACTOME_FLT3_SIGNALING	33	-0.68	-1.42	0.04	0.584
										34	REACTOME_COOPERATION_OF_PREFOLDIN_AND_TRIC_CCT_IN_ACTIN_AND_TUBULIN_FOLDING	27	-0.69	-1.42	0.047	0.576
										35	REACTOME_CELL_CELL_COMMUNICATION	82	-0.59	-1.42	0.016	0.567
										36	REACTOME_DAG_AND_IP3_SIGNALING	31	-0.68	-1.42	0.051	0.553
										37	REACTOME_CA_DEPENDENT_EVENTS	26	-0.7	-1.41	0.044	0.568
										38	REACTOME_RUNX2_REGULATES_OSTEOBLAST_DIFFERENTIATION	17	-0.74	-1.41	0.058	0.574
										39	REACTOME_FORMATION_OF_TUBULIN_FOLDING_INTERMEDIATES_BY_CCT_TRIC	20	-0.73	-1.41	0.062	0.569
										40	REACTOME_LDL_CLEARANCE	17	-0.75	-1.41	0.052	0.557
										41	REACTOME_VLDLR_INTERNALISATION_AND_DEGRADATION	16	-0.75	-1.4	0.064	0.595
										42	REACTOME_GENERATION_OF_SECOND_MESSENGER_MOLECULES	30	-0.67	-1.39	0.046	0.602
										43	REACTOME_SEALING_OF_THE_NUCLEAR_ENVELOPE_NE_BY_ESCRT_III	24	-0.7	-1.39	0.069	0.631
										44	REACTOME_SMOOTH_MUSCLE_CONTRACTION	33	-0.65	-1.39	0.049	0.619
										45	REACTOME_SIGNALING_BY_EGFR	40	-0.64	-1.38	0.043	0.628
										46	REACTOME_FORMATION_OF_SENESCENCE_ASSOCIATED_HETEROCHROMATIN_FOCI_SAHF	15	-0.76	-1.38	0.06	0.619
										47	REACTOME_BILE_ACID_AND_BILE_SALT_METABOLISM	24	-0.68	-1.37	0.076	0.675
										48	REACTOME_SEMAPHORIN_INTERACTIONS	53	-0.61	-1.37	0.05	0.67
										49	REACTOME_THE_PHOTOTRANSDUCTION_CASCADE	18	-0.72	-1.37	0.09	0.657
										50	REACTOME_PROTEIN_FOLDING	78	-0.57	-1.36	0.04	0.663
										51	REACTOME_TOLL_LIKE_RECEPTOR_TLR1_TLR2_CASCADE	100	-0.56	-1.36	0.027	0.661
										52	REACTOME_GPCR_LIGAND_BINDING	159	-0.53	-1.36	0.01	0.672
										53	REACTOME_STING_MEDIATED_INDUCTION_OF_HOST_IMMUNE_RESPONSES	15	-0.74	-1.36	0.084	0.682
										54	REACTOME_SIGNALING_BY_GPCR	335	-0.51	-1.35	0.003	0.712
										55	REACTOME_NR1H3_NR1H2_REGULATE_GENE_EXPRESSION_LINKED_TO_CHOLESTEROL_TRANSPORT_AND_EFFLUX	28	-0.65	-1.35	0.082	0.711
										56	REACTOME_SIGNALING_BY_NTRK3_TRKC	16	-0.71	-1.34	0.11	0.712
										57	REACTOME_IMMUNOREGULATORY_INTERACTIONS_BETWEEN_A_LYMPHOID_AND_A_NON_LYMPHOID_CELL	79	-0.56	-1.34	0.043	0.7
										58	REACTOME_SIGNALING_BY_INSULIN_RECEPTOR	51	-0.59	-1.34	0.076	0.69
										59	REACTOME_ACTIVATED_NOTCH1_TRANSMITS_SIGNAL_TO_THE_NUCLEUS	26	-0.67	-1.34	0.083	0.682
										60	REACTOME_RHO_GTPASES_ACTIVATE_PAKS	20	-0.7	-1.34	0.097	0.687
										61	REACTOME_PROGRAMMED_CELL_DEATH	191	-0.52	-1.34	0.012	0.677
										62	REACTOME_LAMININ_INTERACTIONS	23	-0.67	-1.34	0.101	0.673
										63	REACTOME_RECYCLING_PATHWAY_OF_L1	37	-0.62	-1.33	0.092	0.69
										64	REACTOME_SIGNALING_BY_NOTCH2	27	-0.65	-1.33	0.089	0.693
										65	REACTOME_NEUROTRANSMITTER_RECEPTORS_AND_POSTSYNAPTIC_SIGNAL_TRANSMISSION	121	-0.54	-1.33	0.034	0.695
										66	REACTOME_G_ALPHA_I_SIGNALLING_EVENTS	147	-0.53	-1.33	0.03	0.687
										67	REACTOME_PLASMA_LIPOPROTEIN_CLEARANCE	30	-0.64	-1.33	0.091	0.691
										68	REACTOME_DARPP_32_EVENTS	21	-0.67	-1.32	0.113	0.693
										69	REACTOME_ELASTIC_FIBRE_FORMATION	25	-0.66	-1.32	0.098	0.726
										70	REACTOME_NUCLEAR_ENVELOPE_NE_REASSEMBLY	68	-0.56	-1.32	0.058	0.717
										71	REACTOME_FACTORS_INVOLVED_IN_MEGAKARYOCYTE_DEVELOPMENT_AND_PLATELET_PRODUCTION	124	-0.52	-1.31	0.035	0.739
Comparation 3: ZMYM3MUT NOTCH1MUT vs NOTCH1MUT
		GS DETAILS	SIZE	ES	NES	NOM p-val	FDR q-val				GS DETAILS	SIZE	ES	NES	NOM p-val	FDR q-val
	1	REACTOME_RAC2_GTPASE_CYCLE	78	0.65	1.63	0	1000			1	REACTOME_APOPTOTIC_EXECUTION_PHASE	42	-0.75	-1.72	0.002	0.351
	2	REACTOME_AZATHIOPRINE_ADME	17	0.82	1.59	0.009	1000			2	REACTOME_NEGATIVE_REGULATION_OF_MET_ACTIVITY	16	-0.87	-1.72	0.002	0.21
	3	REACTOME_CREATION_OF_C4_AND_C2_ACTIVATORS	16	0.79	1.51	0.038	1000			3	REACTOME_G_PROTEIN_MEDIATED_EVENTS	38	-0.75	-1.71	0	0.159
	4	REACTOME_POTENTIAL_THERAPEUTICS_FOR_SARS	104	0.57	1.5	0.007	1000			4	REACTOME_DISEASES_OF_IMMUNE_SYSTEM	23	-0.79	-1.68	0.004	0.222
	5	REACTOME_TNFS_BIND_THEIR_PHYSIOLOGICAL_RECEPTORS	23	0.73	1.5	0.033	1000			5	REACTOME_SARS_COV_1_MODULATES_HOST_TRANSLATION_MACHINERY	37	-0.72	-1.67	0.002	0.211
	6	REACTOME_RAC3_GTPASE_CYCLE	81	0.59	1.49	0.011	1000			6	REACTOME_CLASS_A_1_RHODOPSIN_LIKE_RECEPTORS	117	-0.61	-1.65	0	0.247
	7	REACTOME_NPAS4_REGULATES_EXPRESSION_OF_TARGET_GENES	16	0.77	1.47	0.041	1000			7	REACTOME_APOPTOTIC_CLEAVAGE_OF_CELLULAR_PROTEINS	29	-0.75	-1.63	0.002	0.307
	8	REACTOME_RAC1_GTPASE_CYCLE	153	0.53	1.46	0.007	1000			8	REACTOME_SIGNALING_BY_HEDGEHOG	121	-0.59	-1.61	0	0.355
	9	REACTOME_RAS_PROCESSING	22	0.71	1.44	0.049	1000			9	REACTOME_CASPASE_ACTIVATION_VIA_EXTRINSIC_APOPTOTIC_SIGNALLING_PATHWAY	22	-0.78	-1.6	0.01	0.343
	10	REACTOME_AMINO_ACID_TRANSPORT_ACROSS_THE_PLASMA_MEMBRANE	22	0.72	1.44	0.042	1000			10	REACTOME_APOPTOSIS	162	-0.56	-1.58	0	0.409
	11	REACTOME_TNFR2_NON_CANONICAL_NF_KB_PATHWAY	92	0.56	1.43	0.02	1000			11	REACTOME_NUCLEOTIDE_SALVAGE	20	-0.77	-1.58	0.014	0.378
	12	REACTOME_DAP12_SIGNALING	24	0.65	1.37	0.103	1000			12	REACTOME_REGULATION_OF_EXPRESSION_OF_SLITS_AND_ROBOS	162	-0.57	-1.58	0	0.374
	13	REACTOME_TRANSCRIPTIONAL_REGULATION_BY_NPAS4	27	0.65	1.36	0.083	1000			13	REACTOME_AGGREPHAGY	33	-0.71	-1.57	0.009	0.365
	14	REACTOME_RORA_ACTIVATES_GENE_EXPRESSION	17	0.69	1.35	0.099	1000			14	REACTOME_VLDLR_INTERNALISATION_AND_DEGRADATION	16	-0.8	-1.57	0.019	0.365
										15	REACTOME_OPIOID_SIGNALLING	64	-0.62	-1.55	0.009	0.412
										16	REACTOME_FORMATION_OF_TUBULIN_FOLDING_INTERMEDIATES_BY_CCT_TRIC	20	-0.75	-1.53	0.033	0.471
										17	REACTOME_RHO_GTPASES_ACTIVATE_IQGAPS	24	-0.73	-1.53	0.024	0.451
										18	REACTOME_EPHA_MEDIATED_GROWTH_CONE_COLLAPSE	20	-0.74	-1.52	0.028	0.468
										19	REACTOME_FORMATION_OF_SENESCENCE_ASSOCIATED_HETEROCHROMATIN_FOCI_SAHF	15	-0.79	-1.52	0.027	0.481
										20	REACTOME_SIGNALING_BY_PDGFR_IN_DISEASE	18	-0.76	-1.51	0.045	0.504
										21	REACTOME_PINK1_PRKN_MEDIATED_MITOPHAGY	20	-0.74	-1.5	0.019	0.51
										22	REACTOME_SARS_COV_2_MODULATES_HOST_TRANSLATION_MACHINERY	51	-0.62	-1.48	0.017	0.596
										23	REACTOME_GPCR_LIGAND_BINDING	159	-0.52	-1.46	0.002	0.678
										24	REACTOME_HSP90_CHAPERONE_CYCLE_FOR_STEROID_HORMONE_RECEPTORS_SHR_IN_THE_PRESENCE_OF_LIGAND	44	-0.61	-1.46	0.046	0.684
										25	REACTOME_PROGRAMMED_CELL_DEATH	191	-0.51	-1.46	0.003	0.657
										26	REACTOME_RUNX2_REGULATES_BONE_DEVELOPMENT	21	-0.71	-1.45	0.045	0.662
										27	REACTOME_PEPTIDE_LIGAND_BINDING_RECEPTORS	67	-0.58	-1.45	0.024	0.661
										28	REACTOME_HEDGEHOG_ON_STATE	72	-0.57	-1.45	0.024	0.656
										29	REACTOME_SEALING_OF_THE_NUCLEAR_ENVELOPE_NE_BY_ESCRT_III	24	-0.69	-1.44	0.041	0.686
										31	REACTOME_SIGNALING_BY_GPCR	335	-0.48	-1.43	0.003	0.661
										32	REACTOME_NOTCH3_ACTIVATION_AND_TRANSMISSION_OF_SIGNAL_TO_THE_NUCLEUS	21	-0.69	-1.43	0.041	0.666
Comparation 4: ZMYM3MUT NOTCH1MUT vs ZMYM3MUT
		GS DETAILS	SIZE	ES	NES	NOM p-val	FDR q-val				GS DETAILS	SIZE	ES	NES	NOM p-val	FDR q-val
	1	REACTOME_EXTRA_NUCLEAR_ESTROGEN_SIGNALING	54	0.62	1.7	0.005	0.96			1	REACTOME_RHO_GTPASES_ACTIVATE_ROCKS	17	-0.81	-1.64	0.005	1000
	2	REACTOME_NEUROTRANSMITTER_RELEASE_CYCLE	29	0.68	1.63	0.002	1000			2	REACTOME_NEGATIVE_REGULATION_OF_MET_ACTIVITY	16	-0.81	-1.63	0.005	0.865
	3	REACTOME_SIGNALING_BY_ERBB2_ECD_MUTANTS	15	0.74	1.59	0.009	1000			3	REACTOME_DIFFERENTIATION_OF_KERATINOCYTES_IN_INTERFOLLICULAR_EPIDERMIS_IN_MAMMALIAN_SKIN	19	-0.78	-1.62	0.002	0.737
	4	REACTOME_GPVI_MEDIATED_ACTIVATION_CASCADE	29	0.63	1.55	0.013	1000			4	REACTOME_RUNX2_REGULATES_OSTEOBLAST_DIFFERENTIATION	17	-0.77	-1.56	0.013	1000
	5	REACTOME_BASIGIN_INTERACTIONS	17	0.71	1.53	0.021	1000			5	REACTOME_RHO_GTPASES_ACTIVATE_CIT	17	-0.76	-1.55	0.014	1000
	6	REACTOME_PIWI_INTERACTING_RNA_PIRNA_BIOGENESIS	20	0.67	1.49	0.03	1000			6	REACTOME_ADHERENS_JUNCTIONS_INTERACTIONS	37	-0.65	-1.54	0.015	1000
	7	REACTOME_ACTIVATION_OF_KAINATE_RECEPTORS_UPON_GLUTAMATE_BINDING	21	0.64	1.46	0.042	1000			7	REACTOME_TRANSCRIPTIONAL_AND_POST_TRANSLATIONAL_REGULATION_OF_MITF_M_EXPRESSION_AND_ACTIVITY	33	-0.66	-1.54	0.025	0.976
	8	REACTOME_LEISHMANIA_INFECTION	137	0.47	1.45	0.004	1000			8	REACTOME_CELL_CELL_JUNCTION_ORGANIZATION	53	-0.6	-1.52	0.011	1000
	9	REACTOME_BMAL1_CLOCK_NPAS2_ACTIVATES_CIRCADIAN_GENE_EXPRESSION	22	0.62	1.44	0.048	1000			9	REACTOME_REGULATION_OF_HOMOTYPIC_CELL_CELL_ADHESION	23	-0.7	-1.51	0.029	1000
	10	REACTOME_PLATELET_HOMEOSTASIS	55	0.53	1.44	0.038	1000			10	REACTOME_RHO_GTPASES_ACTIVATE_PKNS	71	-0.58	-1.5	0.014	1000
	11	REACTOME_INTERFERON_ALPHA_BETA_SIGNALING	63	0.51	1.42	0.03	1000			11	REACTOME_RUNX2_REGULATES_BONE_DEVELOPMENT	21	-0.7	-1.5	0.026	0.927
	12	REACTOME_ANTI_INFLAMMATORY_RESPONSE_FAVOURING_LEISHMANIA_PARASITE_INFECTION	65	0.5	1.41	0.036	1000			12	REACTOME_CHROMATIN_MODIFICATIONS_DURING_THE_MATERNAL_TO_ZYGOTIC_TRANSITION_MZT	49	-0.59	-1.45	0.026	1000
	13	REACTOME_REGULATION_OF_INSULIN_LIKE_GROWTH_FACTOR_IGF_TRANSPORT_AND_UPTAKE_BY_INSULIN_LIKE_GROWTH_FACTOR_BINDING_PROTEINS_IGFBPS	62	0.51	1.39	0.04	1000			13	REACTOME_APOPTOTIC_EXECUTION_PHASE	42	-0.61	-1.44	0.044	1000
	14	REACTOME_TNFR2_NON_CANONICAL_NF_KB_PATHWAY	92	0.46	1.36	0.031	1000			14	REACTOME_TNF_SIGNALING	56	-0.57	-1.44	0.026	1000
	15	REACTOME_RAC3_GTPASE_CYCLE	81	0.47	1.36	0.047	1000			15	REACTOME_GASTRULATION	80	-0.54	-1.43	0.022	1000
	16	REACTOME_POTENTIAL_THERAPEUTICS_FOR_SARS	104	0.44	1.32	0.039	1000			16	REACTOME_REGULATION_OF_ENDOGENOUS_RETROELEMENTS_BY_KRAB_ZFP_PROTEINS	84	-0.53	-1.42	0.031	1000
	17	REACTOME_INTERFERON_GAMMA_SIGNALING	88	0.45	1.3	0.049	1000			17	REACTOME_CELL_JUNCTION_ORGANIZATION	73	-0.53	-1.39	0.037	1000
	18	REACTOME_SUMOYLATION_OF_DNA_METHYLATION_PROTEINS	16	0.62	1.29	0.172	1000			18	REACTOME_G_PROTEIN_MEDIATED_EVENTS	38	-0.59	-1.39	0.046	1000
	19	REACTOME_CELL_SURFACE_INTERACTIONS_AT_THE_VASCULAR_WALL	107	0.42	1.28	0.038	1000			19	REACTOME_SIGNALING_BY_ROBO_RECEPTORS	200	-0.47	-1.36	0.009	1000
										20	REACTOME_ACTIVATION_OF_ANTERIOR_HOX_GENES_IN_HINDBRAIN_DEVELOPMENT_DURING_EARLY_EMBRYOGENESIS	95	-0.5	-1.34	0.045	1000

## Sheet: Sup. Table S7
Supplementary table S7. Genes significantly enriched in gene sets of histone acetylation and deacetylation of Reactome identied by GSEA.
REACTOME_HATS_ACETYLATE_HISTONES							REACTOME_HDACS_DEACETYLATE_HISTONES				In red, genes exclusive of this gene set
	SYMBOL	RANK IN GENE LIST	RANK METRIC SCORE	RUNNING ES	CORE ENRICHMENT			SYMBOL	RANK IN GENE LIST	RANK METRIC SCORE	RUNNING ES	CORE ENRICHMENT
1	H4C4	19	1341	0.126	Yes		1	H4C4	19	1341	0.133	Yes
2	H2AC12	537	0.427	0.133	Yes		2	H2AC12	537	0.427	0.1424	Yes
3	H2BC18	584	0.408	0.1686	Yes		3	H2BC18	584	0.408	0.1802	Yes
4	H2BC8	690	0.372	0.1971	Yes		4	H2BC8	690	0.372	0.2106	Yes
5	H2AC16	743	0.353	0.2272	Yes		5	H2AC16	743	0.353	0.2425	Yes
6	H2AC17	759	0.349	0.2593	Yes		6	H2AC17	759	0.349	0.2765	Yes
7	H4C3	788	0.34	0.2897	Yes		7	H4C3	788	0.34	0.3087	Yes
8	H2BC14	841	0.323	0.317	Yes		8	H2BC14	841	0.323	0.3376	Yes
9	H3C12	922	0.302	0.3404	Yes		9	H3C12	922	0.302	0.3627	Yes
10	H2AC8	997	0.284	0.3626	Yes		10	H2AC8	997	0.284	0.3864	Yes
11	H3C13	1067	0.27	0.3837	Yes		11	H3C13	1067	0.27	0.4089	Yes
12	H2BC9	1091	0.264	0.4072	Yes		12	H2BC9	1091	0.264	0.4338	Yes
13	H4C12	1244	0.23	0.4191	Yes		13	H4C12	1244	0.23	0.447	Yes
14	H2BC10	1293	0.22	0.4369	Yes		14	H2BC10	1293	0.22	0.4659	Yes
15	H2BC17	1433	0.196	0.4465	Yes		15	H2BC17	1433	0.196	0.4765	Yes
16	H2AC6	1543	0.179	0.4564	Yes		16	HDAC10	1473	0.19	0.493	Yes
17	H3C6	1548	0.178	0.473	Yes		17	H2AC6	1543	0.179	0.5064	Yes
18	H2BC13	1609	0.169	0.4851	Yes		18	H3C6	1548	0.178	0.524	Yes
19	H2AC21	1770	0.149	0.4889	Yes		19	H2BC13	1609	0.169	0.537	Yes
20	H2AC15	1868	0.138	0.4956	Yes		20	H2AC21	1770	0.149	0.5416	Yes
21	H2BC7	1942	0.129	0.5031	Yes		21	H2AC15	1868	0.138	0.5491	Yes
22	H3C7	1997	0.125	0.5115	Yes		22	H2BC7	1942	0.129	0.5573	Yes
23	H4C8	2003	0.124	0.5229	Yes		23	H3C7	1997	0.125	0.5663	Yes
24	H2AC11	2047	0.121	0.5316	Yes		24	H4C8	2003	0.124	0.5784	Yes
25	H2BC6	2214	0.107	0.531	Yes		25	H2AC11	2047	0.121	0.5877	Yes
26	H2BC5	2318	0.1	0.5338	Yes		26	H2BC6	2214	0.107	0.5877	Yes
							27	H2BC5	2318	0.1	0.591	Yes
							28	H2AC13	2555	0.084	0.5842	Yes
							29	H4C9	2644	0.08	0.5865	Yes
							30	TBL1XR1	2711	0.077	0.5899	Yes
							31	H4C16	2732	0.076	0.5962	Yes
							32	H2BC4	2878	0.069	0.5938	Yes
							33	H2BC21	2912	0.068	0.5985	Yes

## Sheet: Sup. Table S8
Supplementary Table S8. Open chromatin regions (peaks) identified by ATAC-seq for each condition
1. WT exclusive peaks
PeakID	Chromosome	Start	End	Strand	Annotation	Detailed Annotation	Distance to TSS	Nearest PromoterID	Entrez ID	Nearest Unigene	Gene Name	Gene Type
101	17	77320916	77321222	+	intron (ENST00000590294, intron 1 of 6)	protein_coding-intron (ENST00000329047, intron 1 of 10)	756	ENST00000591934	ENSG00000184640	ENST00000586812	SEPTIN9	protein_coding
370	2	218908798	218909530	+	promoter-TSS (ENST00000687233)	lncRNA-promoter-TSS (ENST00000687233)	6	ENST00000689696	ENSG00000288898	ENST00000689696		lncRNA
137	2	108385547	108386174	+	intron (ENST00000409309, intron 3 of 4)	protein_coding-intron (ENST00000272452, intron 5 of 6)	7675	ENST00000409309	ENSG00000198075	ENST00000272452	SULT1C4	protein_coding
34	19	1133441	1133872	+	intron (ENST00000590998, intron 4 of 4)	protein_coding-intron (ENST00000361757, intron 4 of 31)	-1435	ENST00000438103	ENSG00000064932	ENST00000586109	SBNO2	protein_coding
59	4	42151833	42152556	+	exon (ENST00000502486, exon 2 of 6)	protein_coding-exon (ENST00000502486, exon 2 of 6)	461	ENST00000502486	ENSG00000188848	ENST00000502486	BEND4	protein_coding
11	1	166166662	166167304	+	promoter-TSS (ENST00000338353)	protein_coding-promoter-TSS (ENST00000338353)	-14	ENST00000338353	ENSG00000188859	ENST00000435676	FAM78B	protein_coding
295	3	53646694	53647082	+	intron (ENST00000640483, intron 3 of 40)	protein_coding-intron (ENST00000288139, intron 3 of 48)	-19475	ENST00000481085	ENSG00000157388	ENST00000636138	CACNA1D	protein_coding
265	11	15453077	15453587	+	Intergenic	Intergenic	28561	ENST00000517263	ENSG00000253072	ENST00000517263		snoRNA
56	14	103057070	103057935	+	promoter-TSS (ENST00000361246)	protein_coding-promoter-TSS (ENST00000361246)	47	ENST00000361246	ENSG00000198752	ENST00000558321	CDC42BPB	protein_coding
376	17	8899044	8899573	+	intron (ENST00000623421, intron 5 of 17)	protein_coding-intron (ENST00000269300, intron 5 of 17)	-5400	ENST00000584456	ENSG00000141506	ENST00000584456	PIK3R5	protein_coding
174	18	79246267	79246878	+	intron (ENST00000590271, intron 12 of 13)	protein_coding-intron (ENST00000307671, intron 11 of 28)	8284	ENST00000591742	ENSG00000267628	ENST00000591742		lncRNA
278	5	59768422	59768915	+	promoter-TSS (ENST00000309641)	protein_coding-promoter-TSS (ENST00000309641)	-32	ENST00000502575	ENSG00000113448	ENST00000309641	PDE4D	protein_coding
155	1	157045507	157046283	+	promoter-TSS (ENST00000361409)	protein_coding-promoter-TSS (ENST00000361409)	-153	ENST00000368194	ENSG00000132694	ENST00000486670	ARHGEF11	protein_coding
363	12	94157974	94158437	+	exon (ENST00000551850, exon 1 of 5)	protein_coding-exon (ENST00000551850, exon 1 of 5)	104	ENST00000551850	ENSG00000136040	ENST00000545312	PLXNC1	protein_coding
8	16	68448375	68448919	+	promoter-TSS (ENST00000219334)	protein_coding-promoter-TSS (ENST00000219334)	-139	ENST00000219334	ENSG00000103056	ENST00000563455	SMPD3	protein_coding
230	6	122610212	122610581	+	promoter-TSS (ENST00000368452)	protein_coding-promoter-TSS (ENST00000368452)	-9	ENST00000368452	ENSG00000135549	ENST00000392490	PKIB	protein_coding
63	13	60662640	60663993	+	intron (ENST00000656845, intron 2 of 5)	lncRNA-intron (ENST00000654911, intron 1 of 2)	-14404	ENST00000656826	ENSG00000225249	ENST00000666620	LINC00378	lncRNA
369	3	172376434	172376799	+	intron (ENST00000416957, intron 23 of 25)	protein_coding-intron (ENST00000336824, intron 23 of 25)	30721	ENST00000490832	ENSG00000075420	ENST00000415807	FNDC3B	protein_coding
236	4	114598248	114599104	+	promoter-TSS (ENST00000310836)	protein_coding-promoter-TSS (ENST00000310836)	-94	ENST00000507710	ENSG00000174607	ENST00000507710	UGT8	protein_coding
222	X	2707304	2707793	+	intron (ENST00000449611, intron 1 of 7)	protein_coding-intron (ENST00000381184, intron 1 of 9)	-9826	ENST00000482293	ENSG00000002586	ENST00000381192	CD99	protein_coding
10	7	36152645	36153377	+	promoter-TSS (ENST00000242108)	protein_coding-promoter-TSS (ENST00000242108)	-243	ENST00000242108	ENSG00000122547	ENST00000468591	EEPD1	protein_coding
338	2	135997374	135997780	+	intron (ENST00000607985, intron 3 of 4)	lncRNA-intron (ENST00000419808, intron 1 of 3)	1385	ENST00000669983	ENSG00000231890	ENST00000625389	DARS1-AS1	lncRNA
341	7	137812242	137812618	+	intron (ENST00000614521, intron 1 of 32)	protein_coding-intron (ENST00000288490, intron 1 of 33)	34106	ENST00000453654	ENSG00000157680	ENST00000477835	DGKI	protein_coding
111	8	51457861	51458337	+	intron (ENST00000356297, intron 8 of 22)	protein_coding-intron (ENST00000356297, intron 8 of 22)	22497	ENST00000521785	ENSG00000254025	ENST00000521785	BRIX1P1	processed_pseudogene
93	7	116210311	116211618	+	exon (ENST00000624389, exon 1 of 1)	TEC-exon (ENST00000624389, exon 1 of 1)	403	ENST00000496871	ENSG00000135269	ENST00000393484	TES	protein_coding
38	1	68496641	68497435	+	promoter-TSS (ENST00000456315)	protein_coding-promoter-TSS (ENST00000456315)	44	ENST00000525124	ENSG00000024526	ENST00000370966	DEPDC1	protein_coding
212	15	88913044	88913571	+	promoter-TSS (ENST00000268150)	protein_coding-promoter-TSS (ENST00000268150)	10	ENST00000558773	ENSG00000140545	ENST00000560553	MFGE8	protein_coding
175	6	25053914	25054344	+	intron (ENST00000416595, intron 2 of 3)	lncRNA-intron (ENST00000416595, intron 2 of 3)	2944	ENST00000416595	ENSG00000223623	ENST00000416595		lncRNA
168	19	21569122	21569517	+	promoter-TSS (ENST00000594564)	lncRNA-promoter-TSS (ENST00000594564)	-63	ENST00000692622	ENSG00000268081	ENST00000594564		lncRNA
139	18	23618881	23619653	+	intron (ENST00000586511, intron 1 of 1)	protein_coding-intron (ENST00000322980, intron 7 of 8)	456	ENST00000586511	ENSG00000154065	ENST00000592179	ANKRD29	protein_coding
121	7	45251907	45252144	+	Intergenic	Intergenic	-16656	ENST00000666999	ENSG00000286738	ENST00000666999		lncRNA
264	2	224025808	224026304	+	intron (ENST00000454956, intron 1 of 2)	protein_coding-intron (ENST00000258405, intron 1 of 8)	4745	ENST00000423446	ENSG00000135919	ENST00000454956	SERPINE2	protein_coding
133	13	101262368	101262645	+	intron (ENST00000676315, intron 9 of 42)	protein_coding-intron (ENST00000251127, intron 10 of 43)	69496	ENST00000675075	ENSG00000102452	ENST00000674840	NALCN	protein_coding
294	8	120298825	120299176	+	intron (ENST00000309791, intron 35 of 47)	protein_coding-intron (ENST00000297848, intron 35 of 47)	-46446	ENST00000440844	ENSG00000187955	ENST00000297848	COL14A1	protein_coding
198	3	20054561	20055198	+	intron (ENST00000426228, intron 1 of 4)	protein_coding-intron (ENST00000263754, intron 1 of 17)	14181	ENST00000426228	ENSG00000114166	ENST00000469085	KAT2B	protein_coding
350	11	58562320	58562787	+	intron (ENST00000528489, intron 2 of 7)	protein_coding-intron (ENST00000395074, intron 3 of 8)	13283	ENST00000530561	ENSG00000110031	ENST00000528489	LPXN	protein_coding
367	6	1609637	1610384	+	promoter-TSS (ENST00000645831)	protein_coding-promoter-TSS (ENST00000645831)	95	ENST00000645831	ENSG00000054598	ENST00000645831	FOXC1	protein_coding
381	18	4251945	4252222	+	intron (ENST00000581527, intron 1 of 11)	protein_coding-intron (ENST00000315677, intron 1 of 12)	-3364	ENST00000577430	ENSG00000170579	ENST00000539435	DLGAP1	protein_coding
356	1	228807672	228808233	+	Intergenic	Intergenic	31640	ENST00000605063	ENSG00000271475	ENST00000605063		processed_pseudogene
154	1	27568398	27568910	+	promoter-TSS (ENST00000644550)	protein_coding-promoter-TSS (ENST00000644550)	-394	ENST00000644550	ENSG00000126705	ENST00000644989	AHDC1	protein_coding
202	5	172114879	172115396	+	promoter-TSS (ENST00000517381)	protein_coding-promoter-TSS (ENST00000517381)	7	ENST00000518267	ENSG00000072786	ENST00000519269	STK10	protein_coding
258	18	58091282	58091657	+	exon (ENST00000587547, exon 1 of 2)	protein_coding-exon (ENST00000587547, exon 1 of 2)	241	ENST00000675227	ENSG00000049759	ENST00000674845	NEDD4L	protein_coding
12	5	115169596	115170511	+	promoter-TSS (ENST00000508894)	protein_coding-promoter-TSS (ENST00000508894)	-144	ENST00000508894	ENSG00000152503	ENST00000510222	TRIM36	protein_coding
19	1	209747622	209748135	+	Intergenic	Intergenic	3505	ENST00000429195	ENSG00000236136	ENST00000429195	ADORA2BP1	processed_pseudogene
215	16	78522351	78522912	+	intron (ENST00000569332, intron 7 of 7)	protein_coding-intron (ENST00000402655, intron 4 of 4)	3904	ENST00000623121	ENSG00000279887	ENST00000623121		TEC
172	3	42772914	42773441	+	promoter-TSS (ENST00000310232)	protein_coding-promoter-TSS (ENST00000310232)	66	ENST00000435327	ENSG00000244607	ENST00000435327	CCDC13	protein_coding
51	13	100608913	100609304	+	intron (ENST00000376234, intron 16 of 17)	protein_coding-intron (ENST00000328767, intron 14 of 15)	15321	ENST00000454311	ENSG00000237082	ENST00000454311	COX5BP6	processed_pseudogene
303	1	81600875	81601182	+	intron (ENST00000430748, intron 1 of 2)	protein_coding-intron (ENST00000370721, intron 3 of 24)	-4522	ENST00000438968	ENSG00000234683	ENST00000438968		processed_pseudogene
77	3	191341048	191341390	+	intron (ENST00000392456, intron 1 of 10)	protein_coding-intron (ENST00000392455, intron 1 of 11)	-10693	ENST00000340524	ENSG00000188958	ENST00000340524	UTS2B	protein_coding
280	16	11363238	11363670	+	intron (ENST00000595168, intron 1 of 1)	protein_coding-intron (ENST00000595168, intron 1 of 1)	-14133	ENST00000574681	ENSG00000262703	ENST00000574681		lncRNA
68	11	61167248	61167815	+	Intergenic	Intergenic	-5916	ENST00000535818	ENSG00000167987	ENST00000301765	VPS37C	protein_coding
286	12	11561005	11561390	+	intron (ENST00000667189, intron 2 of 2)	lncRNA-intron (ENST00000499291, intron 7 of 7)	4231	ENST00000541162	ENSG00000247157	ENST00000499291	LINC01252	lncRNA
327	9	35842788	35843128	+	TTS (ENST00000464519)	protein_coding-TTS (ENST00000464519)	13181	ENST00000490199	ENSG00000137103	ENST00000643932	TMEM8B	protein_coding
251	11	3404206	3404800	+	intron (ENST00000693396, intron 7 of 10)	transcribed_unprocessed_pseudogene-intron (ENST00000450217, intron 4 of 7)	2744	ENST00000450217	ENSG00000223756	ENST00000450217	TSSC2	transcribed_unprocessed_pseudogene
309	3	50600888	50601377	+	promoter-TSS (ENST00000624711)	lncRNA-promoter-TSS (ENST00000624711)	16	ENST00000624711	ENSG00000280382	ENST00000624711		lncRNA
16	15	69755523	69756000	+	promoter-TSS (ENST00000686507)	lncRNA-promoter-TSS (ENST00000686507)	-14	ENST00000687931	ENSG00000289525	ENST00000686507		lncRNA
319	17	7558111	7558308	+	promoter-TSS (ENST00000338784)	protein_coding-promoter-TSS (ENST00000338784)	36	ENST00000610459	ENSG00000276384	ENST00000610459		lncRNA
149	19	48738717	48739176	+	promoter-TSS (ENST00000594232)	protein_coding-promoter-TSS (ENST00000594232)	72	ENST00000599291	ENSG00000105538	ENST00000222145	RASIP1	protein_coding
128	13	57582019	57583299	+	Intergenic	Intergenic	-47449	ENST00000685465	ENSG00000288765	ENST00000685465		lncRNA
25	7	18520312	18521019	+	intron (ENST00000524023, intron 1 of 9)	protein_coding-intron (ENST00000401921, intron 1 of 23)	11352	ENST00000524023	ENSG00000048052	ENST00000406451	HDAC9	protein_coding
94	20	29445037	29445867	+	Intergenic	Intergenic	3854	ENST00000635630	ENSG00000282911	ENST00000635630	DUX4L35	unprocessed_pseudogene
187	1	75784984	75785234	+	intron (ENST00000528016, intron 3 of 4)	protein_coding-intron (ENST00000528016, intron 3 of 4)	-1088	ENST00000496055	ENSG00000137955	ENST00000471759	RABGGTB	protein_coding
161	13	103517467	103517916	+	Intergenic	Intergenic	-72723	ENST00000415853	ENSG00000230474	ENST00000415853	ATP6V1G1P7	processed_pseudogene
224	13	85799140	85799596	+	promoter-TSS (ENST00000645642)	protein_coding-promoter-TSS (ENST00000645642)	51	ENST00000647374	ENSG00000184564	ENST00000647374	SLITRK6	protein_coding
191	4	53001	53433	+	promoter-TSS (ENST00000502981)	protein_coding-promoter-TSS (ENST00000502981)	-69	ENST00000608255	ENSG00000272602	ENST00000509152	ZNF595	protein_coding
143	13	58977926	58978275	+	Intergenic	Intergenic	-32232	ENST00000398005	ENSG00000214281	ENST00000398005	HMGN2P39	processed_pseudogene
205	17	78314126	78314570	+	Intergenic	Intergenic	-1381	ENST00000586321	ENSG00000267737	ENST00000586583		lncRNA
313	10	81866743	81867191	+	Intergenic	Intergenic	8166	ENST00000666227	ENSG00000287358	ENST00000666227		lncRNA
50	19	20238083	20238711	+	promoter-TSS (ENST00000585498)	lncRNA-promoter-TSS (ENST00000585498)	34	ENST00000585816	ENSG00000267383	ENST00000586657		lncRNA
64	1	85576538	85577539	+	promoter-TSS (ENST00000467666)	lncRNA-promoter-TSS (ENST00000467666)	-180	ENST00000467666	ENSG00000282057	ENST00000467666		lncRNA
240	15	27244092	27244511	+	intron (ENST00000615808, intron 3 of 9)	protein_coding-intron (ENST00000555083, intron 3 of 5)	-27240	ENST00000554786	ENSG00000182256	ENST00000553440	GABRG3	protein_coding
4	19	2900505	2901040	+	promoter-TSS (ENST00000306908)	protein_coding-promoter-TSS (ENST00000306908)	-156	ENST00000306908	ENSG00000171970	ENST00000523428	ZNF57	protein_coding
27	3	171822611	171823142	+	intron (ENST00000449106, intron 3 of 3)	lncRNA-intron (ENST00000449106, intron 3 of 3)	-11926	ENST00000497307	ENSG00000075651	ENST00000489995	PLD1	protein_coding
292	1	47437376	47438136	+	promoter-TSS (ENST00000334793)	protein_coding-promoter-TSS (ENST00000334793)	-288	ENST00000334793	ENSG00000186564	ENST00000334793	FOXD2	protein_coding
323	13	110929085	110929606	+	Intergenic	Intergenic	-7414	ENST00000413631	ENSG00000227105	ENST00000413631	PARP1P1	processed_pseudogene
331	7	39304750	39305323	+	intron (ENST00000674059, intron 5 of 10)	protein_coding-intron (ENST00000403058, intron 5 of 10)	24098	ENST00000384220	ENSG00000206947	ENST00000384220	SNORA20B	snoRNA
329	20	23147808	23148361	+	promoter-TSS (ENST00000623468)	TEC-promoter-TSS (ENST00000623468)	-2	ENST00000623468	ENSG00000279164	ENST00000623468		TEC
262	11	36376963	36377808	+	promoter-TSS (ENST00000530050)	protein_coding-promoter-TSS (ENST00000530050)	-137	ENST00000530050	ENSG00000135362	ENST00000527751	PRR5L	protein_coding
246	14	80930137	80930404	+	intron (ENST00000556042, intron 2 of 5)	protein_coding-intron (ENST00000216517, intron 2 of 13)	9270	ENST00000281129	ENSG00000100629	ENST00000555529	CEP128	protein_coding
118	10	129466852	129467577	+	promoter-TSS (ENST00000306010)	protein_coding-promoter-TSS (ENST00000306010)	-15	ENST00000482653	ENSG00000170430	ENST00000482547	MGMT	protein_coding
214	11	117907201	117907641	+	TTS (ENST00000526090)	protein_coding-TTS (ENST00000526090)	21960	ENST00000445164	ENSG00000137747	ENST00000430170	TMPRSS13	protein_coding
348	12	82793741	82794259	+	intron (ENST00000549919, intron 2 of 12)	protein_coding-intron (ENST00000321196, intron 1 of 11)	35445	ENST00000549919	ENSG00000179104	ENST00000551915	TMTC2	protein_coding
307	13	75715591	75716152	+	intron (ENST00000563635, intron 9 of 14)	protein_coding-intron (ENST00000341547, intron 3 of 29)	-26674	ENST00000424489	ENSG00000230902	ENST00000424489	FAM204CP	processed_pseudogene
152	11	17405560	17406011	+	TTS (ENST00000526921)	protein_coding-TTS (ENST00000526921)	-1138	ENST00000528374	ENSG00000006071	ENST00000684332	ABCC8	protein_coding
33	13	96052694	96053924	+	promoter-TSS (ENST00000376712)	protein_coding-promoter-TSS (ENST00000376712)	84	ENST00000376712	ENSG00000102595	ENST00000467305	UGGT2	protein_coding
147	8	143430639	143431119	+	promoter-TSS (ENST00000333480)	protein_coding-promoter-TSS (ENST00000333480)	-147	ENST00000333480	ENSG00000182759	ENST00000528185	MAFA	protein_coding
98	11	121464363	121464995	+	intron (ENST00000532451, intron 1 of 14)	protein_coding-intron (ENST00000260197, intron 1 of 47)	-11666	ENST00000501964	ENSG00000246790	ENST00000501964	SORL1-AS1	lncRNA
108	7	95548519	95548815	+	intron (ENST00000665332, intron 1 of 1)	lncRNA-intron (ENST00000665332, intron 1 of 1)	3423	ENST00000665332	ENSG00000231170	ENST00000669024	PDK4-AS1	lncRNA
317	1	63935250	63935860	+	intron (ENST00000482426, intron 1 of 5)	protein_coding-intron (ENST00000371079, intron 1 of 8)	-91870	ENST00000440942	ENSG00000228056	ENST00000440942	CFL1P3	processed_pseudogene
75	3	50590460	50591161	+	exon (ENST00000232854, exon 11 of 11)	protein_coding-exon (ENST00000232854, exon 11 of 11)	10338	ENST00000624711	ENSG00000280382	ENST00000624711		lncRNA
204	10	112743172	112743663	+	intron (ENST00000705995, intron 8 of 8)	protein_coding-intron (ENST00000393077, intron 7 of 7)	-65598	ENST00000443652	ENSG00000233340	ENST00000443652		lncRNA
189	1	228457460	228458208	+	promoter-TSS (ENST00000366695)	protein_coding-promoter-TSS (ENST00000366695)	39	ENST00000689584	ENSG00000181218	ENST00000366695	H2AC25	protein_coding
225	15	82046092	82046421	+	promoter-TSS (ENST00000329713)	protein_coding-promoter-TSS (ENST00000329713)	-137	ENST00000558133	ENSG00000183496	ENST00000329713	MEX3B	protein_coding
183	21	8400208	8400616	+	intron (ENST00000651813, intron 2 of 6)	lncRNA-intron (ENST00000623860, intron 2 of 6)	4805	ENST00000613359	ENSG00000275215	ENST00000613359	RNA5-8SN3	rRNA
52	12	92029193	92029467	+	intron (ENST00000663764, intron 1 of 1)	lncRNA-intron (ENST00000546975, intron 1 of 4)	-1073	ENST00000551306	ENSG00000257242	ENST00000552106	LINC01619	lncRNA
271	9	102640492	102640984	+	intron (ENST00000374801, intron 3 of 4)	lncRNA-intron (ENST00000374801, intron 3 of 4)	-28583	ENST00000430329	ENSG00000232242	ENST00000430329	ZYG11AP1	processed_pseudogene
346	1	89952956	89953624	+	Intergenic	Intergenic	13689	ENST00000608671	ENSG00000272672	ENST00000608671		lncRNA
144	7	25862136	25862904	+	Intergenic	Intergenic	7198	ENST00000702991	ENSG00000290106	ENST00000702991		lncRNA
116	1	176315421	176315942	+	intron (ENST00000654248, intron 4 of 5)	lncRNA-intron (ENST00000654248, intron 4 of 5)	-9586	ENST00000432461	ENSG00000231020	ENST00000432461		processed_pseudogene
314	9	80378520	80378820	+	Intergenic	Intergenic	-18332	ENST00000443325	ENSG00000236521	ENST00000443325	NPAP1P4	processed_pseudogene
81	12	130993845	130994423	+	promoter-TSS (ENST00000536673)	lncRNA-promoter-TSS (ENST00000536673)	-19	ENST00000544673	ENSG00000111452	ENST00000446583	ADGRD1	protein_coding
207	4	87025718	87026101	+	intron (ENST00000511722, intron 1 of 7)	protein_coding-intron (ENST00000511722, intron 1 of 7)	18666	ENST00000511722	ENSG00000172493	ENST00000514970	AFF1	protein_coding
248	19	2171358	2171836	+	intron (ENST00000686010, intron 1 of 27)	protein_coding-intron (ENST00000398665, intron 1 of 27)	-7129	ENST00000643010	ENSG00000065000	ENST00000699940	AP3D1	protein_coding
231	4	169099892	169100463	+	intron (ENST00000284637, intron 11 of 11)	protein_coding-intron (ENST00000284637, intron 11 of 11)	56480	ENST00000511421	ENSG00000154447	ENST00000502315	SH3RF1	protein_coding
229	11	96062097	96062546	+	intron (ENST00000524717, intron 2 of 4)	protein_coding-intron (ENST00000524717, intron 2 of 4)	-30053	ENST00000648443	ENSG00000285921	ENST00000648443		lncRNA
362	6	150207974	150208273	+	intron (ENST00000361131, intron 1 of 3)	protein_coding-intron (ENST00000361131, intron 1 of 3)	43539	ENST00000459301	ENSG00000238594	ENST00000459301		snoRNA
37	7	50272794	50273239	+	Intergenic	Intergenic	2606	ENST00000440351	ENSG00000235620	ENST00000440351		lncRNA
185	12	54036737	54037189	+	promoter-TSS (ENST00000507650)	protein_coding-promoter-TSS (ENST00000507650)	-891	ENST00000507650	ENSG00000198353	ENST00000430889	HOXC4	protein_coding
223	5	132293511	132294449	+	promoter-TSS (ENST00000200652)	protein_coding-promoter-TSS (ENST00000200652)	-414	ENST00000200652	ENSG00000197208	ENST00000491257	SLC22A4	protein_coding
110	11	2933327	2933933	+	Intergenic	Intergenic	-4210	ENST00000314222	ENSG00000181649	ENST00000314222	PHLDA2	protein_coding
340	1	48851430	48852025	+	intron (ENST00000371836, intron 6 of 6)	protein_coding-intron (ENST00000371836, intron 6 of 6)	-74294	ENST00000663662	ENSG00000286597	ENST00000663662		lncRNA
371	13	73335200	73335593	+	Intergenic	Intergenic	-63635	ENST00000624117	ENSG00000279754	ENST00000624117		TEC
100	1	207822653	207822972	+	promoter-TSS (ENST00000487977)	lncRNA-promoter-TSS (ENST00000487977)	-84	ENST00000487977	ENSG00000203709	ENST00000710905	MIR29B2CHG	lncRNA
1	6	44000189	44000717	+	promoter-TSS (ENST00000336600)	lncRNA-promoter-TSS (ENST00000336600)	-127	ENST00000442114	ENSG00000181577	ENST00000336600	LINC03040	lncRNA
325	4	185063735	185064098	+	intron (ENST00000661234, intron 4 of 5)	lncRNA-intron (ENST00000506338, intron 4 of 5)	794	ENST00000661154	ENSG00000250754	ENST00000653945	LINC02436	lncRNA
23	13	95258619	95259070	+	intron (ENST00000646439, intron 1 of 29)	protein_coding-intron (ENST00000536256, intron 1 of 19)	-15119	ENST00000701353	ENSG00000289887	ENST00000701353		lncRNA
217	1	93591441	93592707	+	promoter-TSS (ENST00000431770)	lncRNA-promoter-TSS (ENST00000431770)	102	ENST00000703038	ENSG00000224093	ENST00000427243	BCAR3-AS1	lncRNA
80	2	37350027	37350399	+	intron (ENST00000404976, intron 1 of 5)	protein_coding-intron (ENST00000338415, intron 1 of 6)	5485	ENST00000470075	ENSG00000115828	ENST00000469098	QPCT	protein_coding
106	4	164956721	164957259	+	promoter-TSS (ENST00000648094)	lncRNA-promoter-TSS (ENST00000648094)	42	ENST00000648094	ENSG00000250486	ENST00000648094	FAM218A	lncRNA
304	5	39460985	39461552	+	intron (ENST00000507990, intron 1 of 1)	protein_coding-intron (ENST00000507990, intron 1 of 1)	886	ENST00000509457	ENSG00000153071	ENST00000513052	DAB2	protein_coding
351	17	21368762	21369320	+	Intergenic	Intergenic	-7316	ENST00000583088	ENSG00000184185	ENST00000583088	KCNJ12	protein_coding
209	11	66312133	66313077	+	promoter-TSS (ENST00000534065)	lncRNA-promoter-TSS (ENST00000534065)	-248	ENST00000534065	ENSG00000254458	ENST00000534065		lncRNA
288	6	165484250	165484803	+	intron (ENST00000678462, intron 1 of 13)	protein_coding-intron (ENST00000366882, intron 2 of 19)	-2183	ENST00000649273	ENSG00000112541	ENST00000693627	PDE10A	protein_coding
184	7	13920207	13920672	+	intron (ENST00000476720, intron 5 of 5)	protein_coding-intron (ENST00000242066, intron 7 of 11)	-13941	ENST00000493831	ENSG00000006468	ENST00000472931	ETV1	protein_coding
227	13	20127728	20128326	+	Intergenic	Intergenic	25326	ENST00000455848	ENSG00000236076	ENST00000455848	LINC01072	lncRNA
380	4	179130815	179131284	+	Intergenic	Intergenic	61612	ENST00000506509	ENSG00000250839	ENST00000506509		unprocessed_pseudogene
315	15	83323453	83323853	+	intron (ENST00000565495, intron 1 of 1)	lncRNA-intron (ENST00000565495, intron 1 of 1)	-38989	ENST00000345382	ENSG00000169594	ENST00000569704	BNC1	protein_coding
203	7	105279676	105279964	+	intron (ENST00000462282, intron 1 of 3)	protein_coding-intron (ENST00000393651, intron 2 of 15)	-10805	ENST00000357311	ENSG00000135250	ENST00000485455	SRPK2	protein_coding
145	13	106570421	106570768	+	intron (ENST00000667614, intron 1 of 1)	lncRNA-intron (ENST00000653952, intron 2 of 2)	2111	ENST00000663663	ENSG00000272274	ENST00000663663	LINC00551	lncRNA
49	18	74291750	74292462	+	promoter-TSS (ENST00000340533)	protein_coding-promoter-TSS (ENST00000340533)	-133	ENST00000397914	ENSG00000166347	ENST00000579064	CYB5A	protein_coding
305	15	25939052	25939505	+	intron (ENST00000669487, intron 1 of 2)	lncRNA-intron (ENST00000383019, intron 1 of 4)	-3537	ENST00000654388	ENSG00000206187	ENST00000654579	LINC02346	lncRNA
213	1	192827201	192827573	+	intron (ENST00000645822, intron 1 of 5)	lncRNA-intron (ENST00000644058, intron 1 of 5)	18244	ENST00000487236	ENSG00000116741	ENST00000483295	RGS2	protein_coding
120	16	81740234	81740499	+	exon (ENST00000562180, exon 2 of 3)	lncRNA-exon (ENST00000562180, exon 2 of 3)	740	ENST00000569731	ENSG00000261218	ENST00000697600		lncRNA
35	7	66204929	66205630	+	promoter-TSS (ENST00000304842)	protein_coding-promoter-TSS (ENST00000304842)	-38	ENST00000442120	ENSG00000169902	ENST00000649664	TPST1	protein_coding
132	2	239294004	239294348	+	intron (ENST00000685474, intron 1 of 3)	protein_coding-intron (ENST00000345617, intron 2 of 26)	4354	ENST00000535493	ENSG00000068024	ENST00000495497	HDAC4	protein_coding
82	18	38934028	38934485	+	Intergenic	Intergenic	82088	ENST00000410772	ENSG00000222704	ENST00000410772	RN7SKP182	misc_RNA
73	6	26240162	26240885	+	exon (ENST00000244537, exon 1 of 1)	protein_coding-exon (ENST00000244537, exon 1 of 1)	130	ENST00000244537	ENSG00000274618	ENST00000244537	H4C6	protein_coding
126	13	77516274	77516757	+	Intergenic	Intergenic	-19159	ENST00000535157	ENSG00000136155	ENST00000471491	SCEL	protein_coding
324	13	75326149	75326959	+	promoter-TSS (ENST00000488955)	protein_coding-promoter-TSS (ENST00000488955)	-304	ENST00000488955	ENSG00000136111	ENST00000413735	TBC1D4	protein_coding
219	9	8261658	8262315	+	Intergenic	Intergenic	222273	ENST00000637354	ENSG00000153707	ENST00000355233	PTPRD	protein_coding
46	9	72294449	72294811	+	Intergenic	Intergenic	5208	ENST00000516619	ENSG00000252428	ENST00000516619	RNA5SP285	rRNA_pseudogene
160	8	98944122	98944639	+	promoter-TSS (ENST00000297565)	protein_coding-promoter-TSS (ENST00000297565)	-23	ENST00000520791	ENSG00000164920	ENST00000520791	OSR2	protein_coding
196	1	207823815	207824243	+	TTS (ENST00000685957)	lncRNA-TTS (ENST00000685957)	1126	ENST00000685957	ENSG00000289071	ENST00000685957		lncRNA
89	19	39944044	39944513	+	promoter-TSS (ENST00000596581)	processed_pseudogene-promoter-TSS (ENST00000596581)	-598	ENST00000596581	ENSG00000187534	ENST00000596581	PRR13P5	processed_pseudogene
190	2	166375212	166376238	+	exon (ENST00000303354, exon 1 of 27)	protein_coding-exon (ENST00000303354, exon 1 of 27)	176	ENST00000303354	ENSG00000169432	ENST00000667991	SCN9A	protein_coding
364	2	224038553	224039784	+	promoter-TSS (ENST00000447280)	protein_coding-promoter-TSS (ENST00000447280)	118	ENST00000258405	ENSG00000135919	ENST00000454956	SERPINE2	protein_coding
166	15	25850154	25851001	+	intron (ENST00000553577, intron 1 of 2)	protein_coding-intron (ENST00000356865, intron 2 of 21)	-1752	ENST00000584117	ENSG00000266517	ENST00000584117	MIR4715	miRNA
86	12	47216362	47216657	+	promoter-TSS (ENST00000500365)	lncRNA-promoter-TSS (ENST00000500365)	-22	ENST00000697435	ENSG00000247774	ENST00000697431	PCED1B-AS1	lncRNA
142	1	92784648	92785561	+	promoter-TSS (ENST00000466778)	protein_coding-promoter-TSS (ENST00000466778)	2	ENST00000474806	ENSG00000067208	ENST00000684568	EVI5	protein_coding
157	13	58843232	58844083	+	Intergenic	Intergenic	-91424	ENST00000425106	ENSG00000223717	ENST00000425106	DNAJA1P1	processed_pseudogene
28	13	36431982	36432518	+	promoter-TSS (ENST00000255465)	protein_coding-promoter-TSS (ENST00000255465)	-245	ENST00000255465	ENSG00000133101	ENST00000625767	CCNA1	protein_coding
42	12	47207258	47207666	+	TTS (ENST00000500365)	lncRNA-TTS (ENST00000500365)	509	ENST00000703411	ENSG00000247774	ENST00000697431	PCED1B-AS1	lncRNA
74	8	38468464	38468830	+	promoter-TSS (ENST00000326324)	protein_coding-promoter-TSS (ENST00000326324)	-6	ENST00000397091	ENSG00000077782	ENST00000526742	FGFR1	protein_coding
312	4	29666684	29667220	+	Intergenic	Intergenic	-81805	ENST00000512363	ENSG00000249542	ENST00000512363	EEF1A1P21	processed_pseudogene
173	5	116564429	116564631	+	intron (ENST00000512156, intron 1 of 1)	protein_coding-intron (ENST00000257414, intron 1 of 19)	1968	ENST00000478778	ENSG00000239528	ENST00000478778	RPS14P8	processed_pseudogene
256	1	121519014	121519810	+	promoter-TSS (ENST00000458200)	transcribed_unprocessed_pseudogene-promoter-TSS (ENST00000458200)	67	ENST00000458200	ENSG00000231752	ENST00000458200	EMBP1	transcribed_unprocessed_pseudogene
302	10	119807963	119808329	+	intron (ENST00000650623, intron 13 of 19)	transcribed_processed_pseudogene-intron (ENST00000636592, intron 2 of 2)	7812	ENST00000636592	ENSG00000270300	ENST00000605639	PHACTR2P1	transcribed_processed_pseudogene
358	X	84960388	84960814	+	Intergenic	Intergenic	-12616	ENST00000456978	ENSG00000230781	ENST00000456978		unitary_pseudogene
267	4	6886179	6886589	+	Intergenic	Intergenic	-22858	ENST00000444368	ENSG00000132405	ENST00000439515	TBC1D14	protein_coding
5	12	125049433	125050207	+	Intergenic	Intergenic	6761	ENST00000541494	ENSG00000256093	ENST00000541494		processed_pseudogene
281	4	151408568	151409240	+	promoter-TSS (ENST00000435205)	protein_coding-promoter-TSS (ENST00000435205)	-69	ENST00000508847	ENSG00000251611	ENST00000508847	FHIP1A-DT	lncRNA
297	9	134872418	134872835	+	Intergenic	Intergenic	4390	ENST00000412680	ENSG00000232355	ENST00000412680		unprocessed_pseudogene
97	2	158457247	158458212	+	promoter-TSS (ENST00000283233)	protein_coding-promoter-TSS (ENST00000283233)	274	ENST00000421462	ENSG00000144283	ENST00000389759	PKP4	protein_coding
135	3	108222063	108222742	+	promoter-TSS (ENST00000264538)	protein_coding-promoter-TSS (ENST00000264538)	22	ENST00000264538	ENSG00000114446	ENST00000485979	IFT57	protein_coding
179	9	134396147	134396655	+	intron (ENST00000649020, intron 1 of 1)	protein_coding-intron (ENST00000649020, intron 1 of 1)	10279	ENST00000649020	ENSG00000186350	ENST00000481739	RXRA	protein_coding
65	10	116849381	116850098	+	promoter-TSS (ENST00000453491)	protein_coding-promoter-TSS (ENST00000453491)	2	ENST00000635765	ENSG00000165868	ENST00000674167	HSPA12A	protein_coding
250	15	90594297	90594877	+	exon (ENST00000560927, exon 2 of 2)	protein_coding-exon (ENST00000560927, exon 2 of 2)	874	ENST00000558005	ENSG00000140577	ENST00000560098	CRTC3	protein_coding
276	8	78726720	78727436	+	intron (ENST00000523959, intron 2 of 4)	protein_coding-intron (ENST00000519833, intron 3 of 6)	-2942	ENST00000520351	ENSG00000254352	ENST00000520351	C4orf46P3	processed_pseudogene
153	6	148146523	148147085	+	Intergenic	Intergenic	-9400	ENST00000417838	ENSG00000230205	ENST00000417838		lncRNA
378	13	95137158	95137494	+	intron (ENST00000646439, intron 18 of 29)	protein_coding-intron (ENST00000536256, intron 18 of 19)	11634	ENST00000644880	ENSG00000125257	ENST00000642524	ABCC4	protein_coding
365	9	99259439	99259905	+	Intergenic	Intergenic	-24350	ENST00000410405	ENSG00000222337	ENST00000410405	RN7SKP225	misc_RNA
24	11	79626268	79626776	+	Intergenic	Intergenic	-14222	ENST00000526851	ENSG00000255209	ENST00000526851		lncRNA
78	8	141206027	141207025	+	TTS (ENST00000517878)	protein_coding-TTS (ENST00000517878)	14195	ENST00000520725	ENSG00000105339	ENST00000518806	DENND3	protein_coding
95	16	83689309	83689742	+	intron (ENST00000654474, intron 2 of 2)	protein_coding-intron (ENST00000268613, intron 11 of 14)	18286	ENST00000654474	ENSG00000261103	ENST00000654474		lncRNA
182	9	80504078	80504326	+	Intergenic	Intergenic	60428	ENST00000427672	ENSG00000232981	ENST00000427672	MTCO1P51	unprocessed_pseudogene
40	13	114115254	114115692	+	intron (ENST00000334062, intron 1 of 23)	protein_coding-intron (ENST00000334062, intron 1 of 23)	-6653	ENST00000454005	ENSG00000232487	ENST00000454005	RASA3-IT1	lncRNA
67	13	91398411	91399136	+	exon (ENST00000377067, exon 1 of 8)	protein_coding-exon (ENST00000377067, exon 1 of 8)	152	ENST00000377067	ENSG00000179399	ENST00000483422	GPC5	protein_coding
270	4	29700760	29701284	+	Intergenic	Intergenic	-47735	ENST00000512363	ENSG00000249542	ENST00000512363	EEF1A1P21	processed_pseudogene
159	5	174608595	174609121	+	Intergenic	Intergenic	-9306	ENST00000505567	ENSG00000250256	ENST00000505567		lncRNA
241	13	51802201	51802497	+	intron (ENST00000642706, intron 3 of 10)	protein_coding-intron (ENST00000218981, intron 1 of 7)	1374	ENST00000497151	ENSG00000102796	ENST00000444610	DHRS12	protein_coding
293	16	63703012	63703536	+	promoter-TSS (ENST00000568231)	processed_pseudogene-promoter-TSS (ENST00000568231)	-209	ENST00000568231	ENSG00000259864	ENST00000568231		processed_pseudogene
269	8	90985094	90985762	+	promoter-TSS (ENST00000517562)	protein_coding-promoter-TSS (ENST00000517562)	-190	ENST00000517562	ENSG00000253250	ENST00000517562	C8orf88	protein_coding
336	5	11731060	11731391	+	intron (ENST00000513588, intron 2 of 21)	protein_coding-intron (ENST00000304623, intron 2 of 21)	-142159	ENST00000706271	ENSG00000169862	ENST00000511377	CTNND2	protein_coding
134	12	101886204	101886544	+	intron (ENST00000551403, intron 1 of 5)	protein_coding-intron (ENST00000258534, intron 1 of 6)	8577	ENST00000549365	ENSG00000136048	ENST00000549066	DRAM1	protein_coding
322	Y	11325823	11326066	+	Intergenic	Intergenic	4387	ENST00000553347	ENSG00000259029	ENST00000553347	DUX4L18	unprocessed_pseudogene
41	10	72331897	72332366	+	TTS (ENST00000338820)	protein_coding-TTS (ENST00000338820)	4734	ENST00000473051	ENSG00000148719	ENST00000461919	DNAJB12	protein_coding
238	22	37256061	37256625	+	intron (ENST00000699915, intron 1 of 6)	protein_coding-intron (ENST00000699915, intron 1 of 6)	3251	ENST00000699915	ENSG00000128340	ENST00000481215	RAC2	protein_coding
263	12	120886145	120886732	+	intron (ENST00000353487, intron 1 of 10)	protein_coding-intron (ENST00000353487, intron 1 of 10)	16932	ENST00000543608	ENSG00000157837	ENST00000392495	SPPL3	protein_coding
299	2	152497482	152497944	+	intron (ENST00000475377, intron 1 of 27)	protein_coding-intron (ENST00000288670, intron 1 of 25)	41714	ENST00000605605	ENSG00000270776	ENST00000605605		processed_pseudogene
330	6	217126	217380	+	Intergenic	Intergenic	-11734	ENST00000661946	ENSG00000263667	ENST00000651295	LINC03066	lncRNA
177	1	165645656	165646269	+	exon (ENST00000461759, exon 1 of 2)	protein_coding-exon (ENST00000461759, exon 1 of 2)	301	ENST00000461759	ENSG00000143198	ENST00000627653	MGST3	protein_coding
260	13	98279556	98280360	+	intron (ENST00000627049, intron 2 of 27)	protein_coding-intron (ENST00000319562, intron 2 of 26)	46308	ENST00000595998	ENSG00000269189	ENST00000595998		lncRNA
333	12	80936590	80937389	+	promoter-TSS (ENST00000549175)	protein_coding-promoter-TSS (ENST00000549175)	575	ENST00000616449	ENSG00000111058	ENST00000548387	ACSS3	protein_coding
66	22	22380438	22380918	+	promoter-TSS (ENST00000390297)	IG_V_gene-promoter-TSS (ENST00000390297)	-88	ENST00000390297	ENSG00000211651	ENST00000390297	IGLV1-44	IG_V_gene
296	3	171828906	171829343	+	intron (ENST00000449106, intron 3 of 3)	lncRNA-intron (ENST00000449106, intron 3 of 3)	-14225	ENST00000334567	ENSG00000186329	ENST00000619900	TMEM212	protein_coding
290	14	68784364	68784807	+	Intergenic	Intergenic	-4367	ENST00000691194	ENSG00000289583	ENST00000691194		lncRNA
339	13	110133572	110133841	+	intron (ENST00000671547, intron 1 of 2)	lncRNA-intron (ENST00000671547, intron 1 of 2)	3200	ENST00000671547	ENSG00000287575	ENST00000671547		lncRNA
266	22	46488127	46488730	+	intron (ENST00000674500, intron 1 of 34)	protein_coding-intron (ENST00000262738, intron 1 of 34)	-6668	ENST00000447383	ENSG00000230634	ENST00000447383	FAM136EP	processed_pseudogene
321	22	39471434	39472177	+	promoter-TSS (ENST00000429402)	protein_coding-promoter-TSS (ENST00000429402)	-983	ENST00000429402	ENSG00000128268	ENST00000429402	MGAT3	protein_coding
69	8	79783506	79784415	+	TTS (ENST00000666705)	lncRNA-TTS (ENST00000666705)	321	ENST00000607754	ENSG00000272138	ENST00000693037	LINC01607	lncRNA
368	12	126447388	126447846	+	intron (ENST00000670916, intron 2 of 3)	lncRNA-intron (ENST00000397346, intron 3 of 11)	2725	ENST00000664729	ENSG00000214043	ENST00000663153	LINC02347	lncRNA
18	8	141001051	141001654	+	promoter-TSS (ENST00000340930)	protein_coding-promoter-TSS (ENST00000340930)	27	ENST00000519993	ENSG00000169398	ENST00000517887	PTK2	protein_coding
375	5	11815863	11816586	+	intron (ENST00000513588, intron 1 of 21)	protein_coding-intron (ENST00000304623, intron 1 of 21)	86968	ENST00000511278	ENSG00000169862	ENST00000511377	CTNND2	protein_coding
242	8	143024054	143024641	+	TTS (ENST00000519615)	protein_coding-TTS (ENST00000519615)	1455	ENST00000706919	ENSG00000291308	ENST00000706919		unitary_pseudogene
257	15	94230979	94231749	+	promoter-TSS (ENST00000357742)	protein_coding-promoter-TSS (ENST00000357742)	-174	ENST00000543482	ENSG00000140563	ENST00000557742	MCTP2	protein_coding
32	1	52842520	52843395	+	exon (ENST00000371528, exon 1 of 14)	protein_coding-exon (ENST00000371528, exon 1 of 14)	197	ENST00000371528	ENSG00000203995	ENST00000371532	ZYG11A	protein_coding
85	X	137791777	137792539	+	intron (ENST00000637564, intron 3 of 4)	lncRNA-intron (ENST00000636095, intron 2 of 3)	-104164	ENST00000410182	ENSG00000222114	ENST00000410182	RNU6-985P	snRNA
273	19	28632108	28633022	+	intron (ENST00000585394, intron 1 of 1)	lncRNA-intron (ENST00000585394, intron 1 of 1)	163	ENST00000589999	ENSG00000266893	ENST00000589999		lncRNA
354	6	135231534	135231920	+	Intergenic	Intergenic	-7433	ENST00000384956	ENSG00000207689	ENST00000384956	MIR548A2	miRNA
156	14	90288652	90289204	+	promoter-TSS (ENST00000555903)	protein_coding-promoter-TSS (ENST00000555903)	-43	ENST00000555903	ENSG00000119720	ENST00000553409	NRDE2	protein_coding
167	1	208244289	208244806	+	promoter-TSS (ENST00000367033)	protein_coding-promoter-TSS (ENST00000367033)	-163	ENST00000367033	ENSG00000076356	ENST00000483048	PLXNA2	protein_coding
181	4	179121093	179121828	+	Intergenic	Intergenic	52023	ENST00000506509	ENSG00000250839	ENST00000506509		unprocessed_pseudogene
235	2	6865292	6866199	+	promoter-TSS (ENST00000404168)	protein_coding-promoter-TSS (ENST00000404168)	18	ENST00000442639	ENSG00000134321	ENST00000442639	RSAD2	protein_coding
197	12	81080509	81080759	+	intron (ENST00000548058, intron 1 of 15)	protein_coding-intron (ENST00000261206, intron 1 of 15)	2555	ENST00000548058	ENSG00000111058	ENST00000548387	ACSS3	protein_coding
53	8	118866480	118866996	+	intron (ENST00000664584, intron 5 of 6)	lncRNA-intron (ENST00000625758, intron 6 of 7)	62335	ENST00000521597	ENSG00000164761	ENST00000297350	TNFRSF11B	protein_coding
279	X	151563426	151564053	+	promoter-TSS (ENST00000370357)	protein_coding-promoter-TSS (ENST00000370357)	10	ENST00000464219	ENSG00000166049	ENST00000370357	PASD1	protein_coding
150	11	127132652	127133713	+	intron (ENST00000646532, intron 1 of 3)	lncRNA-intron (ENST00000609688, intron 1 of 2)	5398	ENST00000646532	ENSG00000255087	ENST00000702180		lncRNA
374	3	5154537	5154992	+	intron (ENST00000429403, intron 2 of 4)	protein_coding-intron (ENST00000256496, intron 1 of 6)	-15788	ENST00000468010	ENSG00000134108	ENST00000468010	ARL8B	protein_coding
176	19	13155639	13156305	+	Intergenic	Intergenic	-1779	ENST00000592882	ENSG00000267598	ENST00000592882		lncRNA
87	4	51595	52165	+	Intergenic	Intergenic	-1406	ENST00000608255	ENSG00000272602	ENST00000509152	ZNF595	protein_coding
253	16	11212854	11213325	+	intron (ENST00000572466, intron 2 of 2)	lncRNA-intron (ENST00000572466, intron 2 of 2)	16912	ENST00000572466	ENSG00000263033	ENST00000572466		lncRNA
31	4	178812678	178813433	+	Intergenic	Intergenic	-127099	ENST00000390889	ENSG00000212191	ENST00000390889		snoRNA
282	10	17616750	17617885	+	promoter-TSS (ENST00000326961)	protein_coding-promoter-TSS (ENST00000326961)	50	ENST00000326961	ENSG00000165996	ENST00000466335	HACD1	protein_coding
337	2	152334915	152335640	+	promoter-TSS (ENST00000475377)	protein_coding-promoter-TSS (ENST00000475377)	103	ENST00000288670	ENSG00000157827	ENST00000475377	FMNL2	protein_coding
14	12	31002932	31003396	+	intron (ENST00000625497, intron 1 of 3)	lncRNA-intron (ENST00000222396, intron 1 of 3)	2684	ENST00000637279	ENSG00000226472	ENST00000637279		transcribed_unprocessed_pseudogene
301	1	91523419	91523866	+	intron (ENST00000428239, intron 11 of 11)	protein_coding-intron (ENST00000234626, intron 11 of 11)	10515	ENST00000486509	ENSG00000097046	ENST00000428239	CDC7	protein_coding
170	12	58920022	58920689	+	promoter-TSS (ENST00000379141)	protein_coding-promoter-TSS (ENST00000379141)	79	ENST00000433272	ENSG00000139263	ENST00000550825	LRIG3	protein_coding
259	3	197627611	197628311	+	promoter-TSS (ENST00000414207)	lncRNA-promoter-TSS (ENST00000414207)	-31	ENST00000686003	ENSG00000291091	ENST00000689716	SDHAP4	lncRNA
311	6	167791469	167792030	+	exon (ENST00000701277, exon 2 of 5)	lncRNA-exon (ENST00000701277, exon 2 of 5)	-3781	ENST00000597278	ENSG00000269155	ENST00000597278		lncRNA
96	3	62318683	62319576	+	promoter-TSS (ENST00000462497)	lncRNA-promoter-TSS (ENST00000462497)	57	ENST00000491323	ENSG00000114405	ENST00000491323	C3orf14	protein_coding
141	3	61723814	61724568	+	intron (ENST00000495879, intron 1 of 2)	protein_coding-intron (ENST00000295874, intron 1 of 28)	15038	ENST00000516611	ENSG00000252420	ENST00000516611	Y_RNA	misc_RNA
30	16	58103035	58103474	+	Intergenic	Intergenic	-10307	ENST00000570133	ENSG00000261151	ENST00000570133		processed_pseudogene
138	5	134555938	134556377	+	intron (ENST00000680418, intron 5 of 12)	protein_coding-intron (ENST00000282605, intron 4 of 11)	-8015	ENST00000470876	ENSG00000043143	ENST00000681019	JADE2	protein_coding
193	13	60158349	60158856	+	intron (ENST00000400324, intron 1 of 27)	protein_coding-intron (ENST00000267215, intron 1 of 26)	5164	ENST00000400319	ENSG00000139734	ENST00000400319	DIAPH3	protein_coding
169	9	17134709	17135807	+	exon (ENST00000380641, exon 1 of 7)	protein_coding-exon (ENST00000380641, exon 1 of 7)	218	ENST00000380647	ENSG00000044459	ENST00000380647	CNTLN	protein_coding
234	15	93460654	93461113	+	intron (ENST00000661485, intron 1 of 2)	lncRNA-intron (ENST00000543286, intron 2 of 3)	5902	ENST00000661485	ENSG00000257060	ENST00000692725		lncRNA
163	6	73394576	73395344	+	promoter-TSS (ENST00000464221)	protein_coding-promoter-TSS (ENST00000464221)	66	ENST00000464221	ENSG00000080007	ENST00000370336	DDX43	protein_coding
199	1	156114143	156114955	+	promoter-TSS (ENST00000368299)	protein_coding-promoter-TSS (ENST00000368299)	-162	ENST00000470199	ENSG00000160789	ENST00000675874	LMNA	protein_coding
99	10	94402215	94403467	+	exon (ENST00000225235, exon 1 of 13)	protein_coding-exon (ENST00000225235, exon 1 of 13)	300	ENST00000225235	ENSG00000108239	ENST00000485048	TBC1D12	protein_coding
355	17	41334345	41334848	+	promoter-TSS (ENST00000435883)	unprocessed_pseudogene-promoter-TSS (ENST00000435883)	-36	ENST00000435883	ENSG00000108516	ENST00000435883		unprocessed_pseudogene
277	11	19790904	19791635	+	intron (ENST00000534229, intron 1 of 4)	protein_coding-intron (ENST00000349880, intron 1 of 37)	13467	ENST00000534229	ENSG00000166833	ENST00000534229	NAV2	protein_coding
216	3	7876645	7877273	+	Intergenic	Intergenic	-86477	ENST00000652500	ENSG00000270207	ENST00000604028		lncRNA
148	2	207907010	207907332	+	intron (ENST00000457206, intron 7 of 7)	protein_coding-intron (ENST00000427836, intron 6 of 7)	-37237	ENST00000421964	ENSG00000225111	ENST00000421964		lncRNA
107	12	100632417	100632986	+	Intergenic	Intergenic	8986	ENST00000552854	ENSG00000139354	ENST00000537247	GAS2L3	protein_coding
244	6	17987422	17988323	+	promoter-TSS (ENST00000259711)	protein_coding-promoter-TSS (ENST00000259711)	-237	ENST00000259711	ENSG00000137177	ENST00000502704	KIF13A	protein_coding
318	7	125773017	125773766	+	Intergenic	Intergenic	-144480	ENST00000411856	ENSG00000197462	ENST00000411856		lncRNA
92	3	52036130	52036692	+	Intergenic	Intergenic	-10352	ENST00000648932	ENSG00000285685	ENST00000648932		lncRNA
131	17	82367786	82368250	+	Intergenic	Intergenic	-3747	ENST00000313135	ENSG00000181408	ENST00000313135	UTS2R	protein_coding
129	7	135186694	135187261	+	exon (ENST00000354475, exon 14 of 15)	protein_coding-exon (ENST00000354475, exon 14 of 15)	3545	ENST00000684486	ENSG00000105875	ENST00000684339	WDR91	protein_coding
58	1	27356584	27357173	+	promoter-TSS (ENST00000486046)	protein_coding-promoter-TSS (ENST00000486046)	289	ENST00000470890	ENSG00000142733	ENST00000374040	MAP3K6	protein_coding
123	12	57726036	57726892	+	exon (ENST00000257897, exon 18 of 18)	protein_coding-exon (ENST00000257897, exon 18 of 18)	193	ENST00000542466	ENSG00000255737	ENST00000542466	AGAP2-AS1	lncRNA
285	7	2529866	2530903	+	Intergenic	Intergenic	3310	ENST00000580107	ENSG00000264357	ENST00000580107	MIR4648	miRNA
210	6	26043270	26044293	+	promoter-TSS (ENST00000454320)	unprocessed_pseudogene-promoter-TSS (ENST00000454320)	-68	ENST00000615966	ENSG00000276410	ENST00000615966	H2BC3	protein_coding
61	8	51394867	51395277	+	intron (ENST00000522628, intron 1 of 4)	protein_coding-intron (ENST00000356297, intron 17 of 22)	13907	ENST00000522933	ENSG00000147485	ENST00000519183	PXDNL	protein_coding
2	1	56332152	56332589	+	promoter-TSS (ENST00000641876)	lncRNA-promoter-TSS (ENST00000641876)	-108	ENST00000641876	ENSG00000260971	ENST00000641177		lncRNA
60	3	61560996	61562001	+	promoter-TSS (ENST00000295874)	protein_coding-promoter-TSS (ENST00000295874)	-71	ENST00000495879	ENSG00000144724	ENST00000485215	PTPRG	protein_coding
200	3	65854660	65855237	+	intron (ENST00000470990, intron 2 of 16)	protein_coding-intron (ENST00000330909, intron 1 of 24)	11058	ENST00000419491	ENSG00000223409	ENST00000419491	RPL17P17	processed_pseudogene
47	1	38046472	38047596	+	promoter-TSS (ENST00000373012)	protein_coding-promoter-TSS (ENST00000373012)	-241	ENST00000373012	ENSG00000185668	ENST00000373012	POU3F1	protein_coding
117	10	22615768	22616359	+	intron (ENST00000376573, intron 1 of 9)	protein_coding-intron (ENST00000376573, intron 1 of 9)	-6346	ENST00000432610	ENSG00000150867	ENST00000604912	PIP4K2A	protein_coding
206	4	159178233	159178700	+	intron (ENST00000691494, intron 1 of 29)	protein_coding-intron (ENST00000505478, intron 1 of 8)	-49572	ENST00000583455	ENSG00000264105	ENST00000583455	MIR3688-1	miRNA
352	14	97177480	97177911	+	Intergenic	Intergenic	-2827	ENST00000690791	ENSG00000285584	ENST00000648645		lncRNA
347	6	167832834	167833304	+	intron (ENST00000366806, intron 1 of 32)	protein_coding-intron (ENST00000344191, intron 1 of 30)	5434	ENST00000366806	ENSG00000130396	ENST00000497596	AFDN	protein_coding
13	14	106831255	106831681	+	TTS (ENST00000523776)	IG_V_pseudogene-TTS (ENST00000523776)	584	ENST00000523776	ENSG00000253310	ENST00000523776	IGHVIII-76-1	IG_V_pseudogene
308	8	115668796	115669255	+	promoter-TSS (ENST00000220888)	protein_coding-promoter-TSS (ENST00000220888)	-50	ENST00000395715	ENSG00000104447	ENST00000220888	TRPS1	protein_coding
36	11	355711	356468	+	Intergenic	Intergenic	-13410	ENST00000329962	ENSG00000182272	ENST00000329962	B4GALNT4	protein_coding
109	1	223142913	223143457	+	promoter-TSS (ENST00000407096)	protein_coding-promoter-TSS (ENST00000407096)	53	ENST00000407096	ENSG00000187554	ENST00000407096	TLR5	protein_coding
284	8	60559140	60559474	+	TTS (ENST00000481569)	protein_coding-TTS (ENST00000481569)	455	ENST00000534260	ENSG00000104388	ENST00000530071	RAB2A	protein_coding
127	2	4656152	4656612	+	promoter-TSS (ENST00000421212)	lncRNA-promoter-TSS (ENST00000421212)	116	ENST00000412134	ENSG00000231532	ENST00000412134	LINC01249	lncRNA
188	5	147782388	147783022	+	promoter-TSS (ENST00000265272)	protein_coding-promoter-TSS (ENST00000265272)	23	ENST00000616793	ENSG00000176049	ENST00000507386	JAKMIP2	protein_coding
90	5	80487836	80488483	+	promoter-TSS (ENST00000282226)	protein_coding-promoter-TSS (ENST00000282226)	35	ENST00000507084	ENSG00000152380	ENST00000507084	FAM151B	protein_coding
45	1	233327309	233327904	+	promoter-TSS (ENST00000366623)	protein_coding-promoter-TSS (ENST00000366623)	-118	ENST00000366624	ENSG00000143674	ENST00000366622	MAP3K21	protein_coding
245	12	81598276	81598567	+	promoter-TSS (ENST00000333447)	protein_coding-promoter-TSS (ENST00000333447)	-50	ENST00000407050	ENSG00000139220	ENST00000547623	PPFIA2	protein_coding
103	20	20452270	20452727	+	intron (ENST00000430436, intron 31 of 32)	protein_coding-intron (ENST00000202677, intron 37 of 39)	60102	ENST00000427175	ENSG00000188559	ENST00000495793	RALGAPA2	protein_coding
39	21	37563610	37564646	+	Intergenic	Intergenic	-29849	ENST00000667151	ENSG00000286717	ENST00000667151		lncRNA
372	2	24365067	24365374	+	Intergenic	Intergenic	-4684	ENST00000355123	ENSG00000198399	ENST00000478720	ITSN2	protein_coding
54	7	139683147	139683775	+	intron (ENST00000428878, intron 2 of 14)	protein_coding-intron (ENST00000342645, intron 1 of 10)	33552	ENST00000342645	ENSG00000064393	ENST00000406875	HIPK2	protein_coding
113	21	19900079	19901032	+	promoter-TSS (ENST00000443479)	lncRNA-promoter-TSS (ENST00000443479)	-512	ENST00000652251	ENSG00000233480	ENST00000652251	LINC01683	lncRNA
343	6	2999379	3000303	+	promoter-TSS (ENST00000338130)	protein_coding-promoter-TSS (ENST00000338130)	-53	ENST00000380455	ENSG00000124588	ENST00000380454	NQO2	protein_coding
7	19	2944833	2945438	+	promoter-TSS (ENST00000314531)	protein_coding-promoter-TSS (ENST00000314531)	-164	ENST00000588050	ENSG00000175691	ENST00000588050	ZNF77	protein_coding
62	17	55238179	55238696	+	Intergenic	Intergenic	-26523	ENST00000226067	ENSG00000108924	ENST00000572002	HLF	protein_coding
220	16	67504391	67504776	+	exon (ENST00000635000, exon 4 of 4)	lncRNA-exon (ENST00000635000, exon 4 of 4)	-13835	ENST00000562116	ENSG00000039523	ENST00000564616	RIPOR1	protein_coding
361	3	12967577	12968208	+	promoter-TSS (ENST00000273221)	protein_coding-promoter-TSS (ENST00000273221)	-224	ENST00000273221	ENSG00000144711	ENST00000474467	IQSEC1	protein_coding
226	10	112215258	112215767	+	promoter-TSS (ENST00000480130)	protein_coding-promoter-TSS (ENST00000480130)	-135	ENST00000480130	ENSG00000119927	ENST00000369425	GPAM	protein_coding
328	1	50109696	50110259	+	intron (ENST00000652353, intron 1 of 4)	protein_coding-intron (ENST00000357083, intron 1 of 6)	140	ENST00000652274	ENSG00000162374	ENST00000651347	ELAVL4	protein_coding
91	8	18008108	18008911	+	intron (ENST00000524226, intron 28 of 34)	protein_coding-intron (ENST00000325083, intron 30 of 38)	2455	ENST00000521338	ENSG00000078674	ENST00000517836	PCM1	protein_coding
232	13	87912590	87912949	+	Intergenic	Intergenic	-20297	ENST00000426627	ENSG00000232204	ENST00000426627	TET1P1	processed_pseudogene
349	13	40770836	40771531	+	promoter-TSS (ENST00000323563)	protein_coding-promoter-TSS (ENST00000323563)	7	ENST00000323563	ENSG00000102738	ENST00000323563	MRPS31	protein_coding
119	4	148442268	148443044	+	promoter-TSS (ENST00000342437)	protein_coding-promoter-TSS (ENST00000342437)	-136	ENST00000625323	ENSG00000151623	ENST00000503313	NR3C2	protein_coding
345	9	72312528	72312882	+	intron (ENST00000657951, intron 1 of 6)	lncRNA-intron (ENST00000436054, intron 1 of 4)	7188	ENST00000451152	ENSG00000225434	ENST00000653572	LINC01504	lncRNA
29	17	63445983	63446671	+	promoter-TSS (ENST00000360793)	protein_coding-promoter-TSS (ENST00000360793)	4	ENST00000583478	ENSG00000008283	ENST00000584031	CYB561	protein_coding
115	7	150364001	150364199	+	exon (ENST00000488310, exon 3 of 3)	lncRNA-exon (ENST00000488310, exon 3 of 3)	-4089	ENST00000519397	ENSG00000214022	ENST00000479668	REPIN1	protein_coding
272	9	82734408	82735010	+	intron (ENST00000637606, intron 9 of 9)	lncRNA-intron (ENST00000637606, intron 9 of 9)	10083	ENST00000432491	ENSG00000233309	ENST00000432491	RPS6P12	processed_pseudogene
180	20	29874939	29875223	+	TTS (ENST00000638107)	rRNA-TTS (ENST00000638107)	1022	ENST00000638107	ENSG00000283433	ENST00000638107	RNA5SP532	rRNA
186	9	86093863	86094453	+	intron (ENST00000466178, intron 1 of 3)	protein_coding-intron (ENST00000388711, intron 1 of 9)	5400	ENST00000388712	ENSG00000135052	ENST00000470762	GOLM1	protein_coding
88	1	197902403	197903260	+	promoter-TSS (ENST00000436652)	protein_coding-promoter-TSS (ENST00000436652)	53	ENST00000436652	ENSG00000203724	ENST00000367393	C1orf53	protein_coding
26	X	3814538	3815300	+	Intergenic	Intergenic	-5005	ENST00000660920	ENSG00000286431	ENST00000660920		lncRNA
151	1	50098533	50099067	+	intron (ENST00000651693, intron 3 of 6)	protein_coding-intron (ENST00000448907, intron 1 of 6)	-5110	ENST00000371827	ENSG00000162374	ENST00000651347	ELAVL4	protein_coding
249	1	238476814	238477291	+	intron (ENST00000649127, intron 2 of 2)	lncRNA-intron (ENST00000649127, intron 2 of 2)	-8393	ENST00000442726	ENSG00000231877	ENST00000442726		lncRNA
287	8	56512897	56513401	+	intron (ENST00000518662, intron 2 of 3)	lncRNA-intron (ENST00000518662, intron 2 of 3)	-10391	ENST00000653444	ENSG00000246430	ENST00000499425	LINC00968	lncRNA
124	13	75539624	75540023	+	intron (ENST00000471682, intron 1 of 2)	protein_coding-intron (ENST00000460675, intron 1 of 2)	-1021	ENST00000377612	ENSG00000188243	ENST00000626103	COMMD6	protein_coding
326	15	70504620	70505030	+	intron (ENST00000559752, intron 1 of 1)	lncRNA-intron (ENST00000559752, intron 1 of 1)	1103	ENST00000559752	ENSG00000259473	ENST00000559752	LINC02205	lncRNA
261	12	11855598	11856408	+	intron (ENST00000396373, intron 4 of 7)	protein_coding-intron (ENST00000396373, intron 4 of 7)	-29934	ENST00000266427	ENSG00000139083	ENST00000544715	ETV6	protein_coding
228	20	6767431	6768077	+	promoter-TSS (ENST00000378827)	protein_coding-promoter-TSS (ENST00000378827)	68	ENST00000378827	ENSG00000125845	ENST00000378827	BMP2	protein_coding
15	20	4686139	4687404	+	intron (ENST00000457586, intron 1 of 1)	protein_coding-intron (ENST00000379440, intron 1 of 1)	228	ENST00000457586	ENSG00000171867	ENST00000430350	PRNP	protein_coding
332	12	120225966	120226370	+	promoter-TSS (ENST00000546532)	protein_coding-promoter-TSS (ENST00000546532)	-99	ENST00000548912	ENSG00000089159	ENST00000637624	PXN	protein_coding
291	4	78629220	78629678	+	Intergenic	Intergenic	2936	ENST00000364128	ENSG00000200998	ENST00000364128	Y_RNA	misc_RNA
320	13	80347190	80347571	+	Intergenic	Intergenic	-6254	ENST00000377104	ENSG00000136158	ENST00000377102	SPRY2	protein_coding
243	2	20676824	20677344	+	exon (ENST00000272224, exon 2 of 2)	protein_coding-exon (ENST00000272224, exon 2 of 2)	1848	ENST00000602445	ENSG00000270100	ENST00000602445		lncRNA
105	10	69053775	69054210	+	Intergenic	Intergenic	31214	ENST00000411655	ENSG00000229001	ENST00000411655	ACTBP14	processed_pseudogene
140	13	100334151	100334599	+	intron (ENST00000647303, intron 14 of 20)	protein_coding-intron (ENST00000376279, intron 17 of 22)	28599	ENST00000443601	ENSG00000175198	ENST00000413170	PCCA	protein_coding
310	13	30443977	30444213	+	Intergenic	Intergenic	16104	ENST00000436446	ENSG00000236444	ENST00000436446	UBE2L5	protein_coding
79	2	152421495	152421965	+	intron (ENST00000475377, intron 1 of 27)	protein_coding-intron (ENST00000288670, intron 1 of 25)	31161	ENST00000670244	ENSG00000287085	ENST00000670244		lncRNA
17	13	103464387	103465090	+	Intergenic	Intergenic	-19770	ENST00000415853	ENSG00000230474	ENST00000415853	ATP6V1G1P7	processed_pseudogene
192	7	48088474	48089467	+	promoter-TSS (ENST00000395560)	protein_coding-promoter-TSS (ENST00000395560)	243	ENST00000457596	ENSG00000183696	ENST00000417464	UPP1	protein_coding
162	3	30606402	30607435	+	exon (ENST00000295754, exon 1 of 7)	protein_coding-exon (ENST00000295754, exon 1 of 7)	317	ENST00000359013	ENSG00000163513	ENST00000673250	TGFBR2	protein_coding
76	12	133080000	133081239	+	promoter-TSS (ENST00000319849)	protein_coding-promoter-TSS (ENST00000319849)	145	ENST00000356456	ENSG00000196387	ENST00000355557	ZNF140	protein_coding
114	13	80347810	80348233	+	Intergenic	Intergenic	-6895	ENST00000377104	ENSG00000136158	ENST00000377102	SPRY2	protein_coding
316	2	166343431	166343838	+	intron (ENST00000452182, intron 1 of 10)	protein_coding-intron (ENST00000303354, intron 1 of 26)	-31828	ENST00000667991	ENSG00000169432	ENST00000667991	SCN9A	protein_coding
344	11	329463	329782	+	promoter-TSS (ENST00000679830)	protein_coding-promoter-TSS (ENST00000679830)	-87	ENST00000688089	ENSG00000255328	ENST00000531076		lncRNA
43	4	107931190	107932131	+	promoter-TSS (ENST00000508453)	protein_coding-promoter-TSS (ENST00000508453)	64	ENST00000508453	ENSG00000155016	ENST00000513302	CYP2U1	protein_coding
146	20	5171819	5172523	+	intron (ENST00000468817, intron 2 of 10)	protein_coding-intron (ENST00000450570, intron 1 of 8)	-3931	ENST00000379070	ENSG00000101290	ENST00000379070	CDS2	protein_coding
84	X	126064876	126066108	+	Intergenic	Intergenic	-44270	ENST00000438994	ENSG00000237208	ENST00000438994		lncRNA
218	17	8935214	8935524	+	intron (ENST00000583222, intron 1 of 1)	protein_coding-intron (ENST00000269300, intron 1 of 17)	-22852	ENST00000581552	ENSG00000141506	ENST00000584456	PIK3R5	protein_coding
104	8	61714081	61714959	+	promoter-TSS (ENST00000356457)	protein_coding-promoter-TSS (ENST00000356457)	5	ENST00000519234	ENSG00000198363	ENST00000518306	ASPH	protein_coding
306	5	77630099	77631464	+	exon (ENST00000306422, exon 3 of 3)	protein_coding-exon (ENST00000306422, exon 3 of 3)	6212	ENST00000515716	ENSG00000171540	ENST00000306422	OTP	protein_coding
252	18	71327819	71328203	+	Intergenic	Intergenic	-90853	ENST00000581940	ENSG00000265484	ENST00000581940		lncRNA
208	3	185351661	185352180	+	intron (ENST00000443863, intron 2 of 13)	protein_coding-intron (ENST00000424227, intron 2 of 14)	-11216	ENST00000265026	ENSG00000073803	ENST00000454237	MAP3K13	protein_coding
247	4	42149002	42149400	+	intron (ENST00000504360, intron 2 of 5)	protein_coding-intron (ENST00000502486, intron 2 of 5)	-1827	ENST00000645181	ENSG00000285454	ENST00000645181		lncRNA
289	1	244904332	244905030	+	Intergenic	Intergenic	-39229	ENST00000364888	ENSG00000201758	ENST00000364888	RN7SKP55	misc_RNA
283	16	17027761	17028123	+	Intergenic	Intergenic	57107	ENST00000623235	ENSG00000279490	ENST00000623235		TEC
125	20	29079961	29080631	+	promoter-TSS (ENST00000635586)	unprocessed_pseudogene-promoter-TSS (ENST00000635586)	-94	ENST00000635586	ENSG00000282870	ENST00000635586	FRG1DP	unprocessed_pseudogene
3	X	135003852	135004441	+	Intergenic	Intergenic	13155	ENST00000330288	ENSG00000184785	ENST00000330288	SMIM10	protein_coding
300	12	32399277	32399964	+	promoter-TSS (ENST00000534526)	protein_coding-promoter-TSS (ENST00000534526)	62	ENST00000534526	ENSG00000139132	ENST00000494275	FGD4	protein_coding
171	9	14315031	14315657	+	promoter-TSS (ENST00000397579)	protein_coding-promoter-TSS (ENST00000397579)	-762	ENST00000397579	ENSG00000147862	ENST00000632375	NFIB	protein_coding
201	9	95494009	95494938	+	promoter-TSS (ENST00000553256)	protein_coding-promoter-TSS (ENST00000553256)	-72	ENST00000553256	ENSG00000185920	ENST00000551630	PTCH1	protein_coding
359	13	101248739	101249050	+	intron (ENST00000676439, intron 11 of 15)	protein_coding-intron (ENST00000251127, intron 11 of 43)	-68705	ENST00000675891	ENSG00000102452	ENST00000674840	NALCN	protein_coding
21	1	28860260	28860698	+	intron (ENST00000234961, intron 2 of 2)	protein_coding-intron (ENST00000234961, intron 2 of 2)	16857	ENST00000418471	ENSG00000233427	ENST00000418471		lncRNA
195	6	44524797	44525324	+	promoter-TSS (ENST00000436113)	lncRNA-promoter-TSS (ENST00000436113)	-199	ENST00000436113	ENSG00000237530	ENST00000663213		lncRNA
237	17	22569469	22570645	+	Intergenic	Intergenic	-1344	ENST00000610586	ENSG00000275480	ENST00000610586		unprocessed_pseudogene
165	21	43352560	43353115	+	Intergenic	Intergenic	8987	ENST00000689953	ENSG00000237989	ENST00000442815	LINC01679	lncRNA
178	16	56951313	56951801	+	Intergenic	Intergenic	9546	ENST00000568814	ENSG00000051108	ENST00000570273	HERPUD1	protein_coding
274	13	110921125	110921559	+	Intergenic	Intergenic	5338	ENST00000620246	ENSG00000277767	ENST00000620246		lncRNA
353	15	40398418	40398909	+	Intergenic	Intergenic	-6822	ENST00000651168	ENSG00000128928	ENST00000466756	IVD	protein_coding
255	X	107684891	107685347	+	Intergenic	Intergenic	-8084	ENST00000701760	ENSG00000289923	ENST00000701760		lncRNA
55	6	147322190	147322779	+	intron (ENST00000706858, intron 2 of 5)	protein_coding-intron (ENST00000321680, intron 16 of 27)	-1816	ENST00000706859	ENSG00000164506	ENST00000706860	STXBP5	protein_coding
377	22	39349599	39350408	+	promoter-TSS (ENST00000216155)	protein_coding-promoter-TSS (ENST00000216155)	-3	ENST00000489206	ENSG00000100321	ENST00000216155	SYNGR1	protein_coding
130	13	98142804	98143670	+	promoter-TSS (ENST00000376581)	protein_coding-promoter-TSS (ENST00000376581)	57	ENST00000600648	ENSG00000152767	ENST00000594346	FARP1	protein_coding
122	19	4328283	4328959	+	promoter-TSS (ENST00000597593)	protein_coding-promoter-TSS (ENST00000597593)	152	ENST00000598443	ENSG00000178078	ENST00000597593	STAP2	protein_coding
20	19	2950394	2951032	+	promoter-TSS (ENST00000692858)	lncRNA-promoter-TSS (ENST00000692858)	-55	ENST00000692858	ENSG00000288906	ENST00000692858		lncRNA
136	4	36303662	36304387	+	intron (ENST00000639862, intron 5 of 9)	protein_coding-intron (ENST00000357504, intron 4 of 8)	-11560	ENST00000506008	ENSG00000197057	ENST00000503528	DTHD1	protein_coding
334	9	98146191	98146946	+	intron (ENST00000375077, intron 2 of 11)	protein_coding-intron (ENST00000343933, intron 2 of 11)	26316	ENST00000343933	ENSG00000106789	ENST00000343933	CORO2A	protein_coding
72	10	44648100	44648713	+	Intergenic	Intergenic	-46302	ENST00000456722	ENSG00000234580	ENST00000456722		lncRNA
44	19	56837459	56838487	+	promoter-TSS (ENST00000649428)	protein_coding-promoter-TSS (ENST00000649428)	-155	ENST00000649428	ENSG00000198300	ENST00000649428	PEG3	protein_coding
6	1	144551314	144552326	+	TTS (ENST00000617626)	snRNA-TTS (ENST00000617626)	123	ENST00000617626	ENSG00000278099	ENST00000617626	RNVU1-2A	snRNA
83	2	158456458	158457047	+	promoter-TSS (ENST00000283233)	protein_coding-promoter-TSS (ENST00000283233)	1	ENST00000417066	ENSG00000153237	ENST00000448656	CCDC148	protein_coding
211	20	59933401	59934325	+	promoter-TSS (ENST00000357552)	protein_coding-promoter-TSS (ENST00000357552)	99	ENST00000358293	ENSG00000196227	ENST00000360816	FAM217B	protein_coding
275	3	190586595	190587072	+	intron (ENST00000453359, intron 2 of 3)	protein_coding-intron (ENST00000072516, intron 2 of 10)	23387	ENST00000453359	ENSG00000196083	ENST00000476929	IL1RAP	protein_coding
112	1	100443800	100444432	+	intron (ENST00000646665, intron 8 of 14)	protein_coding-intron (ENST00000336454, intron 7 of 15)	20384	ENST00000469387	ENSG00000079335	ENST00000455467	CDC14A	protein_coding
71	13	75416600	75417056	+	intron (ENST00000431480, intron 1 of 19)	protein_coding-intron (ENST00000377625, intron 1 of 18)	-39534	ENST00000440094	ENSG00000225203	ENST00000440094		lncRNA
342	14	97377513	97377882	+	Intergenic	Intergenic	-49374	ENST00000655920	ENSG00000246084	ENST00000554260	LINC02325	lncRNA
57	8	17026787	17027866	+	promoter-TSS (ENST00000318063)	protein_coding-promoter-TSS (ENST00000318063)	88	ENST00000318063	ENSG00000155970	ENST00000517398	MICU3	protein_coding
357	16	61970541	61970871	+	intron (ENST00000585315, intron 2 of 10)	protein_coding-intron (ENST00000299345, intron 2 of 12)	50673	ENST00000584966	ENSG00000150394	ENST00000577228	CDH8	protein_coding
239	19	2089873	2090786	+	promoter-TSS (ENST00000591326)	protein_coding-promoter-TSS (ENST00000591326)	-153	ENST00000591326	ENSG00000172081	ENST00000592143	MOB3A	protein_coding
221	10	132446774	132447110	+	promoter-TSS (ENST00000701813)	lncRNA-promoter-TSS (ENST00000701813)	-43	ENST00000701813	ENSG00000180066	ENST00000490765	LINC02870	lncRNA
366	2	54103752	54104101	+	intron (ENST00000607452, intron 4 of 6)	protein_coding-intron (ENST00000607452, intron 4 of 6)	-11477	ENST00000406041	ENSG00000170634	ENST00000606082	ACYP2	protein_coding
164	9	80360052	80361047	+	promoter-TSS (ENST00000443325)	processed_pseudogene-promoter-TSS (ENST00000443325)	-211	ENST00000443325	ENSG00000236521	ENST00000443325	NPAP1P4	processed_pseudogene
268	6	118889116	118889477	+	intron (ENST00000619706, intron 8 of 13)	protein_coding-intron (ENST00000316316, intron 7 of 12)	-4856	ENST00000229595	ENSG00000111875	ENST00000511766	ASF1A	protein_coding
298	2	108621078	108621567	+	promoter-TSS (ENST00000409441)	protein_coding-promoter-TSS (ENST00000409441)	49	ENST00000422797	ENSG00000169756	ENST00000409441	LIMS1	protein_coding
360	1	40875710	40876067	+	intron (ENST00000414199, intron 2 of 2)	lncRNA-intron (ENST00000414199, intron 2 of 2)	11974	ENST00000414199	ENSG00000229528	ENST00000414199		lncRNA
233	1	50108657	50109008	+	promoter-TSS (ENST00000371819)	protein_coding-promoter-TSS (ENST00000371819)	-24	ENST00000650764	ENSG00000162374	ENST00000651347	ELAVL4	protein_coding
194	19	13104347	13104821	+	TTS (ENST00000221504)	protein_coding-TTS (ENST00000221504)	-1423	ENST00000590974	ENSG00000104903	ENST00000590120	LYL1	protein_coding
9	2	120012735	120013561	+	promoter-TSS (ENST00000263713)	protein_coding-promoter-TSS (ENST00000263713)	29	ENST00000331393	ENSG00000115109	ENST00000466241	EPB41L5	protein_coding
379	3	125154808	125155274	+	promoter-TSS (ENST00000485849)	protein_coding-promoter-TSS (ENST00000485849)	24	ENST00000485849	ENSG00000221955	ENST00000465777	SLC12A8	protein_coding
335	6	226735	227064	+	Intergenic	Intergenic	-21380	ENST00000661946	ENSG00000263667	ENST00000651295	LINC03066	lncRNA
102	X	75522845	75523482	+	promoter-TSS (ENST00000373367)	protein_coding-promoter-TSS (ENST00000373367)	-126	ENST00000373367	ENSG00000102383	ENST00000482827	ZDHHC15	protein_coding
48	5	142324596	142325527	+	promoter-TSS (ENST00000344120)	protein_coding-promoter-TSS (ENST00000344120)	-40	ENST00000434127	ENSG00000187678	ENST00000643792	SPRY4	protein_coding
158	2	193502298	193503088	+	Intergenic	Intergenic	-225079	ENST00000441105	ENSG00000235218	ENST00000441105	DNAJC17P1	processed_pseudogene
22	9	114811703	114812027	+	Intergenic	Intergenic	-5826	ENST00000374045	ENSG00000181634	ENST00000374045	TNFSF15	protein_coding
70	6	125811340	125811705	+	intron (ENST00000428318, intron 1 of 2)	protein_coding-intron (ENST00000229634, intron 1 of 14)	1387	ENST00000428318	ENSG00000111912	ENST00000433571	NCOA7	protein_coding
373	5	141475765	141476253	+	promoter-TSS (ENST00000308177)	protein_coding-promoter-TSS (ENST00000308177)	5	ENST00000622656	ENSG00000240184	ENST00000621008	PCDHGC3	protein_coding
254	16	51569343	51569863	+	intron (ENST00000565308, intron 1 of 1)	protein_coding-intron (ENST00000565308, intron 1 of 1)	16167	ENST00000565308	ENSG00000224578	ENST00000565308	HNRNPA1L3	protein_coding
2. WT and NOTCH1MUT shared peaks
PeakID	Chr	Start	End	Strand	Annotation	Detailed Annotation	Distance to TSS	Nearest PromoterID	Entrez ID	Nearest Unigene	Gene Name	Gene Type
13	15	66700800	66701603	+	Intergenic	Intergenic	-1035	ENST00000288840	ENSG00000137834	ENST00000288840	SMAD6	protein_coding
12	2	178514657	178515043	+	exon (ENST00000234453, exon 8 of 8)	protein_coding-exon (ENST00000234453, exon 8 of 8)	-6333	ENST00000585625	ENSG00000237298	ENST00000591466	TTN-AS1	lncRNA
17	15	39275124	39275455	+	intron (ENST00000560484, intron 1 of 3)	lncRNA-intron (ENST00000558209, intron 2 of 2)	-1406	ENST00000561058	ENSG00000259345	ENST00000558209		lncRNA
7	17	58620932	58621529	+	intron (ENST00000389934, intron 5 of 32)	protein_coding-intron (ENST00000240361, intron 5 of 32)	10606	ENST00000390893	ENSG00000212195	ENST00000390893	U3	snoRNA
24	11	2301710	2302086	+	promoter-TSS (ENST00000182290)	protein_coding-promoter-TSS (ENST00000182290)	15	ENST00000456145	ENSG00000110665	ENST00000456145	C11orf21	protein_coding
26	17	16524913	16525182	+	promoter-TSS (ENST00000655442)	lncRNA-promoter-TSS (ENST00000655442)	-785	ENST00000655442	ENSG00000286743	ENST00000655442		lncRNA
38	3	72095469	72095787	+	intron (ENST00000701668, intron 2 of 2)	lncRNA-intron (ENST00000462492, intron 2 of 2)	4484	ENST00000666244	ENSG00000241163	ENST00000488545	LINC00877	lncRNA
35	12	70411188	70411450	+	intron (ENST00000258111, intron 2 of 2)	protein_coding-intron (ENST00000258111, intron 2 of 2)	11109	ENST00000531884	ENSG00000135643	ENST00000258111	KCNMB4	protein_coding
10	2	37561660	37561965	+	promoter-TSS (ENST00000659653)	lncRNA-promoter-TSS (ENST00000659653)	-674	ENST00000659653	ENSG00000236213	ENST00000703028	CDC42EP3-AS1	lncRNA
11	1	31891240	31891699	+	intron (ENST00000602889, intron 1 of 1)	lncRNA-intron (ENST00000602889, intron 1 of 1)	19811	ENST00000489313	ENSG00000184007	ENST00000532289	PTP4A2	protein_coding
23	7	139829134	139829746	+	exon (ENST00000336425, exon 5 of 17)	protein_coding-exon (ENST00000336425, exon 5 of 17)	138	ENST00000414041	ENSG00000059377	ENST00000481440	TBXAS1	protein_coding
5	13	90032690	90033469	+	Intergenic	Intergenic	41248	ENST00000400284	ENSG00000215418	ENST00000400284	PEX12P1	processed_pseudogene
22	7	44729963	44730578	+	Intergenic	Intergenic	-18311	ENST00000413916	ENSG00000122515	ENST00000457123	ZMIZ2	protein_coding
27	5	111083344	111083743	+	intron (ENST00000507269, intron 2 of 3)	lncRNA-intron (ENST00000507269, intron 2 of 3)	8572	ENST00000507269	ENSG00000253613	ENST00000507269		lncRNA
3	5	53464006	53464441	+	Intergenic	Intergenic	-16403	ENST00000396947	ENSG00000134363	ENST00000497789	FST	protein_coding
4	13	51125809	51126098	+	intron (ENST00000636098, intron 1 of 4)	protein_coding-intron (ENST00000433280, intron 1 of 4)	-14679	ENST00000563710	ENSG00000226792	ENST00000569306	C13orf42	protein_coding
20	14	63101848	63102456	+	promoter-TSS (ENST00000394964)	protein_coding-promoter-TSS (ENST00000394964)	-115	ENST00000394964	ENSG00000140015	ENST00000322893	KCNH5	protein_coding
21	12	74292335	74293230	+	promoter-TSS (ENST00000515416)	lncRNA-promoter-TSS (ENST00000515416)	-123	ENST00000662107	ENSG00000251138	ENST00000549905	LINC02882	lncRNA
16	9	91515334	91515673	+	Intergenic	Intergenic	89265	ENST00000442072	ENSG00000233081	ENST00000442072		lncRNA
9	17	64378772	64379360	+	promoter-TSS (ENST00000561739)	protein_coding-promoter-TSS (ENST00000561739)	26	ENST00000561739	ENSG00000261371	ENST00000564866	PECAM1	protein_coding
14	17	43389201	43389400	+	promoter-TSS (ENST00000341011)	lncRNA-promoter-TSS (ENST00000341011)	-74	ENST00000686936	ENSG00000188825	ENST00000592135	LINC00910	lncRNA
29	6	142804575	142804832	+	intron (ENST00000703920, intron 3 of 5)	protein_coding-intron (ENST00000012134, intron 2 of 8)	16580	ENST00000454411	ENSG00000237851	ENST00000454411		lncRNA
8	18	11309230	11309533	+	Intergenic	Intergenic	-16889	ENST00000580702	ENSG00000263682	ENST00000580702		unprocessed_pseudogene
25	9	131982858	131983199	+	intron (ENST00000651950, intron 3 of 8)	protein_coding-intron (ENST00000292035, intron 3 of 7)	96617	ENST00000444872	ENSG00000160563	ENST00000651555	MED27	protein_coding
1	13	73767560	73768034	+	intron (ENST00000703967, intron 5 of 7)	protein_coding-intron (ENST00000377669, intron 5 of 7)	-32277	ENST00000624026	ENSG00000280348	ENST00000624026		TEC
28	9	136576342	136576769	+	Intergenic	Intergenic	27425	ENST00000450304	ENSG00000237886	ENST00000429224	NALT1	lncRNA
6	17	39208781	39209238	+	Intergenic	Intergenic	7994	ENST00000678189	ENSG00000108298	ENST00000579260	RPL19	protein_coding
34	13	42969620	42969879	+	exon (ENST00000536042, exon 3 of 3)	protein_coding-exon (ENST00000536042, exon 3 of 3)	-6166	ENST00000535677	ENSG00000133106	ENST00000538562	EPSTI1	protein_coding
36	8	70217031	70217440	+	intron (ENST00000520416, intron 2 of 2)	protein_coding-intron (ENST00000452400, intron 2 of 22)	28140	ENST00000519724	ENSG00000140396	ENST00000519724	NCOA2	protein_coding
37	6	52495986	52496166	+	TTS (ENST00000538167)	protein_coding-TTS (ENST00000538167)	10907	ENST00000636169	ENSG00000096093	ENST00000635996	EFHC1	protein_coding
33	16	24409162	24409387	+	Intergenic	Intergenic	-9157	ENST00000458867	ENSG00000239081	ENST00000458867	RNU7-24P	snRNA
32	8	120702080	120702452	+	intron (ENST00000648490, intron 1 of 7)	protein_coding-intron (ENST00000395601, intron 2 of 7)	-8358	ENST00000519298	ENSG00000172164	ENST00000520717	SNTB1	protein_coding
19	16	35748790	35749664	+	promoter-TSS (ENST00000517246)	rRNA_pseudogene-promoter-TSS (ENST00000517246)	707	ENST00000516580	ENSG00000274228	ENST00000516580	RNA5SP414	rRNA_pseudogene
18	8	16714715	16715074	+	intron (ENST00000521411, intron 3 of 3)	lncRNA-intron (ENST00000521411, intron 3 of 3)	-21659	ENST00000649038	ENSG00000253496	ENST00000649038		lncRNA
30	15	90157953	90158471	+	Intergenic	Intergenic	-2392	ENST00000559322	ENSG00000185033	ENST00000558895	SEMA4B	protein_coding
31	4	151567150	151567439	+	TTS (ENST00000513086)	protein_coding-TTS (ENST00000513086)	-9472	ENST00000517210	ENSG00000253019	ENST00000517210	RN7SKP35	misc_RNA
15	7	3974462	3974836	+	exon (ENST00000484011, exon 2 of 2)	protein_coding-exon (ENST00000484011, exon 2 of 2)	3183	ENST00000484011	ENSG00000146555	ENST00000478527	SDK1	protein_coding
2	2	168613568	168613880	+	intron (ENST00000392687, intron 3 of 10)	protein_coding-intron (ENST00000305747, intron 3 of 9)	-7228	ENST00000362478	ENSG00000199348	ENST00000362478	RNU6-766P	snRNA
3. ZMYM3MUT and ZMYM3MUT NOTCH1MUT shared peaks
PeakID	Chr	Start	End	Strand	Annotation	Detailed Annotation	Distance to TSS	Nearest PromoterID	Entrez ID	Nearest Unigene	Gene Name	Gene Type
28	3	152160580	152161106	+	intron (ENST00000689682, intron 2 of 2)	lncRNA-intron (ENST00000689682, intron 2 of 2)	-9119	ENST00000482382	ENSG00000239941	ENST00000482382	LINC02917	lncRNA
38	2	7280875	7281127	+	Intergenic	Intergenic	20130	ENST00000606959	ENSG00000272002	ENST00000606959	LINC02973	lncRNA
7	6	91374387	91375062	+	Intergenic	Intergenic	18276	ENST00000434493	ENSG00000224605	ENST00000434493		lncRNA
43	14	69460172	69460490	+	exon (ENST00000031146, exon 6 of 6)	protein_coding-exon (ENST00000031146, exon 6 of 6)	5630	ENST00000554023	ENSG00000029364	ENST00000628474	SLC39A9	protein_coding
58	14	86708778	86709138	+	Intergenic	Intergenic	-196820	ENST00000557527	ENSG00000258804	ENST00000557527	LINC01148	lncRNA
1	5	106006334	106006572	+	Intergenic	Intergenic	-83345	ENST00000364920	ENSG00000201790	ENST00000364920	RNA5SP189	rRNA_pseudogene
80	15	97082885	97083211	+	Intergenic	Intergenic	-132764	ENST00000559321	ENSG00000259485	ENST00000660428	LINC02253	lncRNA
81	X	13843283	13843615	+	intron (ENST00000454189, intron 1 of 6)	protein_coding-intron (ENST00000398361, intron 1 of 6)	-26103	ENST00000356942	ENSG00000046653	ENST00000454189	GPM6B	protein_coding
6	X	76969469	76969751	+	intron (ENST00000671589, intron 1 of 2)	lncRNA-intron (ENST00000626742, intron 2 of 3)	35891	ENST00000385260	ENSG00000207995	ENST00000385260	MIR325	miRNA
11	5	9920783	9921009	+	Intergenic	Intergenic	-17044	ENST00000660091	ENSG00000249781	ENST00000512976	LINC02112	lncRNA
33	5	173786839	173787076	+	exon (ENST00000520324, exon 3 of 3)	lncRNA-exon (ENST00000520324, exon 3 of 3)	1456	ENST00000520324	ENSG00000254211	ENST00000653465	LINC01485	lncRNA
23	2	27096298	27096531	+	intron (ENST00000464371, intron 1 of 5)	protein_coding-intron (ENST00000260598, intron 3 of 7)	1749	ENST00000464371	ENSG00000138030	ENST00000490823	KHK	protein_coding
74	2	150689527	150689904	+	Intergenic	Intergenic	58534	ENST00000653799	ENSG00000224048	ENST00000660328	LINC02612	lncRNA
60	2	185524311	185524650	+	Intergenic	Intergenic	23338	ENST00000414888	ENSG00000225406	ENST00000414888	ELF2P4	processed_pseudogene
61	2	15701307	15701498	+	intron (ENST00000436967, intron 2 of 3)	lncRNA-intron (ENST00000436967, intron 2 of 3)	871	ENST00000476839	ENSG00000231031	ENST00000476839	LINC01804	lncRNA
8	X	3252829	3253081	+	Intergenic	Intergenic	-18589	ENST00000457435	ENSG00000228459	ENST00000688525	LINC01546	lncRNA
10	4	35741686	35741950	+	Intergenic	Intergenic	245920	ENST00000383938	ENSG00000206665	ENST00000383938	RNU6-573P	snRNA
64	11	98573024	98573396	+	Intergenic	Intergenic	-6383	ENST00000527289	ENSG00000254939	ENST00000527289		processed_pseudogene
70	1	14627260	14627537	+	intron (ENST00000636203, intron 3 of 16)	protein_coding-intron (ENST00000376030, intron 1 of 14)	28681	ENST00000503743	ENSG00000189337	ENST00000503743	KAZN	protein_coding
71	21	43613834	43614066	+	TTS (ENST00000443485)	protein_coding-TTS (ENST00000443485)	-3961	ENST00000613967	ENSG00000278433	ENST00000613967	MIR6070	miRNA
14	2	211512745	211513185	+	intron (ENST00000436443, intron 20 of 26)	protein_coding-intron (ENST00000260943, intron 20 of 26)	-22688	ENST00000362715	ENSG00000199585	ENST00000362715	RNA5SP119	rRNA_pseudogene
53	1	119226897	119227278	+	intron (ENST00000418015, intron 4 of 6)	lncRNA-intron (ENST00000413531, intron 4 of 4)	-6991	ENST00000425480	ENSG00000227056	ENST00000425480	RPL6P2	processed_pseudogene
48	14	33727957	33728582	+	intron (ENST00000680362, intron 5 of 10)	protein_coding-intron (ENST00000346562, intron 5 of 10)	-6945	ENST00000681323	ENSG00000151322	ENST00000681796	NPAS3	protein_coding
47	10	59631266	59631549	+	intron (ENST00000644636, intron 6 of 6)	lncRNA-intron (ENST00000644636, intron 6 of 6)	36455	ENST00000644636	ENSG00000235140	ENST00000450677		lncRNA
25	8	2986869	2987076	+	intron (ENST00000635120, intron 54 of 69)	protein_coding-intron (ENST00000335551, intron 41 of 55)	56816	ENST00000519623	ENSG00000183117	ENST00000520630	CSMD1	protein_coding
35	X	87668246	87668582	+	exon (ENST00000373119, exon 11 of 11)	protein_coding-exon (ENST00000373119, exon 11 of 11)	35789	ENST00000448168	ENSG00000237506	ENST00000448168	RPSAP15	processed_pseudogene
32	4	178414113	178414602	+	Intergenic	Intergenic	7662	ENST00000364857	ENSG00000201727	ENST00000364857	RNA5SP173	rRNA_pseudogene
46	9	87270472	87271187	+	intron (ENST00000692846, intron 2 of 3)	lncRNA-intron (ENST00000692846, intron 2 of 3)	6483	ENST00000692846	ENSG00000288903	ENST00000692846		lncRNA
22	1	196381639	196381929	+	intron (ENST00000647658, intron 13 of 29)	protein_coding-intron (ENST00000294725, intron 13 of 27)	46423	ENST00000466914	ENSG00000162687	ENST00000498426	KCNT2	protein_coding
52	13	70043753	70044031	+	intron (ENST00000377844, intron 1 of 10)	protein_coding-intron (ENST00000377844, intron 1 of 10)	-63321	ENST00000414504	ENSG00000230223	ENST00000677785	ATXN8OS	lncRNA
49	4	178275761	178275986	+	Intergenic	Intergenic	-10822	ENST00000472309	ENSG00000241877	ENST00000472309		processed_pseudogene
55	9	7445620	7446133	+	Intergenic	Intergenic	32444	ENST00000413888	ENSG00000230207	ENST00000413888	RPL4P5	processed_pseudogene
56	4	180592416	180592760	+	Intergenic	Intergenic	-18561	ENST00000508134	ENSG00000251025	ENST00000508134	NDUFB5P1	processed_pseudogene
39	4	169033752	169034067	+	Intergenic	Intergenic	23479	ENST00000506933	ENSG00000251445	ENST00000506933	CBR4-DT	lncRNA
29	4	62562504	62562742	+	Intergenic	Intergenic	52154	ENST00000508668	ENSG00000248336	ENST00000508668	HMGN1P11	processed_pseudogene
57	2	188646113	188646376	+	intron (ENST00000431708, intron 4 of 7)	lncRNA-intron (ENST00000431708, intron 4 of 7)	56653	ENST00000496976	ENSG00000144366	ENST00000410051	GULP1	protein_coding
37	10	67695164	67695451	+	intron (ENST00000433211, intron 1 of 17)	protein_coding-intron (ENST00000433211, intron 1 of 17)	888	ENST00000433211	ENSG00000183230	ENST00000682166	CTNNA3	protein_coding
59	4	61873016	61873358	+	intron (ENST00000683033, intron 9 of 26)	protein_coding-intron (ENST00000504896, intron 6 of 24)	-22554	ENST00000502815	ENSG00000150471	ENST00000509896	ADGRL3	protein_coding
27	11	131924044	131924377	+	intron (ENST00000498764, intron 2 of 5)	protein_coding-intron (ENST00000374784, intron 1 of 5)	12742	ENST00000374784	ENSG00000182667	ENST00000683400	NTM	protein_coding
45	1	217660845	217661056	+	intron (ENST00000366933, intron 3 of 10)	protein_coding-intron (ENST00000366933, intron 3 of 10)	29606	ENST00000366933	ENSG00000162814	ENST00000471021	SPATA17	protein_coding
26	4	151653074	151653420	+	intron (ENST00000505231, intron 9 of 11)	protein_coding-intron (ENST00000435205, intron 11 of 13)	-13977	ENST00000508664	ENSG00000164142	ENST00000503146	FHIP1A	protein_coding
42	1	72278558	72278763	+	intron (ENST00000357731, intron 1 of 6)	protein_coding-intron (ENST00000357731, intron 1 of 6)	3879	ENST00000357731	ENSG00000172260	ENST00000357731	NEGR1	protein_coding
36	14	88765133	88765489	+	intron (ENST00000554922, intron 1 of 43)	protein_coding-intron (ENST00000380664, intron 1 of 41)	27192	ENST00000380664	ENSG00000165521	ENST00000555823	EML5	protein_coding
77	11	80349047	80349341	+	Intergenic	Intergenic	-21283	ENST00000532605	ENSG00000254434	ENST00000532605		lncRNA
19	17	19754784	19755012	+	promoter-TSS (ENST00000431878)	processed_pseudogene-promoter-TSS (ENST00000431878)	-346	ENST00000431878	ENSG00000230607	ENST00000431878		processed_pseudogene
69	5	51841373	51841621	+	Intergenic	Intergenic	-45191	ENST00000516064	ENSG00000251873	ENST00000516064	RNA5SP182	rRNA_pseudogene
76	2	7348472	7348708	+	Intergenic	Intergenic	-23528	ENST00000443549	ENSG00000213774	ENST00000443549		processed_pseudogene
67	3	140906835	140907159	+	Intergenic	Intergenic	4803	ENST00000484754	ENSG00000224085	ENST00000484754	RPL23AP41	processed_pseudogene
16	11	91199842	91200306	+	intron (ENST00000526509, intron 4 of 4)	lncRNA-intron (ENST00000526509, intron 4 of 4)	9516	ENST00000625093	ENSG00000278980	ENST00000625093		TEC
79	2	51212402	51212748	+	intron (ENST00000637368, intron 2 of 3)	protein_coding-intron (ENST00000416262, intron 1 of 2)	9189	ENST00000416262	ENSG00000179915	ENST00000636066	NRXN1	protein_coding
17	10	5220210	5220535	+	Intergenic	Intergenic	-3358	ENST00000656002	ENSG00000287848	ENST00000656002		lncRNA
82	4	107592460	107592892	+	intron (ENST00000514815, intron 1 of 1)	protein_coding-intron (ENST00000514815, intron 1 of 1)	39128	ENST00000514815	ENSG00000138801	ENST00000504987	PAPSS1	protein_coding
66	5	11007361	11007552	+	intron (ENST00000706272, intron 13 of 16)	protein_coding-intron (ENST00000304623, intron 18 of 21)	10604	ENST00000506324	ENSG00000169862	ENST00000304623	CTNND2	protein_coding
12	4	11428916	11429365	+	promoter-TSS (ENST00000002596)	protein_coding-promoter-TSS (ENST00000002596)	-246	ENST00000002596	ENSG00000002587	ENST00000514690	HS3ST1	protein_coding
65	2	163610285	163610571	+	TTS (ENST00000482917)	protein_coding-TTS (ENST00000482917)	125556	ENST00000482917	ENSG00000182263	ENST00000333129	FIGN	protein_coding
62	6	18536668	18537060	+	TTS (ENST00000636739)	lncRNA-TTS (ENST00000636739)	14117	ENST00000637804	ENSG00000283408	ENST00000636739	MIR548A1HG	lncRNA
15	4	61860567	61860772	+	intron (ENST00000683033, intron 9 of 26)	protein_coding-intron (ENST00000504896, intron 6 of 24)	-35072	ENST00000502815	ENSG00000150471	ENST00000509896	ADGRL3	protein_coding
75	4	105128323	105128550	+	Intergenic	Intergenic	12183	ENST00000504082	ENSG00000251259	ENST00000504082		lncRNA
72	X	51894574	51894833	+	promoter-TSS (ENST00000482599)	protein_coding-promoter-TSS (ENST00000482599)	134	ENST00000482188	ENSG00000179222	ENST00000375695	MAGED1	protein_coding
20	11	129710295	129710673	+	Intergenic	Intergenic	77706	ENST00000529684	ENSG00000255188	ENST00000529684		processed_pseudogene
63	22	11950353	11950541	+	Intergenic	Intergenic	66845	ENST00000657645	ENSG00000286406	ENST00000657645		transcribed_unprocessed_pseudogene
30	5	171442723	171442979	+	intron (ENST00000274625, intron 3 of 4)	protein_coding-intron (ENST00000274625, intron 3 of 4)	23204	ENST00000274625	ENSG00000156427	ENST00000274625	FGF18	protein_coding
31	7	123983285	123983612	+	Intergenic	Intergenic	-11174	ENST00000472838	ENSG00000241345	ENST00000476892		lncRNA
54	2	134582285	134582450	+	intron (ENST00000281924, intron 2 of 7)	protein_coding-intron (ENST00000281924, intron 2 of 7)	-112331	ENST00000476823	ENSG00000152128	ENST00000281924	TMEM163	protein_coding
13	12	6200254	6200472	+	promoter-TSS (ENST00000009180)	protein_coding-promoter-TSS (ENST00000009180)	0	ENST00000677585	ENSG00000010278	ENST00000481267	CD9	protein_coding
4	17	54495431	54495715	+	Intergenic	Intergenic	17777	ENST00000577104	ENSG00000261965	ENST00000577104	ISCA1P3	processed_pseudogene
21	13	27482848	27483310	+	Intergenic	Intergenic	-5059	ENST00000516690	ENSG00000252499	ENST00000516690	RNU6-63P	snRNA
73	11	27599313	27599532	+	intron (ENST00000532965, intron 4 of 5)	lncRNA-intron (ENST00000499008, intron 3 of 7)	17742	ENST00000476147	ENSG00000240036	ENST00000476147		processed_pseudogene
24	1	68483304	68483880	+	TTS (ENST00000425820)	lncRNA-TTS (ENST00000425820)	-1354	ENST00000488146	ENSG00000024526	ENST00000456315	DEPDC1	protein_coding
34	8	17688180	17688446	+	intron (ENST00000693296, intron 6 of 14)	protein_coding-intron (ENST00000262102, intron 6 of 14)	3904	ENST00000517818	ENSG00000129422	ENST00000521882	MTUS1	protein_coding
51	6	159217580	159217829	+	promoter-TSS (ENST00000480856)	protein_coding-promoter-TSS (ENST00000480856)	-593	ENST00000480856	ENSG00000164694	ENST00000297267	FNDC1	protein_coding
50	4	183571271	183571771	+	Intergenic	Intergenic	54627	ENST00000608204	ENSG00000272744	ENST00000608204		lncRNA
5	3	21335752	21336107	+	Intergenic	Intergenic	-69808	ENST00000475503	ENSG00000236380	ENST00000475503	VENTXP7	processed_pseudogene
18	1	222263877	222264170	+	intron (ENST00000416510, intron 2 of 3)	lncRNA-intron (ENST00000416510, intron 2 of 3)	-1227	ENST00000418582	ENSG00000227613	ENST00000418582	QRSL1P2	processed_pseudogene
44	5	17981803	17982211	+	Intergenic	Intergenic	55188	ENST00000662878	ENSG00000249937	ENST00000687269	LINC02223	lncRNA
68	1	80645680	80645984	+	intron (ENST00000659969, intron 2 of 2)	lncRNA-intron (ENST00000418041, intron 2 of 2)	4552	ENST00000686004	ENSG00000234184	ENST00000443565	LINC01781	lncRNA
83	18	11293695	11294209	+	Intergenic	Intergenic	-32318	ENST00000580702	ENSG00000263682	ENST00000580702		unprocessed_pseudogene
40	5	23884503	23884886	+	Intergenic	Intergenic	-66654	ENST00000512559	ENSG00000248874	ENST00000512559	LINC02899	lncRNA
41	12	92431261	92431470	+	TTS (ENST00000378485)	lncRNA-TTS (ENST00000378485)	-3217	ENST00000646751	ENSG00000205057	ENST00000646751	CLLU1-AS1	lncRNA
9	3	116027698	116027975	+	intron (ENST00000490035, intron 2 of 6)	protein_coding-intron (ENST00000333617, intron 2 of 8)	23416	ENST00000498645	ENSG00000185565	ENST00000475403	LSAMP	protein_coding
2	4	61372918	61373212	+	intron (ENST00000514591, intron 1 of 24)	protein_coding-intron (ENST00000509779, intron 1 of 2)	55156	ENST00000381217	ENSG00000205682	ENST00000381217		lncRNA
3	X	124426370	124426654	+	intron (ENST00000422452, intron 26 of 34)	protein_coding-intron (ENST00000371130, intron 22 of 30)	56461	ENST00000698120	ENSG00000183918	ENST00000371139	SH2D1A	protein_coding
78	3	20682590	20682871	+	intron (ENST00000634618, intron 10 of 16)	lncRNA-intron (ENST00000634618, intron 10 of 16)	-49654	ENST00000634837	ENSG00000231304	ENST00000441442	SGO1-AS1	lncRNA
ZMYM3MUT NOTCH1MUT exclusive peaks
PeakID	Chr	Start	End	Strand	Annotation	Detailed Annotation	Distance to TSS	Nearest PromoterID	Entrez ID	Nearest Unigene	Gene Name	Gene Type
1	11	127632529	127632882	+	Intergenic	Intergenic	-24863	ENST00000529936	ENSG00000254591	ENST00000529936		processed_pseudogene
2	11	131104598	131105053	+	Intergenic	Intergenic	-82197	ENST00000441665	ENSG00000236129	ENST00000441665		lncRNA
4	1	98688269	98688751	+	intron (ENST00000529992, intron 2 of 7)	protein_coding-intron (ENST00000306121, intron 2 of 8)	26287	ENST00000454199	ENSG00000162627	ENST00000454199	SNX7	protein_coding
5	2	146209881	146210343	+	Intergenic	Intergenic	15816	ENST00000413391	ENSG00000230559	ENST00000413391	RPL17P12	processed_pseudogene
7	4	186758980	186759682	+	Intergenic	Intergenic	-32609	ENST00000509647	ENSG00000083857	ENST00000512347	FAT1	protein_coding
3	2	121018649	121019333	+	Intergenic	Intergenic	21719	ENST00000364714	ENSG00000201584	ENST00000364714	Y_RNA	misc_RNA
6	10	55631091	55631689	+	Intergenic	Intergenic	-3448	ENST00000613346	ENSG00000150275	ENST00000644397	PCDH15	protein_coding
8	14	39974024	39974567	+	intron (ENST00000651829, intron 12 of 13)	lncRNA-intron (ENST00000650911, intron 3 of 5)	-242232	ENST00000553464	ENSG00000258526	ENST00000556620		lncRNA
9	X	88893258	88893620	+	Intergenic	Intergenic	-14964	ENST00000440519	ENSG00000232576	ENST00000440519		processed_pseudogene

## Sheet: Sup. Table S9
Supplementary Table S9. Genes associated with WT exclusive ATAC-seq peaks downregulated in ZMYM3MUT NOTCH1MUT cells
	Gene	log Fold Change
	ZNF57	-6.48205
	MGMT	-5.97954
	LINC01249	-5.40316
	MFGE8	-4.93168
	PXDNL	-4.748
	KCNJ12	-4.55289
	POU3F1	-4.33455
	PTPRG	-4.12263
	UPP1	-4.08989
	PCED1B-AS1	-4.0018
	PCED1B-AS1	-4.0018
	NPAP1P4	-3.77861
	NPAP1P4	-3.77861
	PTPRD	-3.67906
	ENSG00000257060	-3.56573
	ENSG00000230781	-3.33115
	EEPD1	-3.30978
	UGT8	-2.96721
	LINC02325	-2.85949
	RASIP1	-2.76356
	GOLM1	-2.51886
	CCNA1	-2.11596
	LINC01504	-2.05441
	LINC03040	-1.9783
	ZNF140	-1.86899
	ENSG00000267598	-1.41633
	LMNA	-1.37756
	UTS2B	-1.27766
	DENND3	-1.25087
	ADGRD1	-1.20517
	HSPA12A	-1.20294
	MAP3K6	-1.1796
	IL1RAP	-1.13681
	HOXC4	-1.11876
	TMTC2	-1.05321
	DGKI	-1.01964
	LINC01619	-1.01921
	OTP	-0.99373
	ZNF595	-0.98658
	ZNF595	-0.98658
	PDE10A	-0.95656
	CTNND2	-0.94831
	CTNND2	-0.94831
	CORO2A	-0.94438
	ENSG00000287575	-0.93641
	C4orf46P3	-0.91308
	DUX4L18	-0.90829
	HDAC9	-0.90425
	ENSG00000267383	-0.8986
	TGFBR2	-0.88985
	CYB5A	-0.88491
	COL14A1	-0.87885
	ENSG00000267737	-0.87308
	STAP2	-0.86144
	SYNGR1	-0.84836
	TMPRSS13	-0.84049
	SORL1-AS1	-0.80946
	MGST3	-0.70994
	ANKRD29	-0.64366
	ENSG00000276384	-0.63283
	NAV2	-0.59135
	PXN	-0.5763
	RPS14P8	-0.57079
	CRTC3	-0.46742
	PDE4D	-0.46156
	GABRG3	-0.41629
	NFIB	-0.40083
	RIPOR1	-0.39656
	TNFRSF11B	-0.38271
	AFF1	-0.35499
	PIP4K2A	-0.34248
	LYL1	-0.33588
	RAC2	-0.30651
	MOB3A	-0.30496
	SBNO2	-0.29505
	STK10	-0.28366
	DARS1-AS1	-0.26811
	JAKMIP2	-0.24434
	COX5BP6	-0.22677
	LINC00551	-0.21856
	ACYP2	-0.21541
	DRAM1	-0.21198
	COMMD6	-0.20364
	ENSG00000237208	-0.19971
	CDC14A	-0.19095
	NEDD4L	-0.17734
	LRIG3	-0.16275
	DIAPH3	-0.16002
	CNTLN	-0.1531
	SRPK2	-0.15188
	ENSG00000277767	-0.14799
	MGAT3	-0.14112
	CD99	-0.12792
	TBC1D4	-0.12752
	CEP128	-0.11576
	STXBP5	-0.10757
	FRG1DP	-0.10603
	PLD1	-0.10331
	AFDN	-0.09694
	FNDC3B	-0.09574
	RXRA	-0.0945
	SH3RF1	-0.07938
	SEPTIN9	-0.07844
	KAT2B	-0.0749
	MAP3K13	-0.07261
	ENSG00000260971	-0.07095
	LPXN	-0.05707
	CDS2	-0.05662
	IVD	-0.04422
	ASF1A	-0.04375
	PARP1P1	-0.03661
	HNRNPA1L3	-0.03109
	TMEM8B	-0.0281
	RAB2A	-0.02654
	ARL8B	-0.02642
	NCOA7	-0.02616
	LIMS1	-0.02152
	VPS37C	-0.01937
	HDAC4	-0.01887
	ETV6	-0.01829
	IQSEC1	-0.00703
	FARP1	-0.00331
	SPPL3	-0.00129
	SPRY2	-0.00071
	SPRY2	-0.00071
