# Supplementary material for: ZMYM3 mutations modulate histone acetylation and cooperate with NOTCH1 mutations in chronic lymphocytic leukemia
Source: Research Square preprint supplement (doi:10.21203/rs.3.rs-7849174/v1), 2025-10-29
Supplement: Supplementary file 2 [file e12110ad6a808f3bb44f50a1.docx]

**SUPPLEMENTARY MATERIAL**

***ZMYM3* mutations modulate histone acetylation and cooperate with *NOTCH1* mutations in chronic lymphocytic leukemia**

*Alberto Rodríguez-Sánchez, Claudia Pérez-Carretero, Luis A. Corchete-Sánchez, Cristina Miguel-García, Sandra Santos-Mínguez, Ángela Villaverde Ramiro, Julio Dávila, Alfonso García Coca, Josefina Galende, Rocío Benito-Sánchez, Ana E. Rodríguez Vicente, Miguel Quijada-Álamo* and Jesús María Hernández Rivas*.*

This section includes:

[**SUPPLEMENTARY METHODS** 2](#_Toc194663598)

[**SUPPLEMENTARY TABLES** 16](#_Toc194663599)

[**SUPPLEMENTARY FIGURES** 20](#_Toc194663600)

* Supplementary Tables S5–S9 are indexed as .txt files.

# **SUPPLEMENTARY METHODS**

**Next-Generation Sequencing (NGS)**

Genomic DNA was isolated from CD19 positive B lymphocytes obtained from peripheral blood or bone marrow of CLL patients. These cells were isolated by magnetically activated cell sorting (MACS) using CD19 MicroBeads (Miltenyi Biotec, Bergisch Gladbach, Germany) following the manufacturer´s instructions. DNA extraction was performed using the AllPrep DNA/RNA Mini Kit (Qiagen #80284, Valencia, CA, USA) and the DNA was preserved at -80ºC in RLT plus buffer. Quantitative and qualitative assessments of the genomic DNA were conducted employing the Qubit dsDNA HS Assay kit (Invitrogen, Life Technologies, Carlsbad, CA, USA) and the TapeStation 4200 system (Agilent Technologies, Santa Clara, CA, USA). The required concentration and quality to ensure optimal sequencing were 25 ng/µl and a DNA Integrity Number (DIN)>6 respectively (as specified in the Illumina/Agilent protocols).

The Agilent SureSelectQXT Target Enrichment system for Illumina Multiplexed Sequencing (Agilent Technologies, Santa Clara, CA, USA) was employed to generate libraries of exonic regions from 54 CLL-related genes, encompassing 682 regions. This panel was previously validated 1–3. The library contains oligonucleotide probes designed to align with *Homo sapiens* reference genomes, specifically hg19 GRCh37 (for panel version v1) and hg38 GRCh38 (for panel version v2). Targeted DNA sequencing libraries were constructed from 50 ng of genomic DNA using the SureSelectQXT Library Prep Kit (G9681B) following manufacturer´s instructions. Tumor DNA was enzymatically fragmented and adapter-tagged to create libraries. Hybridization was performed using biotin-labeled probes specific to the target regions, followed by enrichment employing streptavidin beads. Subsequently, the libraries were amplified, dual-indexed, and pooled for sequencing. The quality of these libraries was evaluated using the 4200 TapeStation (Agilent). Library quantification was conducted using the Qubit 4.0 (ThermoFisher Scientific in Waltham, MA).

To verify mutations detected at low frequencies, PCR amplification-based techniques were employed. For validations, PCR libraries were generated using the Nextera XT DNA Sample Preparation Kit (Illumina) and indexed using the Nextera XT Index Kit (Illumina). Following quality assessment on a Bioanalyzer DNA 1000 chip and purification using Agencourt AMPure XP beads, the indexed libraries were quantified by fluorometry using the Qubit HS dsDNA assay kit. The libraries were then combined for sequencing after being diluted to an equimolar concentration of 4 nM. Prior to denaturing and sequencing, a fluorometric measurement was used as a final validation of the concentration of the pooled library. Sequencing of the pooled genomic libraries was executed on the Illumina NextSeq or MiSeq platform (Ilumina).

To perform raw data quality control, FastQC (v0.11.8) and Picard tools (v2.2.4) were used to compile sequencing metrics. Demultiplexed files (FASTQ) were aligned to the reference genome, followed by identification of read duplicates using SAMTools (v1.3.1). Post-alignment processing was carried out with GATK (v3.5), and coverage analysis for each targeted region was evaluated using BEDTools, (v.2.26.0). The threshold for high-quality sequencing results was set at a minimum quality score of Q30. Finally, an in-house pipeline integrating VarScan (v2.4) for somatic variant calling and ANNOVAR (v.2017Jul16) for annotation was employed for comprehensive variant analysis.

Target regions achieved a median coverage of 600 reads/base, with at least 100X in 97% of them. To confirm variants found with VAF<5% detected in the custom panel, samples were resequenced using the amplicon-based techniques from Illumina Nextera XT, achieving read depths over 1000X. This high coverage allowed for the detection of variants down to 2%, as previously demonstrated by our group 1,2,4.

Mutations were filtered based on their predicted impact, considering variants in the splice sites, untranslated regions (UTRs) and those leading to alterations in the amino acid sequence of the protein (missense, nonsense, and frameshift). Minor allelic frequencies (MAFs) were checked in different databases (dbSNP, 1000 genomes, ExAC, and our in-house database) to exclude single nucleotide polymorphisms (SNPs), with only variations having a MAF<0.01 selected for further investigation. In addition, variants exhibiting a VAF between 40-60% or greater than 90% were manually reviewed. Priority was given to those variants predicted to be deleterious, damaging, pathogenic or likely pathogenic according to *in silico* prediction tools (PolyPhen-2 (Polymorphism Phenotyping v2), SIFT (Sorting Intolerant From Tolerant) and ClinVar).

Variants were annotated using automated workflows, allowing the identification of potential pathogenic variants. Manual review using the Integrated Genomics Viewer (IGV) further validated the variants5. Additionally, ClinVar and the Varsome online tool were used to categorize the variations and assess their pathogenicity6.

**Cell lines and culture conditions**

The CLL-derived HG3 cell line, which harbors del(13q), was purchased from DMSZ (Deuthche Sammlung von Mikroorganismen and Zellkulturen) and incubated at 37ºC with 5% CO2 atmosphere. HG3 cells were cultured in RPMI 1640 medium (Life Technologies, Paisley, UK) supplemented with 15% Fetal Bovine Serum (FBS, Life Technologies), 1% glutaMAX (Life Technologies) and 1% penicillin/streptomycin (Life Technologies). The identity and mutational status of the cell line were verified through NGS analysis in our customized panel.

**Drugs and reagents**

Drugs including venetoclax, A-1331852, acalabrutinib, idelalisib and bendamustine were purchased from Selleckchem (Houston, TX, USA); ibrutinib and duvelisib were obtained from LC laboratories (Woburn, MA, USA) and fludarabine and etoposide from Sigma (St. Louis, MO, USA). These drugs were reconstituted in DMSO obtained from Sigma for experimental use.

**CRISPR/Cas9**

The HG3 cell line, expressing constitutively Cas9 nuclease, was previously established and verified for functional Cas9 activity7. Single guide RNAs (sgRNAs) targeting the specific *loci* of *ZMYM3* and *NOTCH1* genes were selected based on predicted on-target efficiency scores and minimized off-target effects. As a negative control, we designed a sgRNA sequence that does not target the human genome. Detailed sequences are provided in Supplementary Table S3. Subsequently, pLKO5 vectors carrying the respective sgRNAs, were transfected into HG3-Cas9 cells using the Amaxa Nucleofector II system (Lonza, Basel, Switzerland, program T-016). A single-stranded oligodeoxynucleotide (ssODN) for inducing *NOTCH1* p.P2514fs mutation was also transfected for *NOTCH1*-mutated cells. 48 hours following transfection, GFP-positive cells were isolated via sorting with a FACSAria II flow cytometer (BD Biosciences, Franklin Lakes, NJ, USA). Sorted cells were seeded and single-cell clones were expanded and screened. At least three different clones per condition were selected for the functional studies.

**Sequencing of sgRNAs targeting sites**

Genomic DNA isolation was performed using the QIAampDNA Micro Kit (Qiagen, Hilden, Germany) according to manufacturer´s instructions. PCR primers were designed using the Primer Blast tool available from the National Center for Biotechnology information (NCBI) (<https://www.ncbi.nlm.nih.gov/tools/primer-blast/>) to amplify the genomic regions flanking the upstream and downstream sgRNA cleavage sites for each mutation (Supplementary Table S3). Purification of PCR products was carried out for the screening of loss-of-function mutations using the High Pure PCR Product Purification Kit (Roche, Mannheim, Germany). Any resulting indels were verified by Sanger sequencing to confirm their presence at the expected genomic sites. The efficiency of each sgRNA was assessed using the Tracking of Indels by Decomposition (TIDE) software (<https://tide-calculator.nki.nl> ; Netherlands Cancer Institute). Four *ZMYM3*MUT clones with frameshift mutations in *ZMYM3* were selected. Furthermore, three *NOTCH1*MUT and three *ZMYM3*MUT *NOTCH1*MUT clones harboring a deletion of 2 nucleotides (delCT) at the position c.7561_7562 were generated for subsequent analysis.

**RNA-seq data analysis**

RNA-sequencing was performed on HG3 WT (n=3), *ZMYM3*MUT (n=4), *NOTCH1*MUT (n=3) and *ZMYM3*MUT *NOTCH1*MUT (n=3) clones and 10 primary CLL samples from the Salamanca cohort (control, n=5; *ZMYM3*-mutated, n=5) using the TruSeq Stranded mRNA protocol (Illumina). Briefly, the RNA library was prepared using 200 ng of total RNA from each sample and mRNAs were purified using poly-T oligo-attached magnetic beads and subsequently followed a fragmentation step. mRNA fragments were used as templates for first-strand cDNA synthesis by reverse transcription with random hexamers. Upon second-strand cDNA synthesis, double-stranded cDNAs were end-repaired and adenylated at the 3′ ends. Universal adapters were ligated to the cDNA fragments, then the sequencing library of DNA fragments that had adapters on both ends was amplified by PCR and used to produce the clusters that were sequenced in a NextSeq 550 platform (Illumina). Each sample was sequenced in a separate flow cell lane, with a final length of 76 bases.

The quality information of the resulting FASTQ files was checked using the FastQC (v0.11.9)8 and MultiQC (v1.13) tools. Paired-reads were mapped against the GRCh38 version of the human genome using the STAR aligner (v2.7.10a)9 and gene annotations from Ensembl (v85). Gene level counts were obtained from the BAM files through the HTSeq package (v0.11.2)10 in its “union” mode. Low expressed genes across samples were removed so that only those genes with 5 or more assigned reads in at least two samples were considered for subsequent analyses. The resulting count matrix was normalized to the estimated size factors using the DESeq2 (v1.36.0)11 median of ratios method. Differential gene expression analysis was performed using a Wald test implemented in the DESeq2 R package. Genes with a Benjamini-Hochberg adjusted p-value (FDR)<0.05 were considered significant. Gene set enrichment analysis (GSEA) was performed using the clusterProfiler (v4.12.6) package12. Cancer Hallmarks and Reactome gene sets from the Molecular Signatures Database (MSigDB)13, obtained through the msigdbr (v7.5.1)14,15 package, were used as sources of gene sets. Significant pathways (BH-adjusted p-value<0.05) were visualized using ggplot2 (v3.5.1)16. Heatmap of the significantly differentially expressed genes was generated with the ComplexHeatmap package (v2.12.1)17 in R.

**RNA-seq data of CLLmap cohort**

Publicly available transcriptomic data were obtained from a previously published independent cohort18. Specifically, we utilized batch-corrected transcript per million (TPM) values from treatment-naïve samples. To ensure the relevance of our analysis, we selected only samples classified as IGHV-unmutated (n=274). The dataset was directly downloaded and analyzed for deregulated biological processes using Gene Set Enrichment Analysis (GSEA) with gene sets from Reactome.

**ATAC-seq data analysis**

Chromatin accessibility of HG3 WT (n=2), *ZMYM3*MUT (n=3), *NOTCH1*MUT (n=3) and *ZMYM3*MUT *NOTCH1*MUT (n=3) clones were analyzed by ATAC-seq following an established protocol19. ATAC-seq libraries were sequenced on a NovaSeq 6000 System (Illumina). The quality of the raw sequencing reads was checked using FASTQC. Reads were quality trimmed and adapter sequences were removed using Trim Galore (v.0.6.7)20 (<https://www.bioinformatics.babraham.ac.uk/projects/trim_galore/>), considering a minimum quality Phred score cutoff of 20 and a maximum trimming error rate of 0.1. The minimum read length allowed for the survival reads was 30 nt. Reads were aligned against the hg38 Ensembl genome using Bowtie2 (v.2.4.4)21 in its “--very-sensitive” mode, discarding any read pairs that did not align concordantly and setting the maximum fragment length for valid pairs to 2 000 bp. Intermediate SAM and BAM files were transformed, sorted, and indexed using SAMtools (v.1.11)22. Low-quality alignments (MAPQ <30) were removed employing the alignmentSieve tool from the deepTools suite (v.3.5.2)23. Duplicate reads were removed using the MarkDuplicates tool (v.2.18.29) from Picard24. Reads mapped to the mitochondrial chromosome were discarded using SAMtools, and potential cDNA contamination was assessed and removed using cDNA-detector (v. 0.1.0)25. Prior to peak calling, BAM files were transformed to BED format using BEDTools (v.2.30.0)26, and reads were shifted +4 bp for positive and -5 bp for negative strands to correct for strand-specific biases created by the Tn5 transposase. Peak calling was performed using MACS2 (v. 2.2.7.1)27, setting the FDR cutoff for peak calling to 0.01 and setting the shift option to -75 to center all reads to the central point of the transposase binding site. Blacklisted regions (ENCODE, hg38)28 were removed using BEDTools. A consensus peak list was generated using all detected peaks from all samples. GC content in the consensus peaks was calculated using the EaCoN package (v.0.3.6-2)29 in R (v.4.3.2) (R Core Team (2023). R: A language and environment for statistical computing. R Foundation for Statistical Computing, Vienna, Austria. https://www.R-project.org/). The overlapping regions were merged using the mergeBed option from BEDTools. Read counting in the consensus peaks was performed using featureCounts (v.2.0.1)30, specifying the read2pos option to 5, thereby considering only the 5’ most base of each read for summarization. The obtained counts were normalized for GC content using the qsmooth package (v.1.18.0)31 in R. Between-sample library size normalization was performed using a nonlinear full quantile normalization method with the EDASeq package (v.2.36.0)32. BAM files from the same condition were merged for graphical purposes using SAMtools. BigWig files were generated using the bamCoverage option from deepTools on the merged BAM files using CPM as the normalization method and a bin size of 10 nt. Differential peak analysis was performed using the edgeR package (v.4.0.16)33, fitting a generalized linear model (GLM) through the glmQLFit option and performing a likelihood ratio test through the glmQLFTest option. The shared and specific peaks for each condition were finally retrieved using the intersect option from BEDTools. Tornado plots were depicted using the computeMatrix and plotHeatmap tools from deepTools. Peak annotation and motif analysis were performed using HOMER (v4.11.1)34. The size of the region used for motif analysis was set to 200 bp. Genomic regions tracks of ATAC-seq data were generated with SparK (v.2.6.2)35.

**Western blot analysis**

Cells were lysed for 30 minutes on ice with lysis buffer containing 140 mmol/l NaCl, 50 mmol/l EDTA, 10% glycerol, 1% Nonidet P-40, 20 mmol/l TrisHCl pH 7, supplemented with protease (cOmpleteTM, Roche) and phosphatase inhibitors (PhosSTOPTM, Roche). Following centrifugation at 4ºC and 13.200 rpm for 5 minutes, the supernatant containing solubilized proteins was collected. Protein concentration was determined using Pierce™ BCA Protein Assay (Thermo Fisher, Bleiswijk, Netherlands), and samples were loaded onto polyacrylamide gels for electrophoresis under denaturing conditions using sodium dodecyl sulfate (SDS PAGE). Proteins were then transferred onto nitrocellulose membranes (GE Healthcare, Buckinghamshire, UK) and incubated with anti-human antibodies at 1:1 000 dilution. Protein expression levels were evaluated using anti-human antibodies. The following primary antibodies were purchased from Cell Signaling Technologies (Danvers, MA, USA): anti- BCL2 (#2872, Rabbit), anti-MCL1 (#94296, Rabbit), anti-BCL-XL (#2762, Rabbit), anti-BAK (#12105, Rabbit), anti-BAX (#5023, Rabbit), anti-BIM (#2933, Rabbit), anti-NOXA (#14766, Rabbit), anti-PARP1 (#9542, Rabbit), anti-caspase 7 (#12827, Rabbit), anti-caspase 8 (#9746, Mouse), anti-caspase 3 (#14220, Rabbit), anti-NICD (NOTCH1 intracellular domain, #4147, Rabbit), anti-p-ATM (#13050, Rabbit), anti-p-ATR (#2853, Rabbit), anti-p-Chk1 (#2348, Rabbit), anti-p-Chk2 (#2661, Rabbit), anti-β-actin (#4967, Rabbit), anti-GAPDH (#5174, Rabbit) and anti α/β-tubulin (#2148, Rabbit). Anti-ZMYM3 was purchased from ProteinTech (Rosemont, IL, USA) (#25742, Rabbit). The secondary anti-mouse (#7076) and anti-rabbit (#7074) antibodies, linked with horseradish peroxidase, were acquired from Cell Signaling Technologies. Antibody signal was detected with ECLTM Western Blotting Detection Reagents (GE Healthcare) and SuperSignal™ West Femto Maximum Sensitivity Substrate (ThermoFisher). Western blot quantification was performed using ImageJ (Fiji) software. The intensity of the anti-apoptotic proteins was normalized to GAPDH as loading control, and the data were expressed as relative protein levels. Quantifications were performed in duplicate for each sample.

**Cell viability and growth assays in CRISPR/Cas9-edited CLL cells**

Cell viability was assessed using 3-(4,5-dimethylthiazol-2-yl)-2,5-diphenyltetrazolium bromide (MTT) colorimetric test (Sigma-Aldrich). Cells were seeded at a density of 1 x 104 cells/well (for 72h experiments) in 96-well plates, and treated with A-1331852 or vehicle (DMSO). Following treatment, cells were incubated with a 1:10 MTT solution for 2 hours and subsequently 1:2 SDS-HCl was added while plates were agitated for another 6 hours. Absorbance at 570 nm was measured using an Infinite® F500 Tecan plate reader (Tecan, Männedorf, Switzerland).

**Apoptosis and cell cycle analysis**

Apoptosis was analyzed by flow cytometry using annexin V- FITC (Immunostep, Salamanca, Spain) staining according to manufacturer´s instructions. Briefly, 2.5 x 105 cells were seeded in 24-well plates and treated for 48 hours with fludarabine and etoposide. After treatment, cells were collected and stained with annexin V and propidium iodide (PI). Cell cycle profile was measured by PI labeling, dye that binds stoichiometrically to DNA. Cells were acquired with the appropriate template and calibration using a FACScalibur cytometer.

**Immunofluorescence**

3 x 105 cells were irradiated with a dose of 2 Gy (Gray) using a Gammacell 1000 Elite irradiator. At least 2 independent clones per condition (WT, *ZMYM3*-mutated) were analyzed. Following irradiation, cells were incubated at 37ºC for 6 hours to allow for cellular responses. Subsequently, 5 x 104 cells were fixed with 2% paraformaldehyde and permeabilized with 0.2% of Triton-X100. After blocking of nonspecific binding sites with 1% bovine serum albumin (BSA), cells were incubated with primary antibodies against γH2AX (Milipore, Wicklow, Ireland) (#05-636, Mouse), RAD51 (Milipore, #PC130, Rabbit), TP53BP1 (Cell Signaling Technologies, #88439, Rabbit) and BRCA1 (Santa Cruz Biotech, Dallas, TX, USA) (#SC6954, Mouse) at 1:1 000 dilution for 2 hours. Cells were then incubated with the secondary antibodies Cy™5 Goat Anti-Mouse or Cy™3 Goat Anti-Rabbit (Jackson Immunoresearch, Cambridgeshire, UK) at a 1:1 000 dilution for 1 hour. Following antibody incubation, cells were washed twice with PBS and slides were mounted with Vectashield reagent (Vector Laboratories, Newark, CA, USA). Images were acquired using a Leica TCS SP5DMI-6000B confocal microscope (Leica, Wetzlar, Germany) and analyzed and quantified with Leica LAS AF (Leica) and ImageJ software.

**Histone acetylation assay**

Global levels of histone H3 and H4 acetylation were measured using the Histone H3 and H4 Acetylation Assay Kit (abcam, Cambridge, UK) (#ab115102 and #ab115103) according to the manufacturer´s instructions. Briefly, 2 µg of histones were extracted from 2 x 106 CRISPR/Cas9-edited cells and 1 × 107 primary cells using the provided Abcam Lysis Buffer and immobilized in strip wells. Histone acetylation was quantified by measuring absorbance at 450 nm after 1 hour of incubation with the capture antibody specific for acetylated histone H3 or H4.

**CFSE staining**

To investigate the proliferative capacity of CLL cells, CFSE (carboxyfluorescein diacetate succinimidyl ester) dye (ThermoFisher Scientific, #C34554) was employed. Briefly, 1 × 106 cells were incubated for 10 min at 37ºC with CFSE 5 μM and resuspended in RPMI medium with 10% FBS. Cell proliferation was monitored for 4 days by flow cytometry using a FACSCalibur instrument.

**Digital droplet PCR (ddPCR)**

Purified RNA extracted from CRISPR/Cas9 cells and primary cells was subjected to reverse transcription to generate complementary DNA (cDNA) using the SuperScript™ III First-Strand Synthesis SuperMix for qRT-PCR (Invitrogen, Carlsbad, CA, USA) (#11752050). The resulting cDNA was appropriately diluted and stored at -20ºC until further use. TaqmanTM assays (ThermoFisher Scientific) were utilized for the investigation of specific genes: caspase-8 (Hs06630780), caspase-7 (Hs00169152) and caspase-3 (Hs00234387). The *ABL1* gene served as the reference gene (Hs01104728). For each assay, the target gene and *ABL1* reference gene were amplified in multiplex using FAM and VIC labels respectively. Reactions were prepared utilizing the ddPCR™ Supermix (BioRad, Hercules, CA, USA) (#1863010) for DNA and probes according to the manufacturer´s guidelines. Droplets were generated from the reactions using Droplet Generation Oil for Probes (BioRad) on the QX100 Droplet Generator (BioRad) following the manufacturer’s protocol. Subsequently, droplets underwent 40 cycles of thermal cycling on the C1000 Touch (BioRad). The resulting droplets were read using the QX100 Droplet Reader (BioRad). Data were analyzed in QuantaSoft software (BioRad). All samples exhibited droplet counts >12 000 droplets. The concentration of each RNA species and ratio of gene of interest/reference gene concentration was calculated using QuantaSoft for each sample. Each DNA sample’s average ratio was used to compare control and *ZMYM3*MUT samples using a Student’s t-test.

**REFERENCES**

1. Pérez-Carretero, C. *et al.* TRAF3 alterations are frequent in del-3’IGH chronic lymphocytic leukemia patients and define a specific subgroup with adverse clinical features. *Am. J. Hematol.* **97**, 903–914 (2022).

2. Pérez-Carretero, C. *et al.* Chronic lymphocytic leukemia patients with IGH translocations are characterized by a distinct genetic landscape with prognostic implications. *Int. J. Cancer* **147**, 2780–2792 (2020).

3. Hernández-Sánchez, M. *et al.* DNA damage response-related alterations define the genetic background of patients with chronic lymphocytic leukemia and chromosomal gains. *Exp. Hematol.* **72**, 9–13 (2019).

4. Quijada-Álamo, M. *et al.* Next-generation sequencing and FISH studies reveal the appearance of gene mutations and chromosomal abnormalities in hematopoietic progenitors in chronic lymphocytic leukemia. *J. Hematol. Oncol.* **10**, 1–11 (2017).

5. Robinson, J. T., Thorvaldsdóttir, H., Wenger, A. M., Zehir, A. & Mesirov, J. P. Variant review with the integrative genomics viewer. *Cancer Res.* **77**, e31–e34 (2017).

6. Kopanos, C. *et al.* VarSome: the human genomic variant search engine. *Bioinformatics* **35**, 1978–1980 (2019).

7. Quijada-Álamo, M. *et al.* CRISPR/Cas9-generated models uncover therapeutic vulnerabilities of del(11q) CLL cells to dual BCR and PARP inhibition. *Leukemia* **34**, 1599–1612 (2020).

8. Babraham Bioinformatics - FastQC A Quality Control tool for High Throughput Sequence Data. https://www.bioinformatics.babraham.ac.uk/projects/fastqc/.

9. Dobin, A. *et al.* STAR: Ultrafast universal RNA-seq aligner. *Bioinformatics* **29**, 15–21 (2013).

10. Putri, G. H., Anders, S., Pyl, P. T., Pimanda, J. E. & Zanini, F. Analysing high-throughput sequencing data in Python with HTSeq 2.0. *Bioinformatics* **38**, 2943–2945 (2022).

11. Love, M. I., Huber, W. & Anders, S. Moderated estimation of fold change and dispersion for RNA-seq data with DESeq2. *Genome Biol.* **15**, 1–21 (2014).

12. Yu, G., Wang, L. G., Han, Y. & He, Q. Y. ClusterProfiler: An R package for comparing biological themes among gene clusters. *Omi. A J. Integr. Biol.* **16**, 284–287 (2012).

13. Liberzon, A. *et al.* The Molecular Signatures Database Hallmark Gene Set Collection. *Cell Syst.* **1**, 417–425 (2015).

14. MSigDB gene sets R package • msigdbr. https://igordot.github.io/msigdbr/.

15. Package “msigdbr” Title MSigDB Gene Sets for Multiple Organisms in a Tidy Data Format. (2025) doi:10.1073/pnas.0506580102.

16. Wickham, H. *Ggplot2: Elegant Graphics for Data Analysis. Springer-Verlag New York*. *Media* vol. 35 (2016).

17. Gu, Z., Eils, R. & Schlesner, M. Complex heatmaps reveal patterns and correlations in multidimensional genomic data. *Bioinformatics* **32**, 2847–2849 (2016).

18. Knisbacher, B. A. *et al.* Molecular map of chronic lymphocytic leukemia and its impact on outcome. *Nat. Genet.* **54**, 1664–1674 (2022).

19. Buenrostro, J. D., Wu, B., Chang, H. Y. & Greenleaf, W. J. ATAC-seq: A method for assaying chromatin accessibility genome-wide. *Curr. Protoc. Mol. Biol.* **2015**, 21.29.1-21.29.9 (2015).

20. Martin, M. Cutadapt removes adapter sequences from high-throughput sequencing reads. *EMBnet.journal* **17**, 10–12 (2011).

21. Langmead, B. & Salzberg, S. L. Fast gapped-read alignment with Bowtie 2. *Nat. Methods* **9**, 357–359 (2012).

22. Danecek, P. *et al.* Twelve years of SAMtools and BCFtools. *Gigascience* **10**, 1–4 (2021).

23. Ramírez, F. *et al.* deepTools2: a next generation web server for deep-sequencing data analysis. *Nucleic Acids Res.* **44**, W160–W165 (2016).

24. Picard Tools - By Broad Institute. https://broadinstitute.github.io/picard/.

25. Qi, M., Nayar, U., Ludwig, L. S., Wagle, N. & Rheinbay, E. cDNA-detector: detection and removal of cDNA contamination in DNA sequencing libraries. *BMC Bioinformatics* **22**, 1–14 (2021).

26. Quinlan, A. R. & Hall, I. M. BEDTools: A flexible suite of utilities for comparing genomic features. *Bioinformatics* **26**, 841–842 (2010).

27. Zhang, Y. *et al.* Model-based analysis of ChIP-Seq (MACS). *Genome Biol.* **9**, (2008).

28. Luo, Y. *et al.* New developments on the Encyclopedia of DNA Elements (ENCODE) data portal. *Nucleic Acids Res.* **48**, D882–D889 (2020).

29. GitHub - gustaveroussy/EaCoN: Easy Copy Number ! https://github.com/gustaveroussy/EaCoN.

30. Liao, Y., Smyth, G. K. & Shi, W. FeatureCounts: An efficient general purpose program for assigning sequence reads to genomic features. *Bioinformatics* **30**, 923–930 (2014).

31. Hicks, S. C. *et al.* Smooth quantile normalization. *Biostatistics* **19**, 185–198 (2018).

32. Risso, D., Schwartz, K., Sherlock, G. & Dudoit, S. GC-Content Normalization for RNA-Seq Data. *BMC Bioinformatics* **12**, 480 (2011).

33. Chen, Y., Chen, L., Lun, A. T. L., Baldoni, P. L. & Smyth, G. K. edgeR 4.0: powerful differential analysis of sequencing data with expanded functionality and improved support for small counts and larger datasets. *bioRxiv* 2024.01.21.576131 (2024).

34. Heinz, S. *et al.* Simple Combinations of Lineage-Determining Transcription Factors Prime cis-Regulatory Elements Required for Macrophage and B Cell Identities. *Mol. Cell* **38**, 576–589 (2010).

35. Kurtenbach, S. & Harbour, J. W. SparK: A Publication-quality NGS Visualization Tool. *bioRxiv* 1–4 (2019) doi:10.1101/845529.

# **SUPPLEMENTARY TABLES**

**Supplementary Table S1:** Clinical and biological characteristics of CLL patients from the Salamanca Hospital according to *ZMYM3* mutational status (N=409).

|  | ***ZMYM3*WT (n=380)** | ***ZMYM3*MUT (n=29)** | **P-value** | **Statistical test** |
| --- | --- | --- | --- | --- |
| **Median age at diagnosis, years (range)** | 72 (37-107) | 72 (48-93) | 0.936 | Mann-Whitney U test |
| **Gender male, %** | 65.9 | 51.7 | 0.111 | χ2 test |
| **Binet B or C, %** | 26.1 | 23.1 | 0.468 | χ2 test |
| **Median leukocytes count, (range)** | 18.5 (2.3-369) | 17.0 (7.4-53.5) | 0.518 | Mann-Whitney U test |
| **Median lymphocytes count, (range)** | 13.3 (0.6-7500) | 12.3 (3.2-232.2) | 0.634 | Mann-Whitney U test |
| **Median platelet count, (range)** | 188.0 (2-2000) | 204.0 (20.4-456.0) | 0.749 | Mann-Whitney U test |
| **Median hemoglobin level, (range)** | 14.1(6.0-18.9) | 13.8 (7.6-16.1) | 0.626 | Mann-Whitney U test |
| **High β2-microglobulin level, %** | 40.7 | 47.1 | 0.816 | χ2 test |
| **High LDH level, %** | 20.5 | 23.8 | 0.447 | χ2 test |
| **Hepatomegaly, %** | 4.9 | 4.8 | 0.728 | χ2 test |
| **Splenomegaly, %** | 18.7 | 22.7 | 0.406 | χ2 test |
| **B symptoms, %** | 9.1 | 10 | 0.568 | χ2 test |
| **Need for treatment, %** | **54.4** | **79.3** | **0.007** | **χ2 test** |
| **Adenopathies, %** | 41.2 | 50.0 | 0.677 | χ2 test |
| **IGHV unmutated, %** | **49.2** | **76.2** | **0.014** | **χ2 test** |
| **13q deletion, %** | 49.2 | 48.3 | 0.968 | χ2 test |
| **Trisomy 12, %** | 31.4 | 37.9 | 0.297 | χ2 test |
| **17p deletion, %** | 14.7 | 13.8 | 0.579 | χ2 test |
| **11q deletion, %** | 8.7 | 13.8 | 0.262 | χ2 test |

**Supplementary Table S2:** Coverage metrics for genomic regions within the custom NGS panel of CLL-related genes.

| **Gene** | **Transcript** | **Regions** | **Mean coverage (reads/base)** |
| --- | --- | --- | --- |
| ***ARID1A*** | ENST00000324856 | Exons 1-20 | 814 |
| ***ASXL1*** | ENST00000375687 | Exons 1-13 | 701 |
| ***ATM*** | ENST00000278616 | Exons 2-63 | 456 |
| ***ATRX*** | ENST00000373344 | Exons 1-35 | 243 |
| ***BAX*** | ENST00000345358 | Exon 2-6 | 826 |
| ***BAZ2A*** | ENST00000551812 | Exons 2-28 | 819 |
| ***BCL2*** | ENST00000333681 | Exons 2-3 and 5'UTR | 536 |
| ***BCOR*** | ENST00000378444 | Exons 2-15 | 398 |
| ***BIRC3*** | ENST00000263464 | Exons 2-9 | 483 |
| ***BRAF*** | ENST00000288602 | Exons 11-16 | 499 |
| ***BTK*** | ENST00000308731 | Exons 2-19 | 456 |
| ***CARD11*** | ENST00000396946 | Exons 3-17 | 795 |
| ***CCND2*** | ENST00000261254 | Exons 1-5 | 827 |
| ***CD19*** | ENST00000324662 | Exons 1-6 | 845 |
| ***CDC73*** | ENST00000367435 | Exons 1-16 | 436 |
| ***CHD2*** | ENST00000394196 | Exons 2-39 | 463 |
| ***DDX3X*** | ENST00000399959 | Exons 1-16 | 376 |
| ***EGR2*** | ENST00000242480 | Exons 1-2 | 1021 |
| ***FAM50A*** | ENST00000393600 | Exons 2-12 | 478 |
| ***FAT1*** | ENST00000441802 | Exons 2-27 | 754 |
| ***FBXW7*** | ENST00000281708 | Exons 7-12 | 721 |
| ***FUBP1*** | ENST00000370768 | Exons 1-19 | 451 |
| ***HIST1H1B*** | ENST00000331442 | Exon 1 | 954 |
| ***HIST1H1E*** | ENST00000304218 | Exon 1 | 668 |
| ***IGLL5*** | ENST00000526893 | Exons 1-3, 5'UTR | 555 |
| ***IKZF3*** | ENST00000346872 | Exon 5 | 696 |
| ***IRF4*** | ENST00000380956 | Exons 2-9 | 698 |
| ***KLHL6*** | ENST00000341319 | Exons 1-7 | 693 |
| ***KRAS*** | ENST00000311936 | Exons 2-5 | 543 |
| ***MAP2K1*** | ENST00000307102 | Exons 1-11 | 561 |
| ***MED12*** | ENST00000374080 | Exons 1-4 | 389 |
| ***MGA*** | ENST00000570161 | Exons 2-23 | 572 |
| ***MYD88*** | ENST00000396334 | Exons 2-5 | 781 |
| ***NFKBIE*** | ENST00000275015 | Exons 1-2 | 969 |
| ***NOTCH1*** | ENST00000277541 | Exon 34 and 3'UTR | 1208 |
| ***NRAS*** | ENST00000369535 | Exons 2-3 | 587 |
| ***NXF1*** | ENST00000294172 | Exons 3-21 | 653 |
| ***PAX5*** | ENST00000358127 | Enhancer | 791 |
| ***PCDH10*** | ENST00000264360 | Exons 1-5 | 562 |
| ***PIK3CD*** | ENST00000377346 | Exons 3-24 | 848 |
| ***PLCG2*** | ENST00000564138 | Exons 2-33 | 618 |
| ***POT1*** | ENST00000357628 | Exons 5-19 | 405 |
| ***PTPN11*** | ENST00000351677 | Exons 2-15 | 645 |
| ***RPS15*** | ENST00000593052 | Exons 2-4 | 679 |
| ***SAMHD1*** | ENST00000262878 | Exons 1-16 | 465 |
| ***SETD2*** | ENST00000409792 | Exons 1-21 | 476 |
| ***SF3B1*** | ENST00000335508 | Exons 14-16 | 524 |
| ***SORCS2*** | ENST00000507866 | Exons 1-27 | 876 |
| ***TP53*** | ENST00000269305 | Exons 4-10 | 634 |
| ***TRAF3*** | ENST00000392745 | Exons 1-12 | 641 |
| ***XPO1*** | ENST00000401558 | Exons 15-16 | 556 |
| ***ZC3H18*** | ENST00000301011 | Exons 2-18 | 780 |
| ***ZMYM3*** | ENST00000373998 | Exons 2-25 | 507 |
| ***ZNF292*** | ENST00000339907 | Exons 1-8 | 401 |

**Supplementary Table S3**: Sequences of sgRNAs and primers for generation of CRISPR/Cas9-edited CLL cells.

| **Target** | **Forward (5´-3´)** | **Reverse (5´-3´)** |
| --- | --- | --- |
| ***ZMYM3* exon 2 sgRNA1** | CACCG**GCTGGCCTGGAAAAAGACCC** | AAAC**GGGTCTTTTTCCAGGCCAGC**C |
| ***ZMYM3* exon 2 sgRNA2** | CACCG**GGCCAGCAGGGGAGCTATC** | AAAC**GCTTGATACCCCTGCTGGCC**C |
| ***NOTCH1* exon 34 sgRNA1** | CACCG**TGGTCAGGGGACTCAGGGGA** | AAAC**TCCCCTGAGTCCCCTGACCA**C |
| ***NOTCH1* exon 34 sgRNA2** | CACCG**CCACTGGTCAGGGGACTCAG** | AAAC**CTGAGTCCCCTGACCAGTGG**C |
| **Control sgRNA1** | CACCG**ACGGAGGCTAAGCGTCGCAA** | AAAC**TTGCGACGCTTAGCCTCCGT**C |
|  |  |  |
| **Primer 1 *ZMYM3* exon2 (PCR)** | AGTGGATGATGGGGTGTGTC | GTAGCCCCTCAGGTGAACAG |
| **Primer 2 *ZMYM3* exon2 (PCR)** | GCTAAGACCACCTCTACTGCC | TGGGGACTGCAGTGTTATTGG |
| **Primer 1 *NOTCH1* exon34 (PCR)** | TGCACACTATTCTGCCCCAG | AAAAAGGCTCCTCTGGTCGG |
| **Primer 2 *NOTCH1* exon34 (PCR)** | GAGCTTCCTGAGTGGAGAGC | CCGAAGGCTTGGGAAAGGAA |

| ***NOTCH1* exon34 ssODN** | TGGAGACGCCCTCGGACCAGTCGGAGACGTTGGAATGCGGGGACGAG  CTGGACCACTGGTCAGGGGACTCGGGACGGGGTGAGGAAGGGGTGCT  CAGGCACCTGTAGCTGG |
| --- | --- |

**Supplementary Table S4**: PCR primers used in ATAC-seq protocol.

|  | **Sequence (5´-3´)** |
| --- | --- |
| **Primer 1** | AATGATACGGCGACCACCGAGATCTACACTCGTCGGCAGCGTCAGATGTG |
| **Primer 2 WT #1** | CAAGCAGAAGACGGCATACGAGATTGCCTCTTGTCTCGTGGGCTCGGAGATGT |
| **Primer 2 WT #2** | CAAGCAGAAGACGGCATACGAGATTCGCCTTAGTCTCGTGGGCTCGGAGATGT |
| **Primer 2 WT #3** | CAAGCAGAAGACGGCATACGAGATCTAGTACGGTCTCGTGGGCTCGGAGATGT |
| **Primer 2 *ZMYM3*MUT #1** | CAAGCAGAAGACGGCATACGAGATTTCTGCCTGTCTCGTGGGCTCGGAGATGT |
| **Primer 2 *ZMYM3*MUT #2** | CAAGCAGAAGACGGCATACGAGATGCTCAGGAGTCTCGTGGGCTCGGAGATGT |
| **Primer 2 *ZMYM3*MUT #3** | CAAGCAGAAGACGGCATACGAGATTCCTCTACGTCTCGTGGGCTCGGAGATGT |
| **Primer 2 *NOTCH1*MUT #1** | CAAGCAGAAGACGGCATACGAGATAGGAGTCCGTCTCGTGGGCTCGGAGATGT |
| **Primer 2 *NOTCH1*MUT #2** | CAAGCAGAAGACGGCATACGAGATCATGCCTAGTCTCGTGGGCTCGGAGATGT |
| **Primer 2 *NOTCH1*MUT #3** | CAAGCAGAAGACGGCATACGAGATGTAGAGAGGTCTCGTGGGCTCGGAGATGT |
| **Primer 2 *ZMYM3*MUT *NOTCH1*MUT #1** | CAAGCAGAAGACGGCATACGAGATCCTCTCTGGTCTCGTGGGCTCGGAGATGT |
| **Primer 2 *ZMYM3*MUT *NOTCH1*MUT #2** | CAAGCAGAAGACGGCATACGAGATAGCGTAGCGTCTCGTGGGCTCGGAGATGT |
| **Primer 2 *ZMYM3*MUT *NOTCH1*MUT #3** | CAAGCAGAAGACGGCATACGAGATCAGCCTCGGTCTCGTGGGCTCGGAGATGT |

# **SUPPLEMENTARY FIGURES**


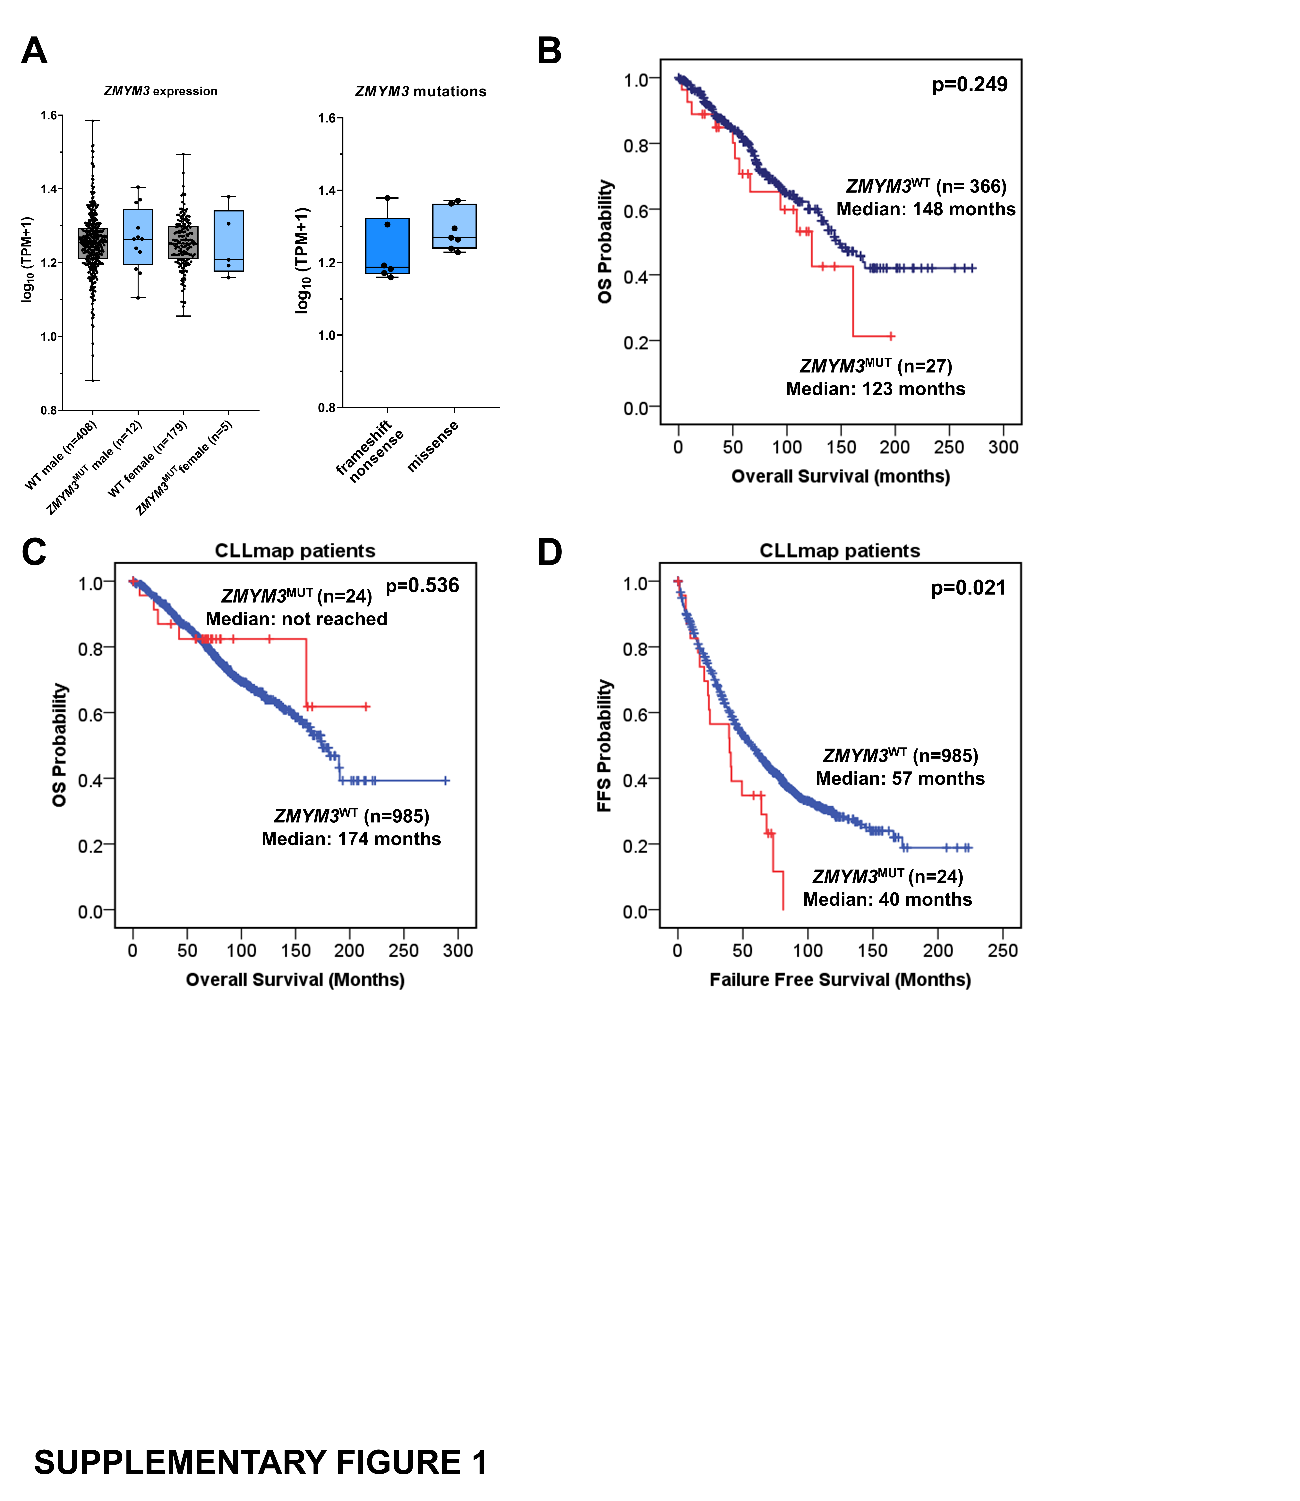


**Supplementary Figure 1**. **Clinical impact of *ZMYM3* mutations.**

**A**.*ZMYM3* mRNA expression levels in CLL patients from the CLLmap cohort, analyzed based on patient gender and *ZMYM3* mutational status (wild-type *vs* mutated) (**left**). Additionally, *ZMYM3* expression is compared according to the type of mutation detected, categorized into frameshift/nonsense *vs* missense variants (**right**).

**B.** Kaplan-Meier curve depicting overall survival (OS) in CLL patients from the Salamanca cohort, stratified by the presence and absence of *ZMYM3* mutations.

**(C-D).** Kaplan-Meier curves representing OS (**C**) and failure free survival (FFS) (**D**) for patients from the CLLmap cohort according to *ZMYM3* mutational status.


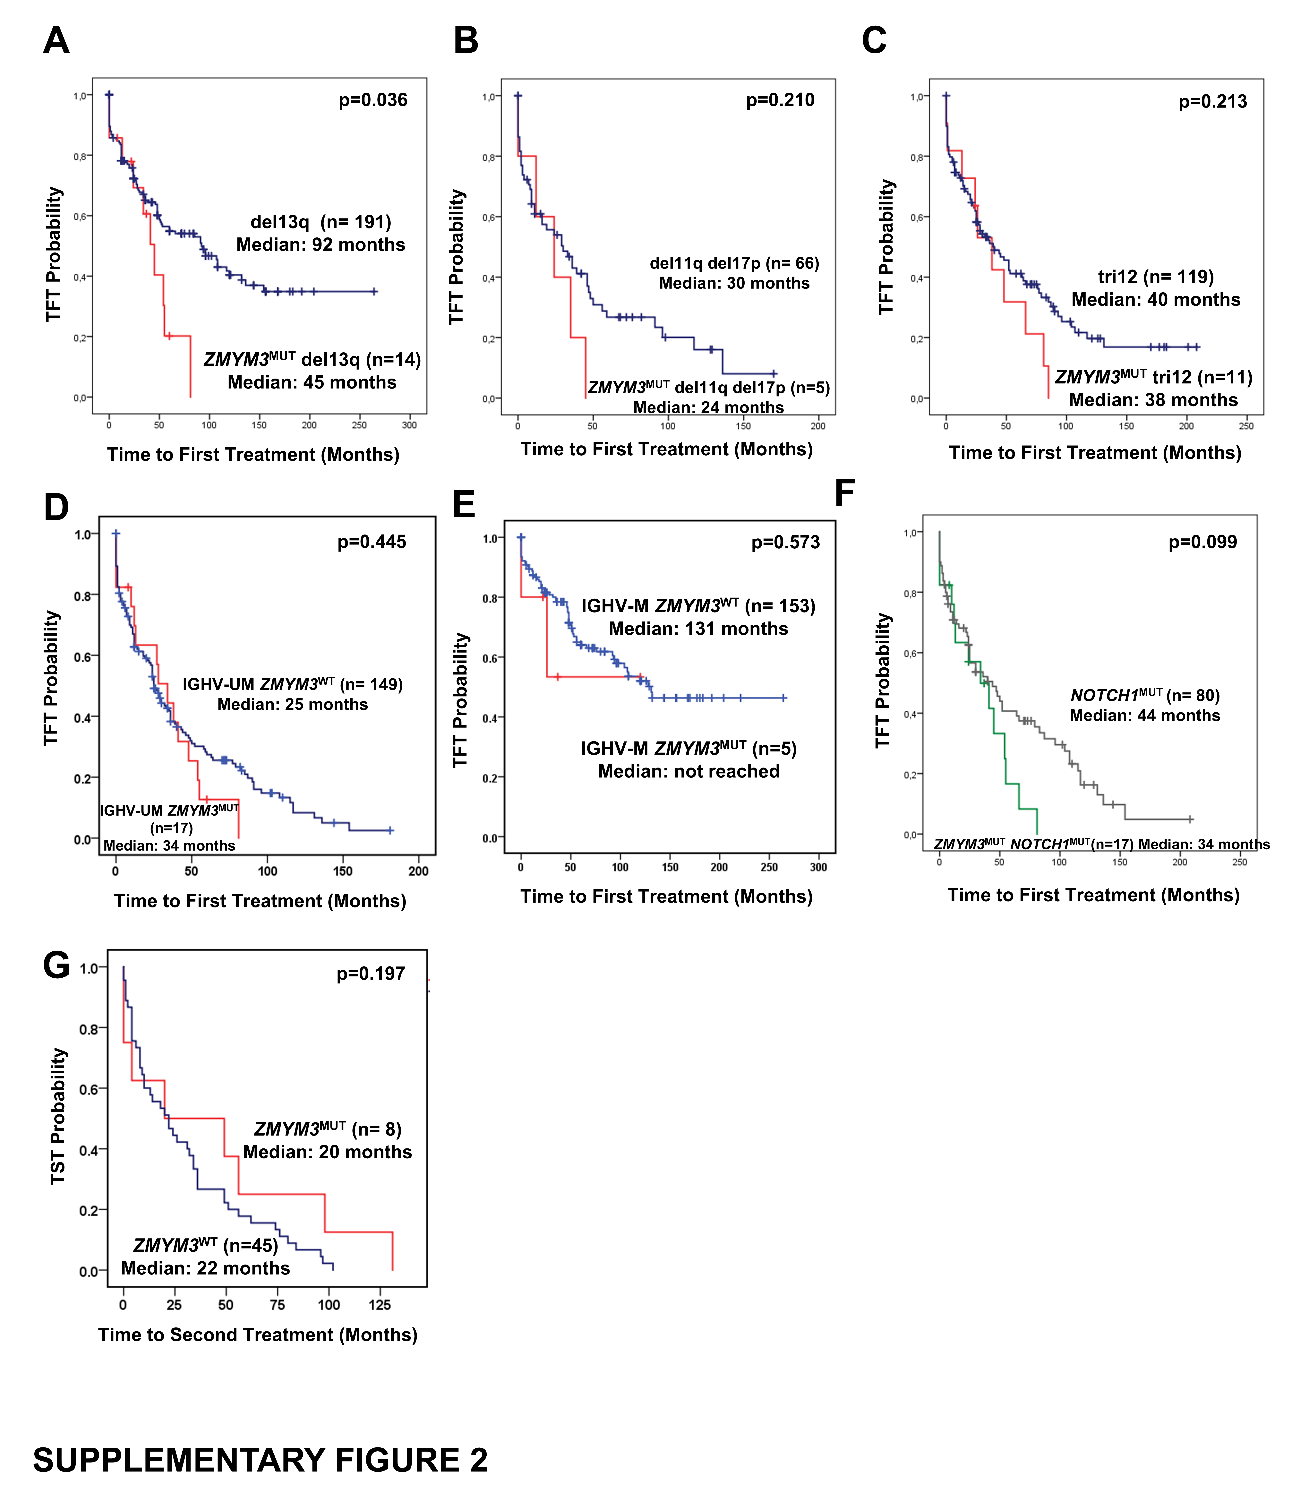


**Supplementary Figure 2. Impact on time to first treatment (TFT) of *ZMYM3* mutations.**

Kaplan Meier curves for time to first treatment (TFT) for CLL patients from the Salamanca cohort according to *ZMYM3* mutational status within specific cytogenetic and molecular subgroups:

**A.** Patients with 13q deletion (del(13q)).

**B.** Patients with 11q deletion (del(11q)) and 17p deletion (del(17p)).

**C.** Patients with trisomy 12.

**D.** Patients with unmutated IGHV (IGHV-UM).

**E.** Patients with mutated IGHV (IGHV-M).

**F.** Patients harboring *NOTCH1* mutations (*NOTCH1*MUT).

**G.** Kaplan-Meier survival curve for time to second treatment (TST) in patients who received a first-line therapy, comparing those with and without *ZMYM3* mutations.


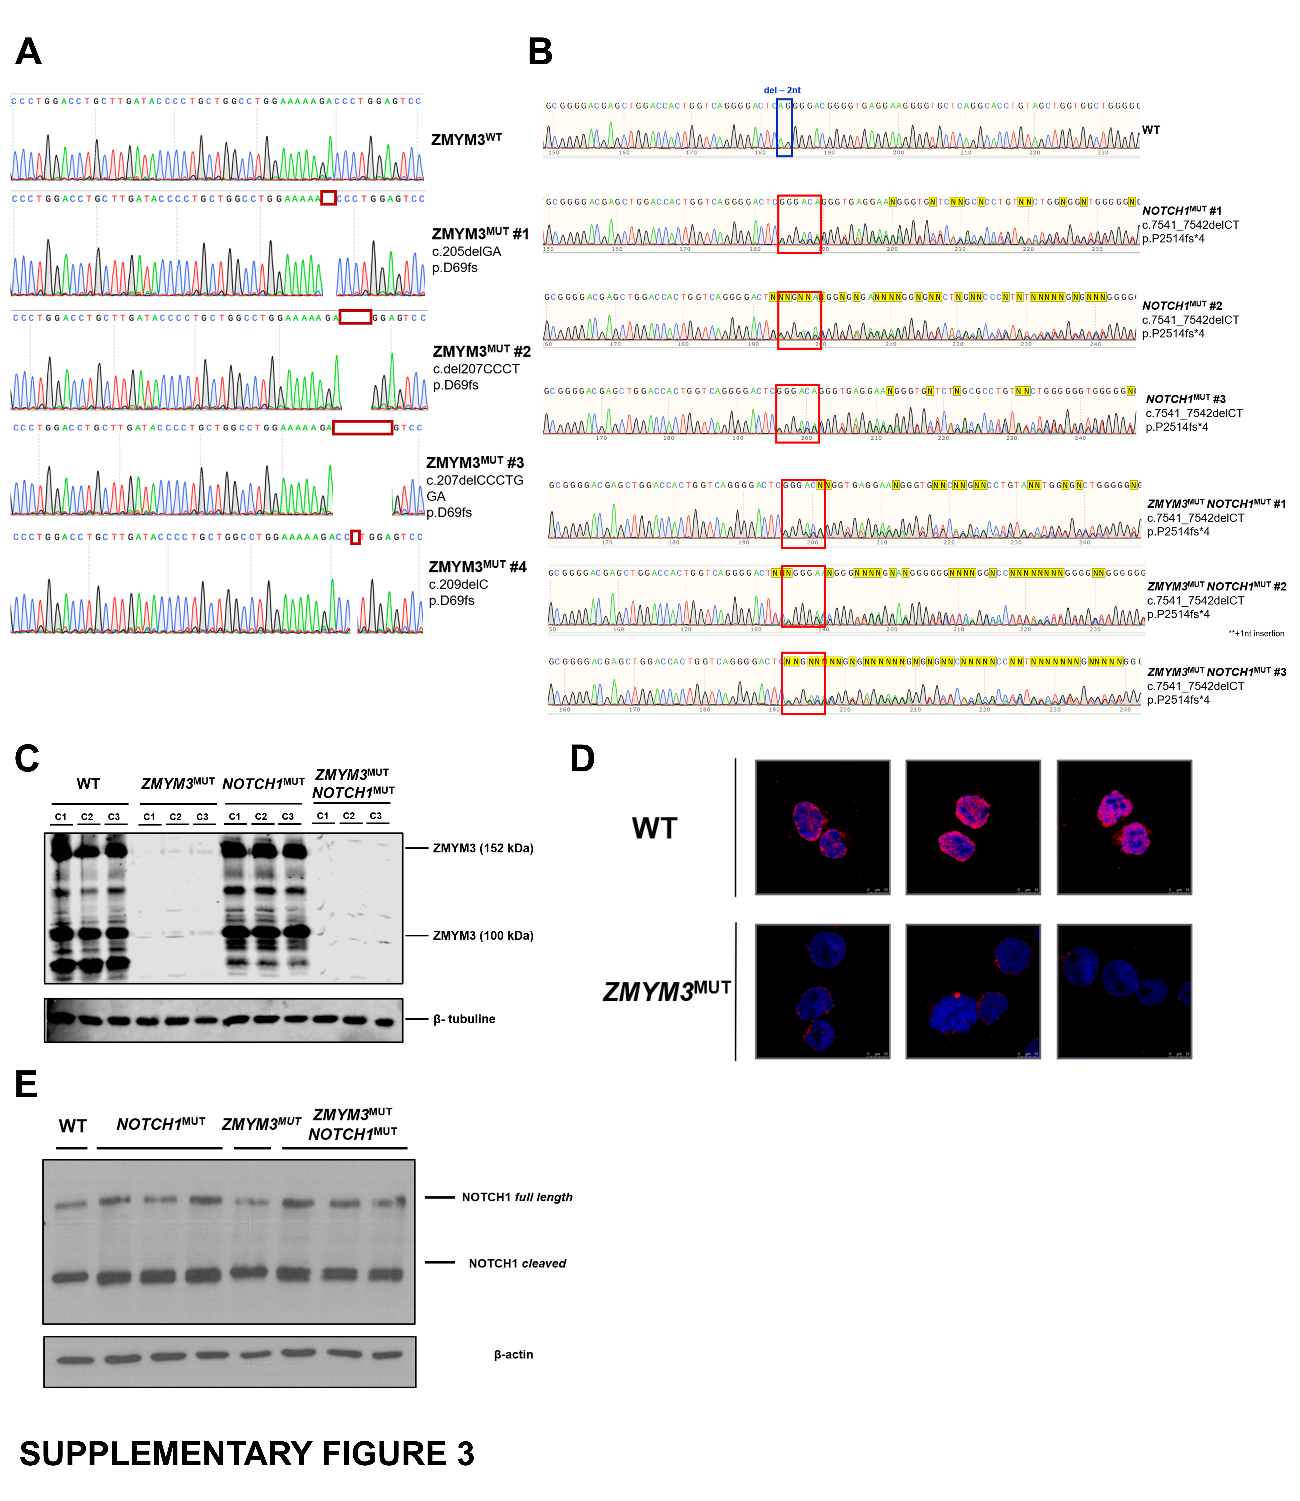


**Supplementary Figure 3. Validation of CRISPR/Cas9-edited CLL cells.**

**A.** Sanger sequencing results confirming the successful introduction of frameshift mutations in *ZMYM3*MUT clones (n=4) at position p.D69fs.

**B.** Sanger sequencing validation showing the CT deletion at position 7541 (p.P2514fs) in *NOTCH1*MUT clones (n=3) and *ZMYM3*MUT *NOTCH1*MUT clones (n=3).

**C.** Western blot analyses illustrating the expression levels of ZMYM3 protein, indicating successful editing.

**D.** Immunofluorescence analysis confirming the absence of ZMYM3 protein in *ZMYM3*MUT cells and demonstrating its nuclear localization in WT cells.

**E.** Western blot analyses verifying increased levels of NOTCH1 cleaved.


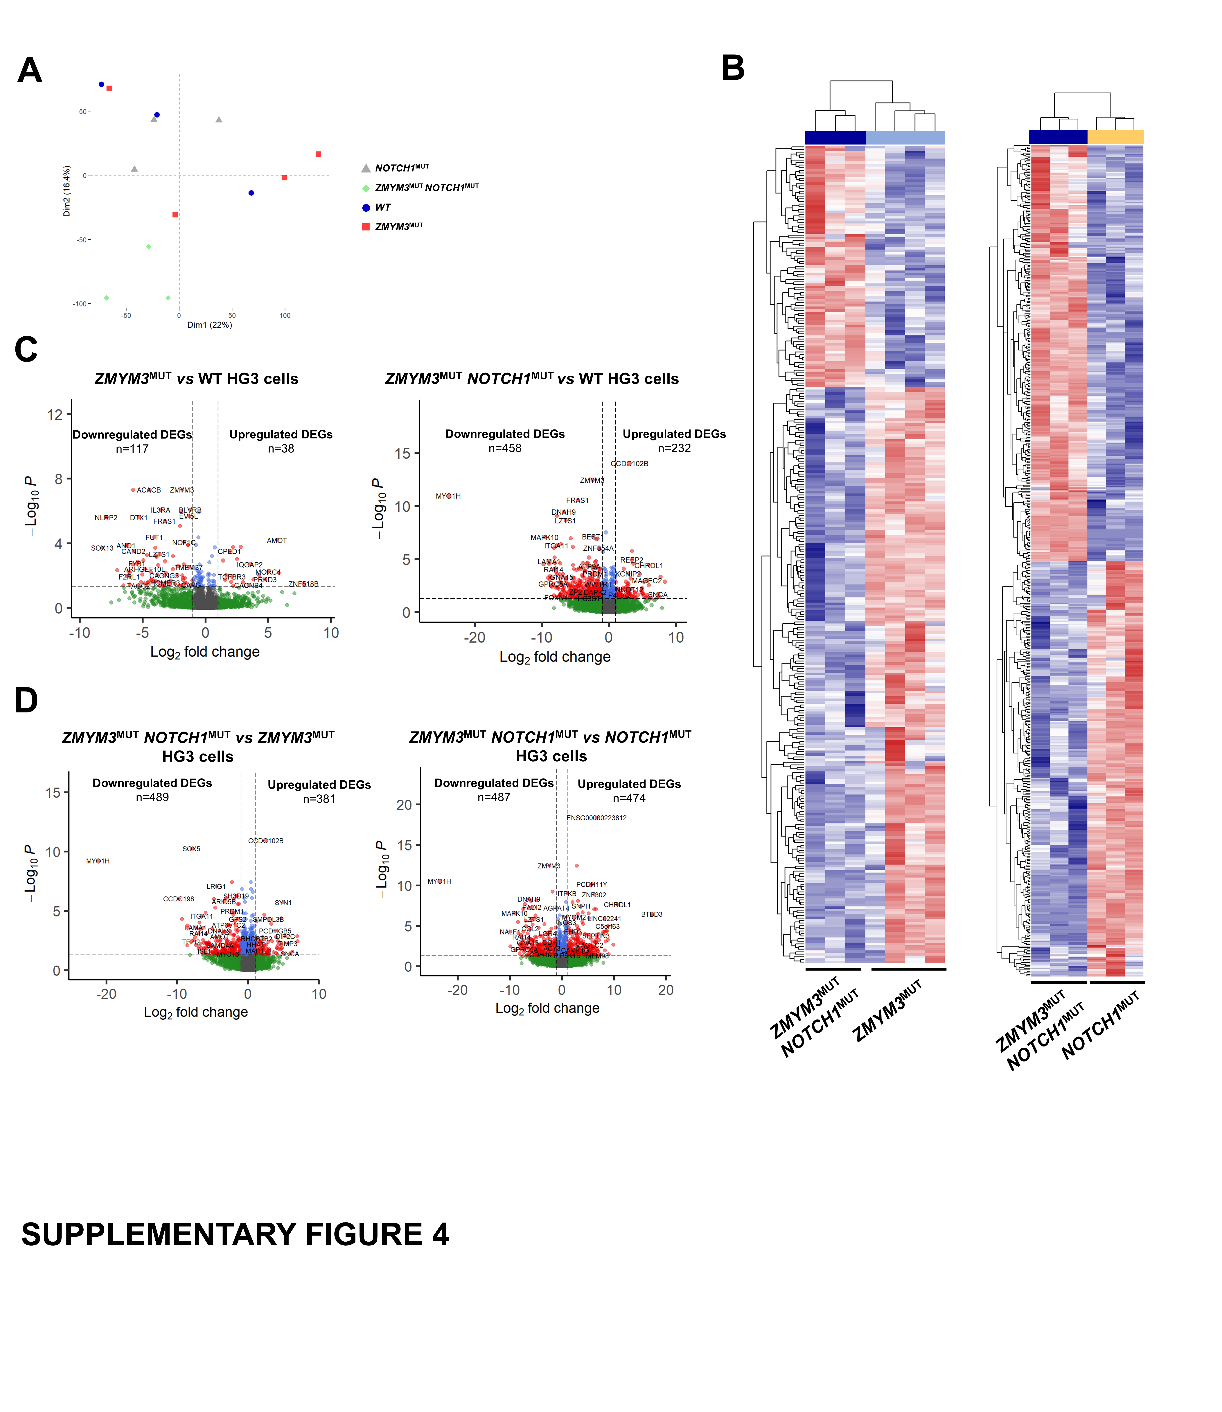
**
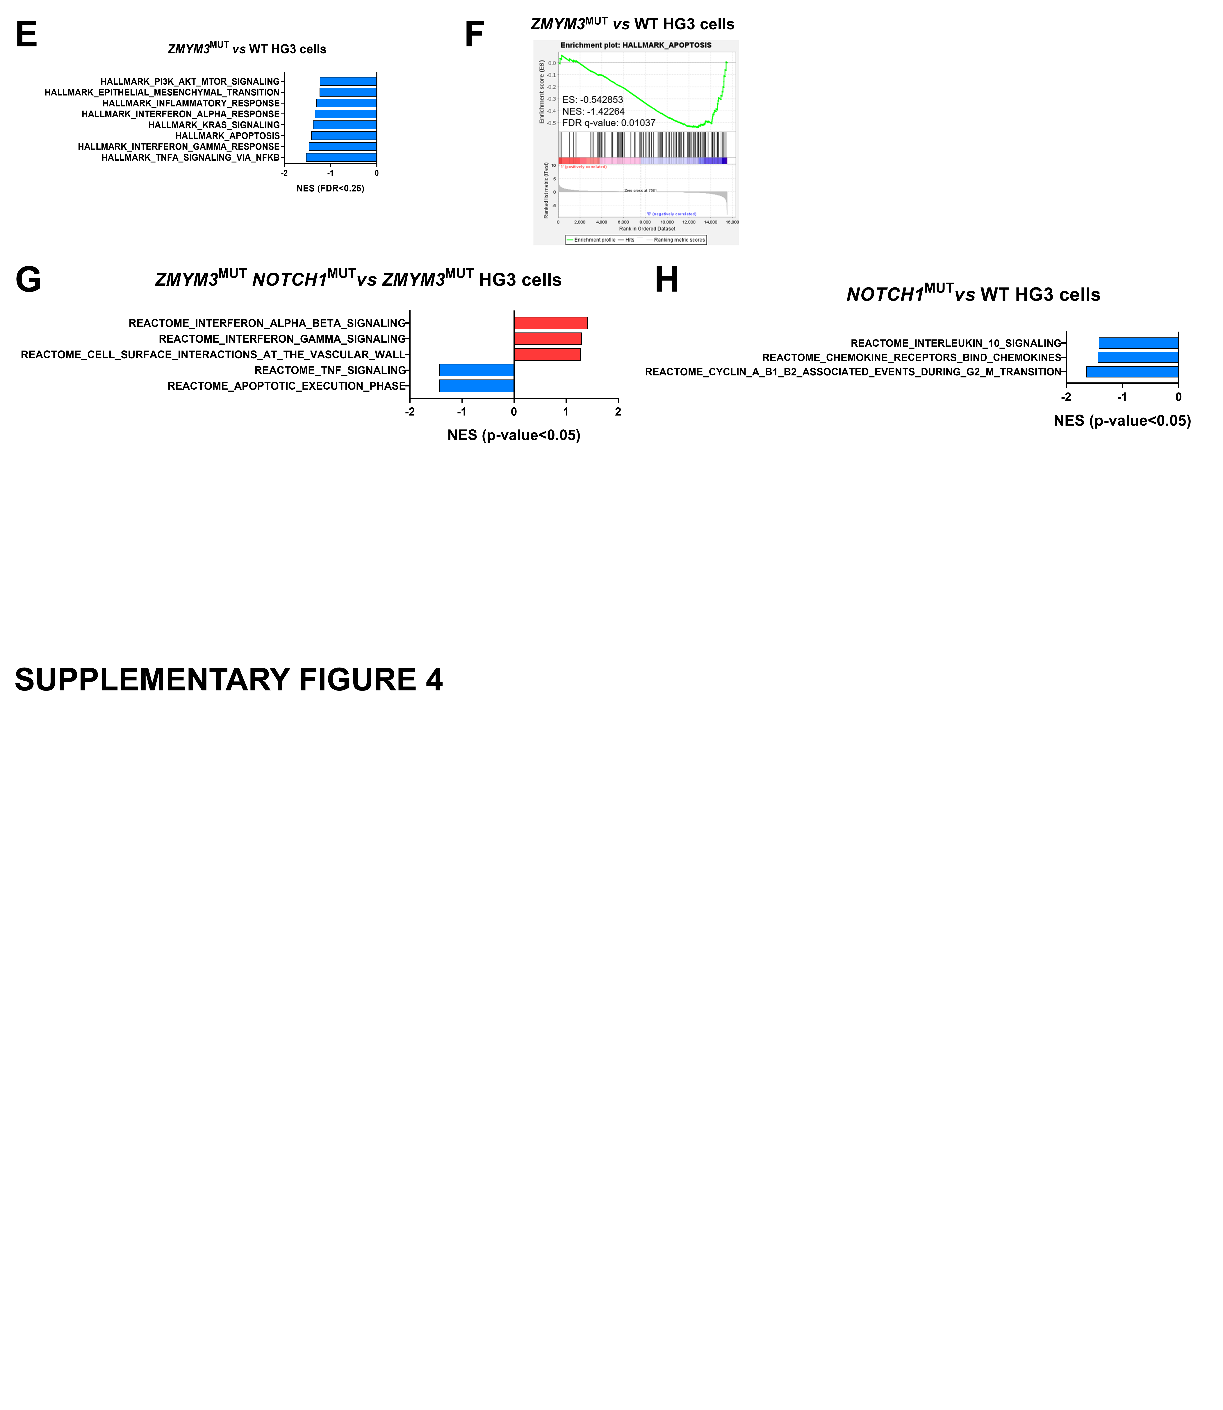
Supplementary Figure 4. RNA-seq analysis of CRISPR/Cas9-edited CLL models.**

**A.** Principal Component Analysis (PCA) of gene expression profiles in WT, *ZMYM3*MUT, *NOTCH1*MUT, *ZMYM3*MUT *NOTCH1*MUT cells HG3 cells, illustrating the relationship between samples. **B.** Heatmap illustrating differentially expressed genes (DEGs) (FDR<0.05, |fold change|>2) in *ZMYM3*MUT *NOTCH1*MUT cells compared to *ZMYM3*MUT (**left**)and *ZMYM3*MUT *NOTCH1*MUT *vs* *NOTCH1*MUT cells (**right**). **C.** Volcano plots showing upregulated and downregulated DEGs in *ZMYM3*MUT (**left**)and *ZMYM3*MUT *NOTCH1*MUT (**right**) compared to WT cells. **D.** Volcano plots representing upregulated and downregulated DEGs of *ZMYM3*MUT *NOTCH1*MUT cells relative to *ZMYM3*MUT (**left**)and *NOTCH1*MUT cells (**right**), respectively. **E.** Top Hallmark pathways significantly downregulated in *ZMYM3*MUT compared to WT cells. **F**. GSEA of Hallmark apoptosis gene set comparing *ZMYM3*MUT *vs* WT cells. **(G, H)**. GSEA of Reactome pathways identifying significantly enriched pathways in *ZMYM3*MUT *NOTCH1*MUT *vs* *ZMYM3*MUT (**G**) and *NOTCH1*MUT *vs* WT cells (**H**).


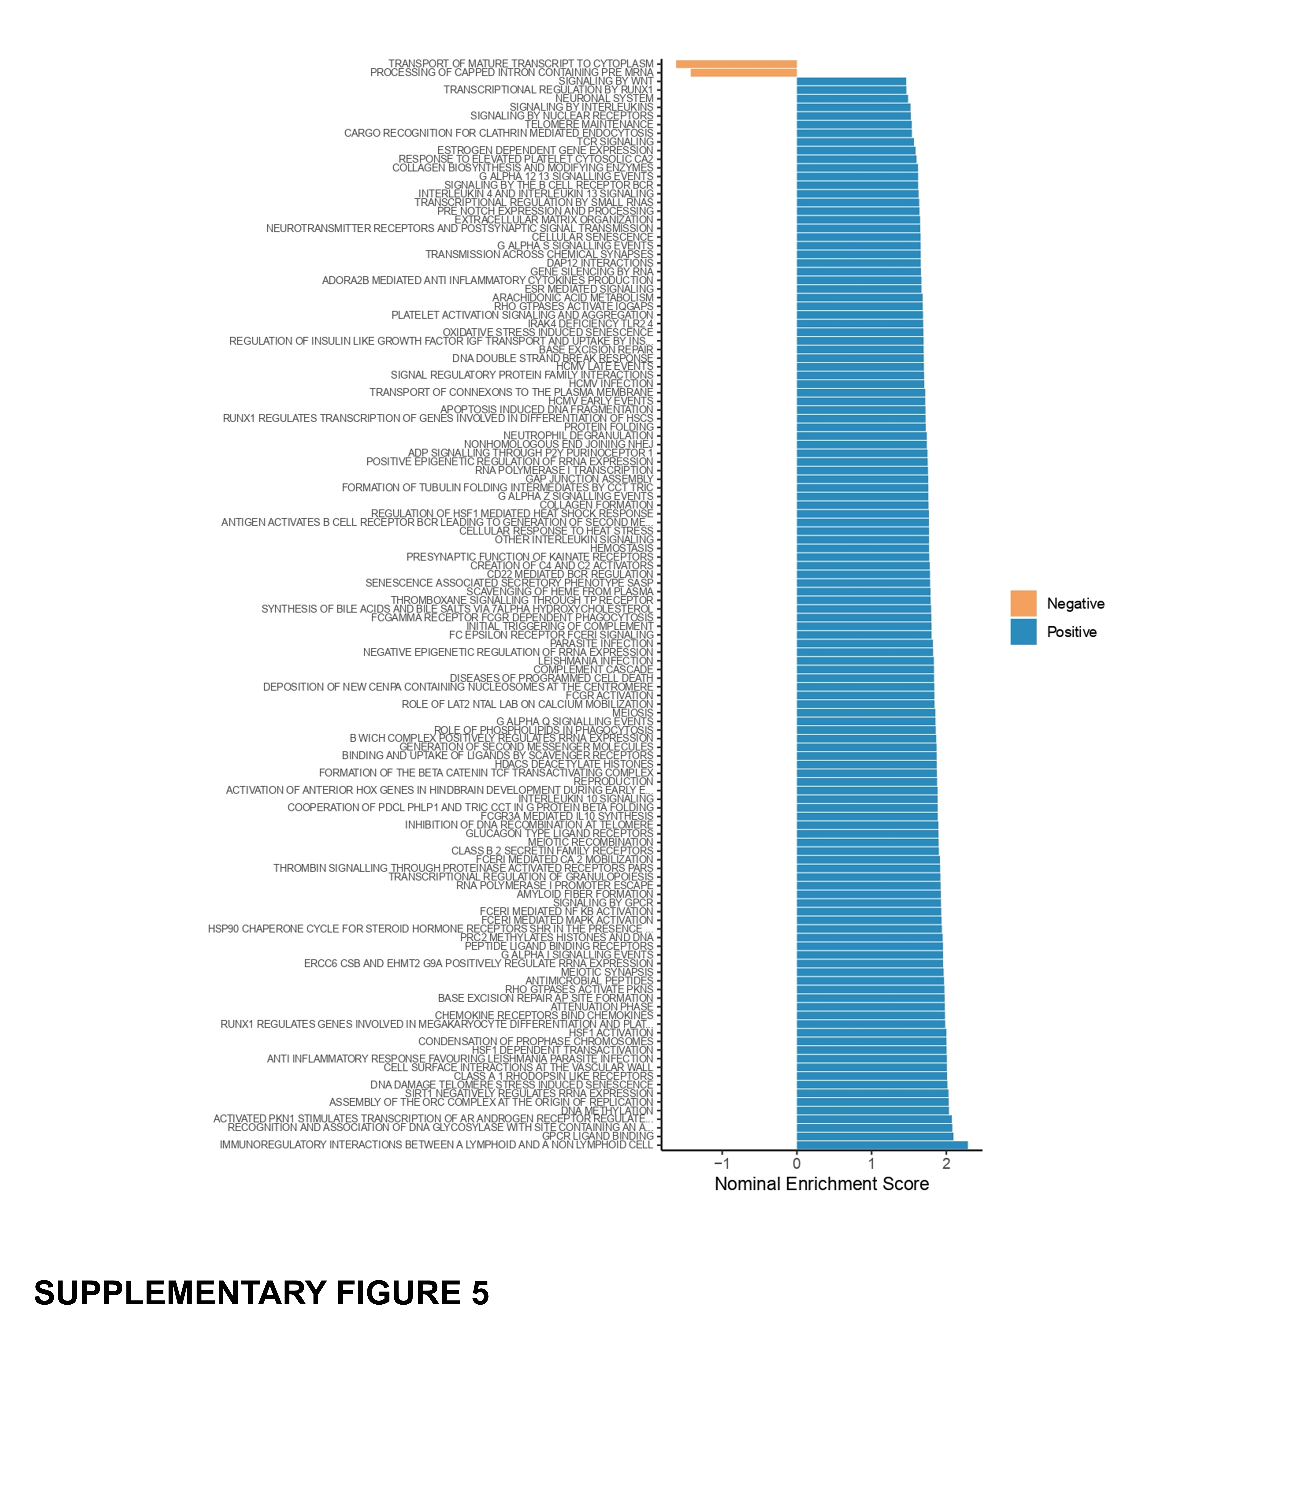


**Supplementary Figure 5**. **RNA-sequencing of CLL patients from the Salamanca cohort.**

Bar plot depicting Reactome pathways significantly enriched in *ZMYM3*-mutated *vs* WT CLL patients from the Salamanca cohort (control, n=5; *ZMYM3*-mutated, n=5). Pathway enrichment analysis highlights key biological processes and molecular mechanisms altered by *ZMYM3* mutations in CLL.


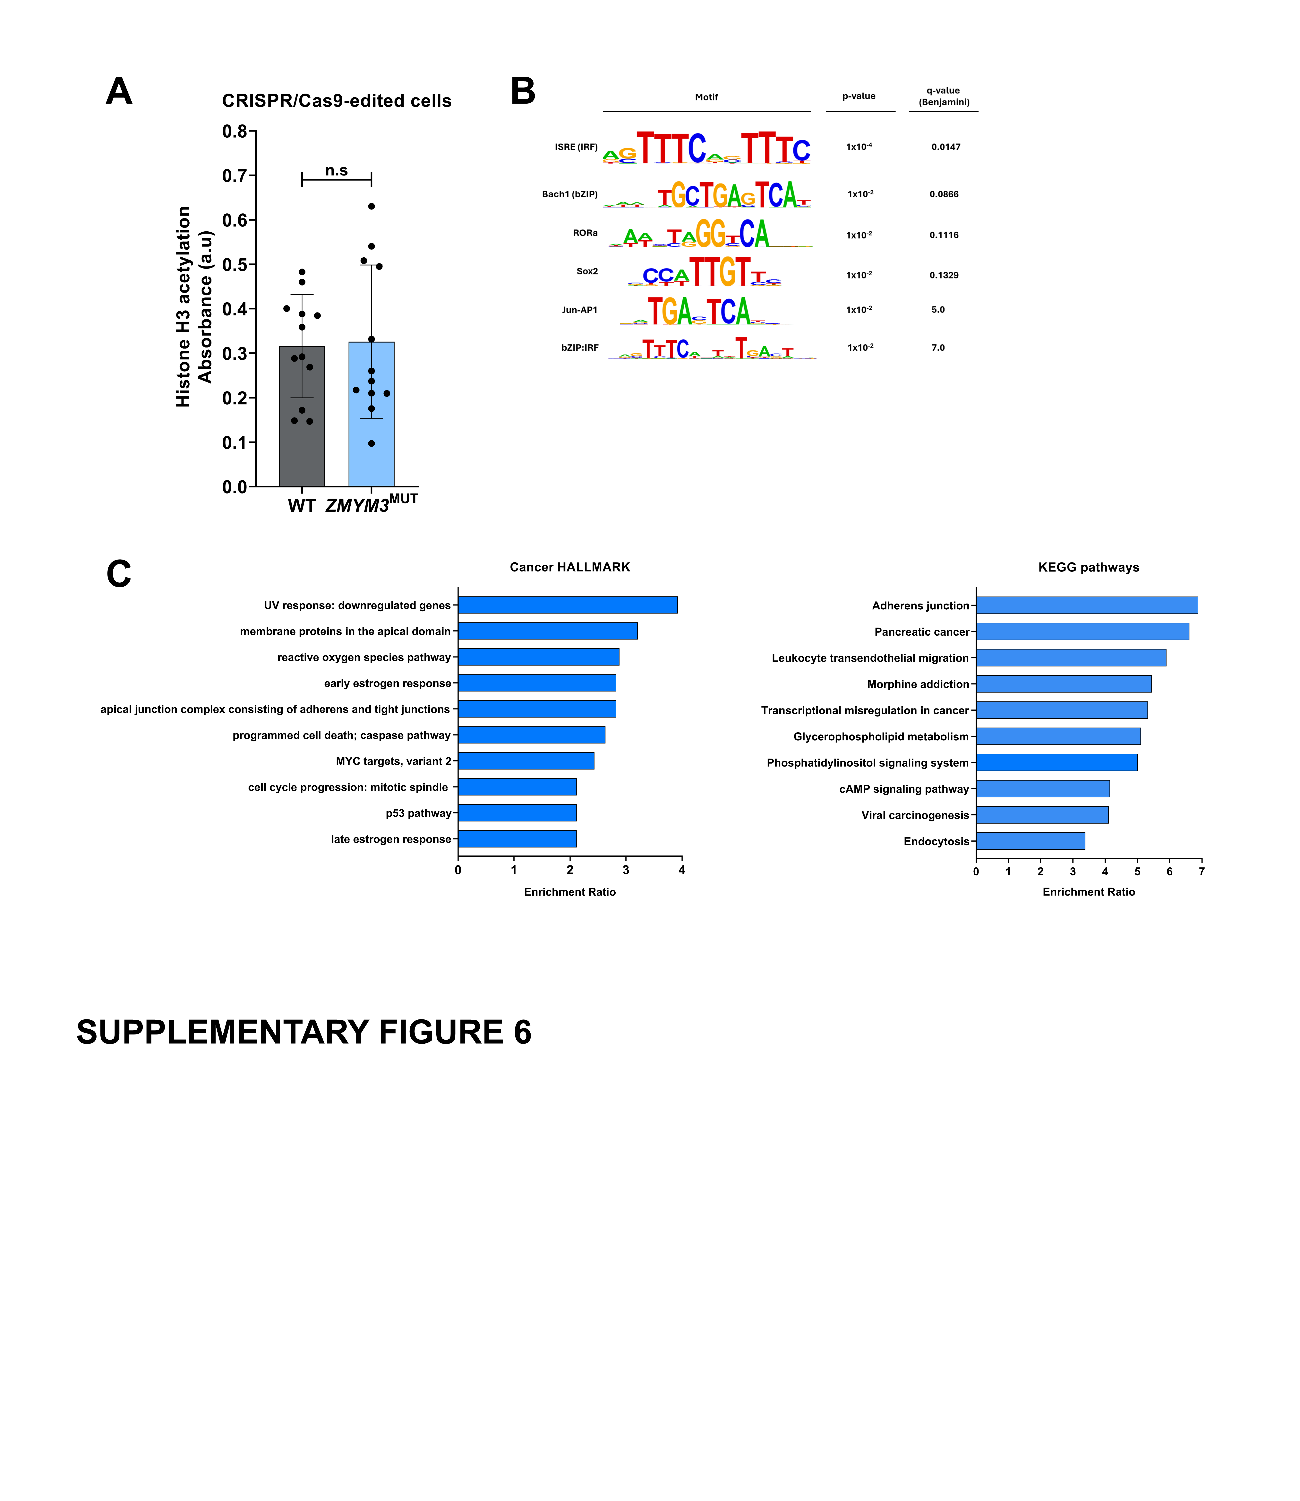


**Supplementary Figure 6**. ***ZMYM3*** **mutations modulate chromatin accessibility.**

**A.** Quantification of global histone H3 acetylation levels in CRISPR/Cas9-edited cells: WT (n=3) and *ZMYM3*MUT cells (n=3) using a fluorometric assay. Data represent the mean of three independent experiments in four clones. (n. s): not significant.

**B.** DNA motifs enriched in open chromatin regions shared between *ZMYM3*MUT and *ZMYM3*MUT *NOTCH1*MUT cells identified by HOMER known motif analysis.

**C.** Top enriched pathways for downregulated genes in *ZMYM3*MUT *NOTCH1*MUT cells, identified through integrative analysis of ATAC-seq and RNA-seq data. Pathway enrichment analysis is shown for Hallmark (**left**) and KEGG pathways (**right**).


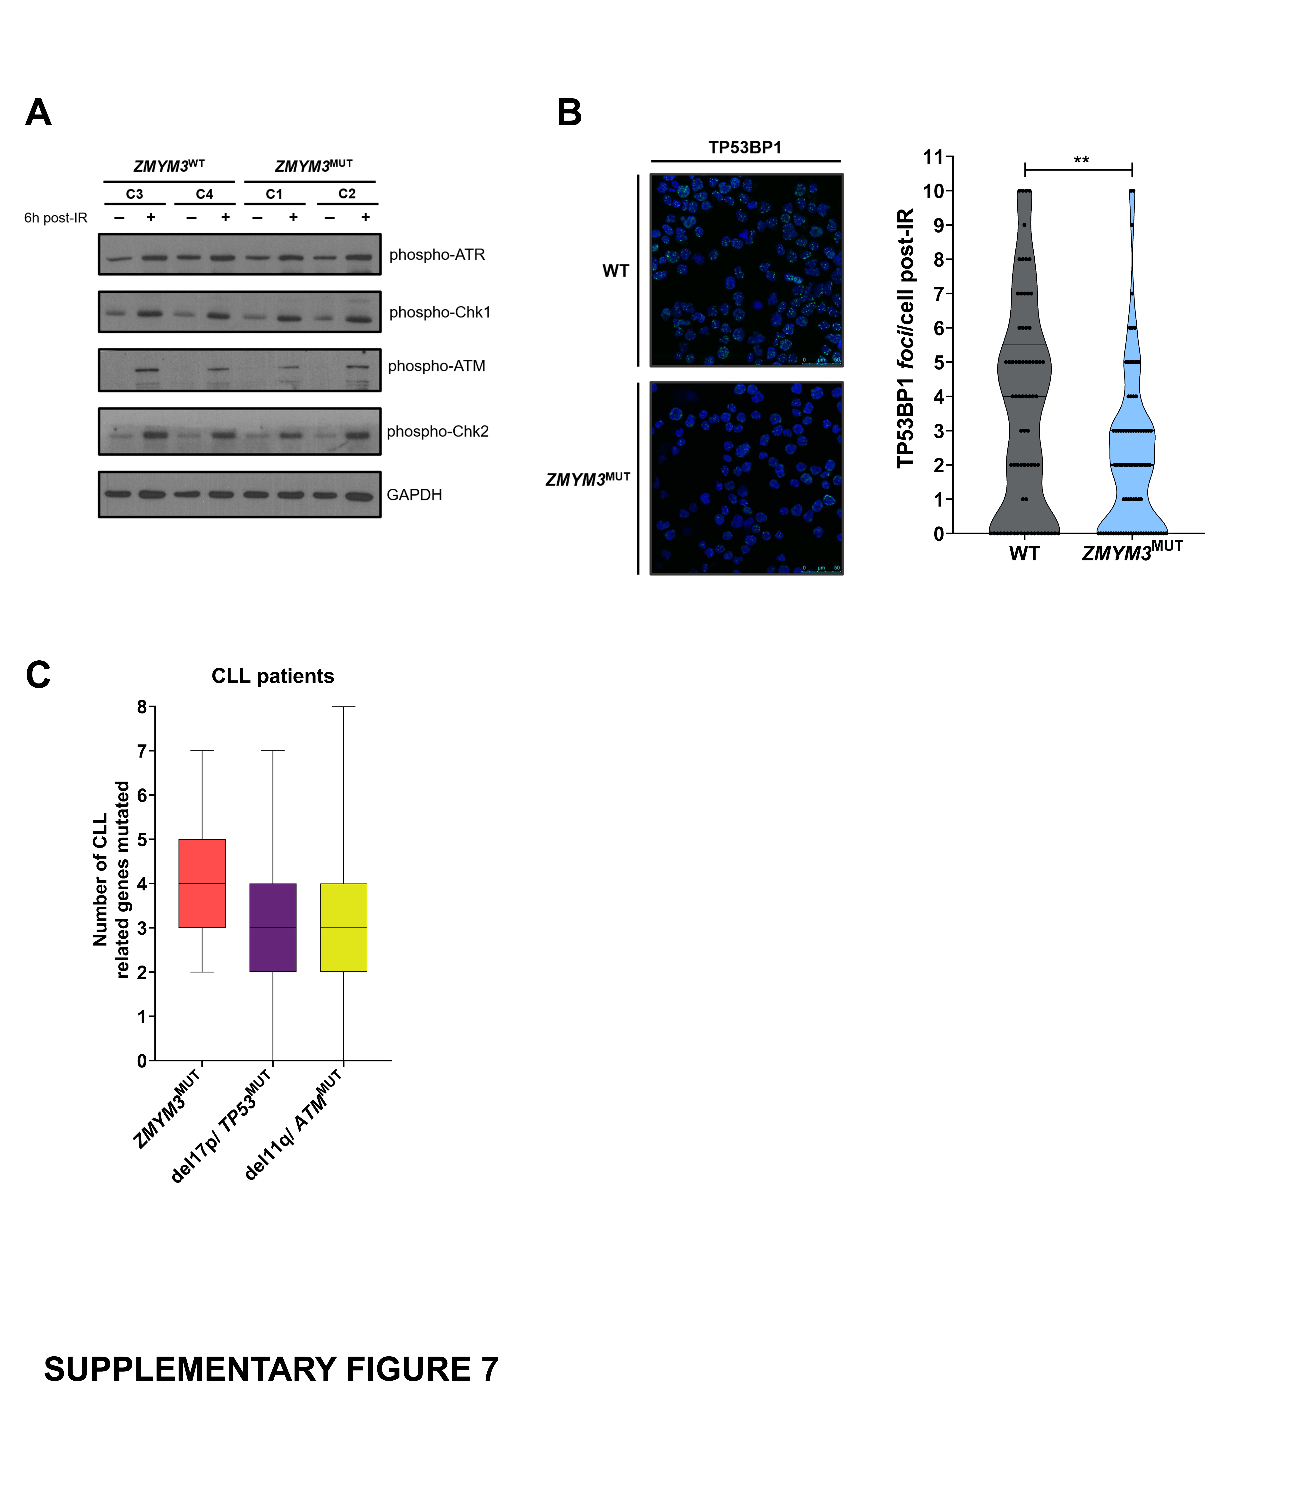


**Supplementary Figure 7. *ZMYM3* mutations impair DNA damage response.**

**A.** Western blot analyses depicting the phosphorylated forms of ATR, CHK1, ATM and CHK2 proteins, indicating the activation status of these DDR kinases.

**B.** Immunofluorescence analysis quantifying TP53BP1 *foci*/cell. Quantification was performed on at least 100 cells per condition in two different clones per condition.

**C.** Number of mutations detected in any of the 54 CLL-related genes observed in the *ZMYM3*MUT (n=30), *TP53*MUT and del17p (n=95) and *ATM*MUT and del11q (n=99) subgroups.


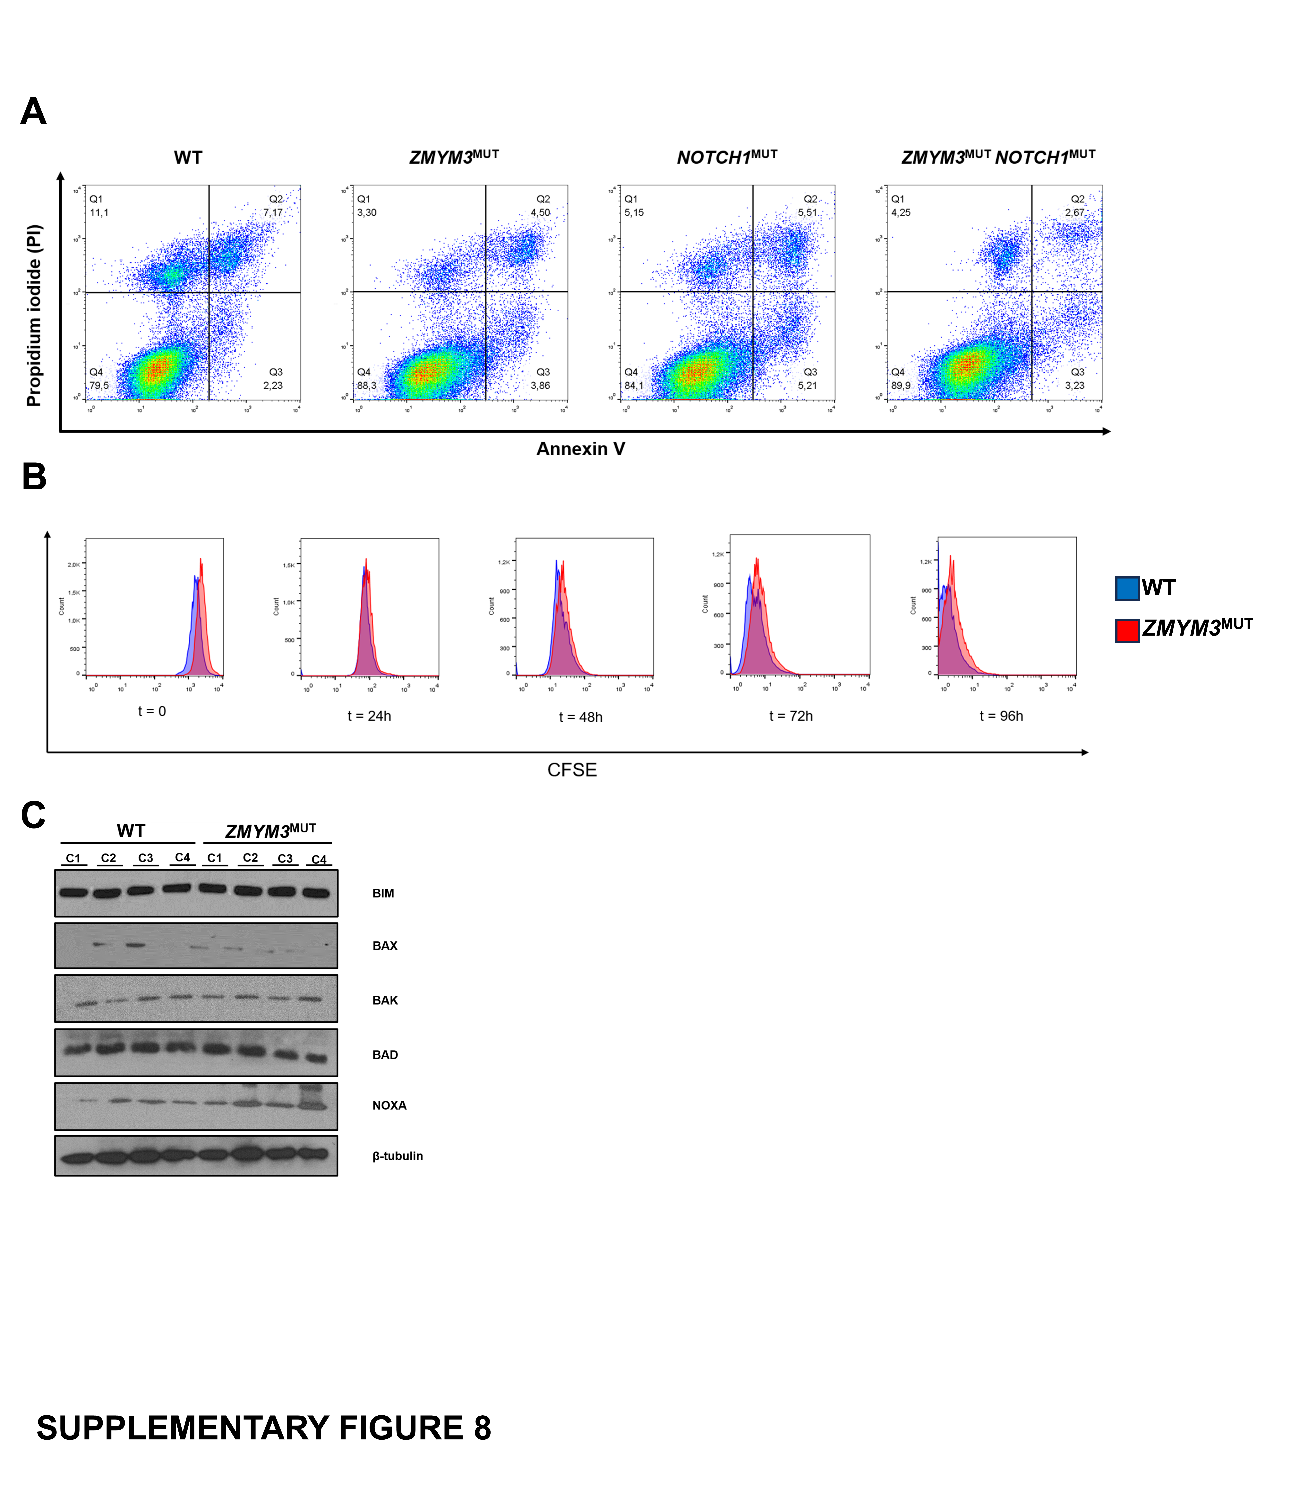


**Supplementary Figure 8. *ZMYM3* mutations impact apoptosis of CLL cells.**

**A.** Representative flow cytometry plots depicting annexin V/PI staining of WT (n=3), *ZMYM3*MUT (n=4), *NOTCH1*MUT (n=3), *ZMYM3*MUT *NOTCH1*MUT (n=3) cells after 48 hours. Dead cells by apoptosis, identified as annexin V+ PI+, were quantified. The experiment was independently performed four times.

**B.** CFSE staining was employed to assess growth rates of WT and *ZMYM3*MUT cells over 96 hours.

**C.** Western blot analyses illustrating the expression of pro-apoptotic proteins in WT and *ZMYM3*MUT HG3 cells.


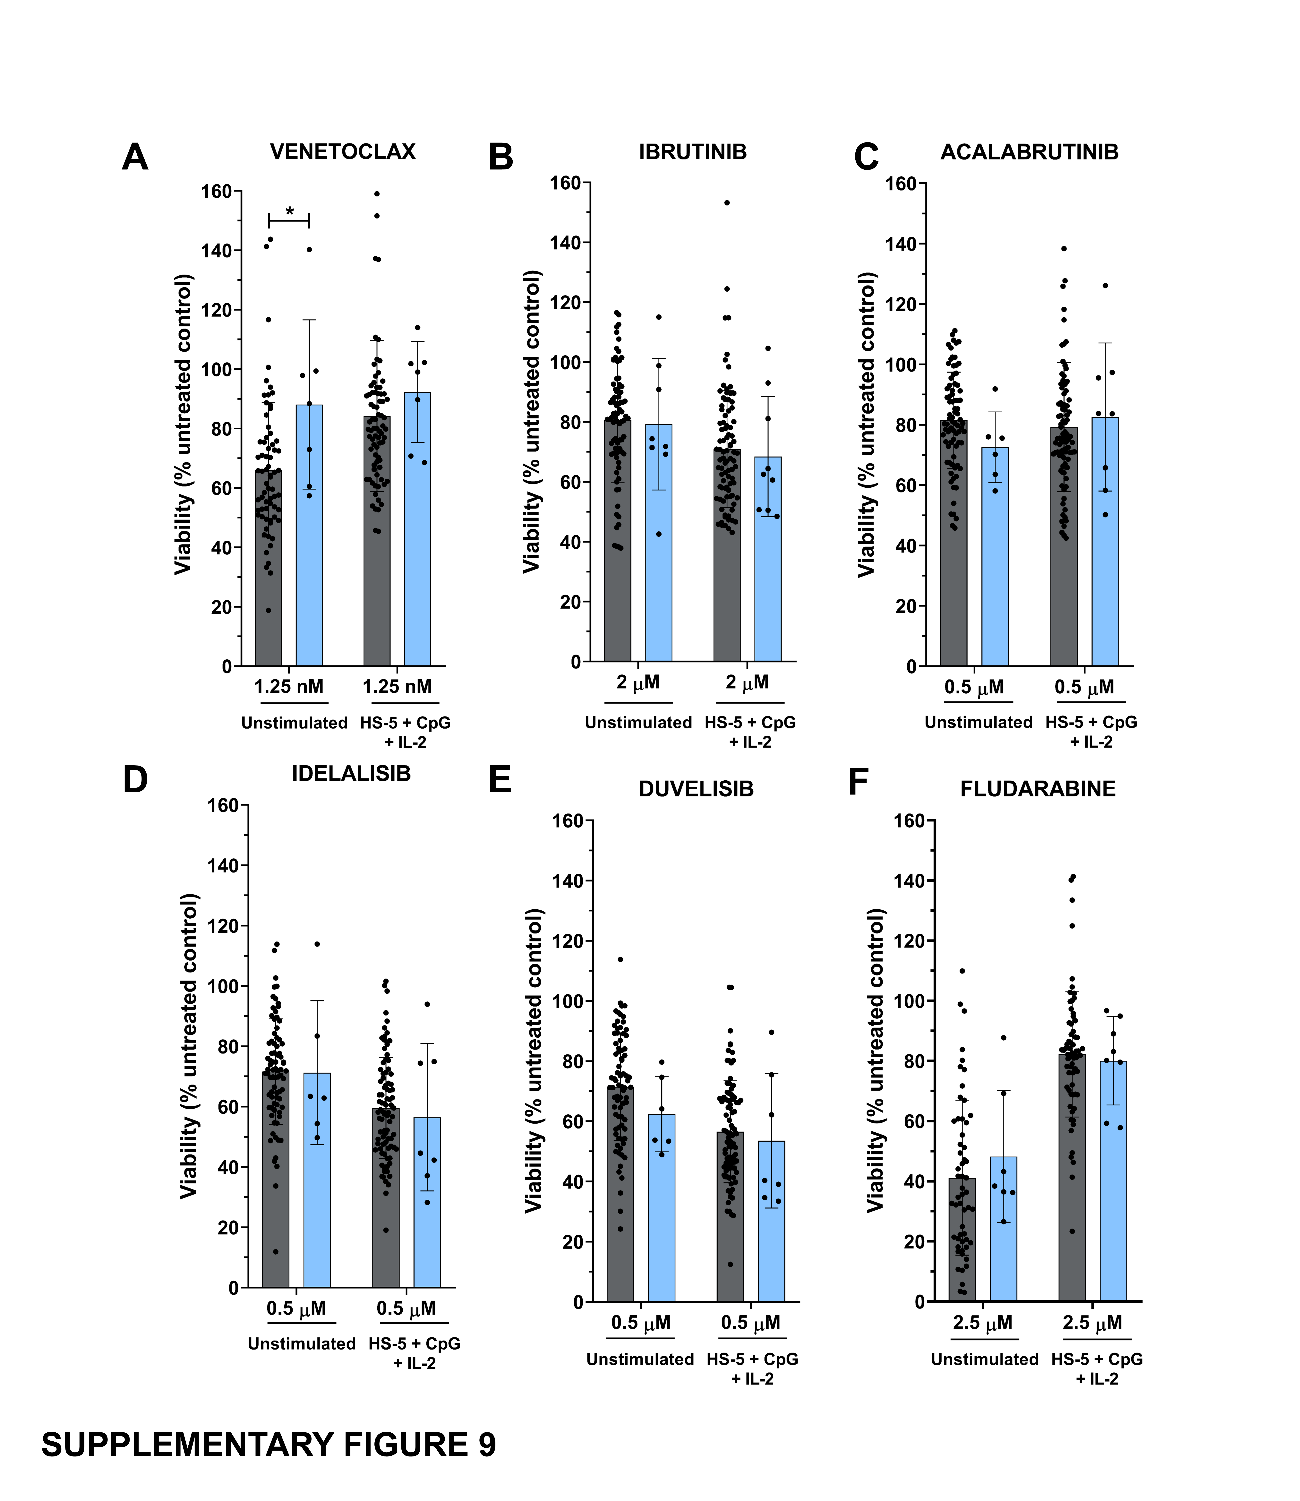


**Supplementary Figure 9. Impact of *ZMYM3* mutations on the response of primary CLL samples to treatment.**

Primary CLL cells were cultured in monoculture (unstimulated) or in the presence of HS-5 bone marrow stromal cells, 1.5 µg/ml CpG and 50 ng/ml IL-2 and treated with the indicated doses and drugs: venetoclax (**A**), ibrutinib (**B**), acalabrutinib (**C**), idelalisib (**D**), duvelisib (**E**) and fludarabine (**F**). Normalized surviving fraction is calculated relative to untreated cells. Data are presented as the mean ± SD.

**
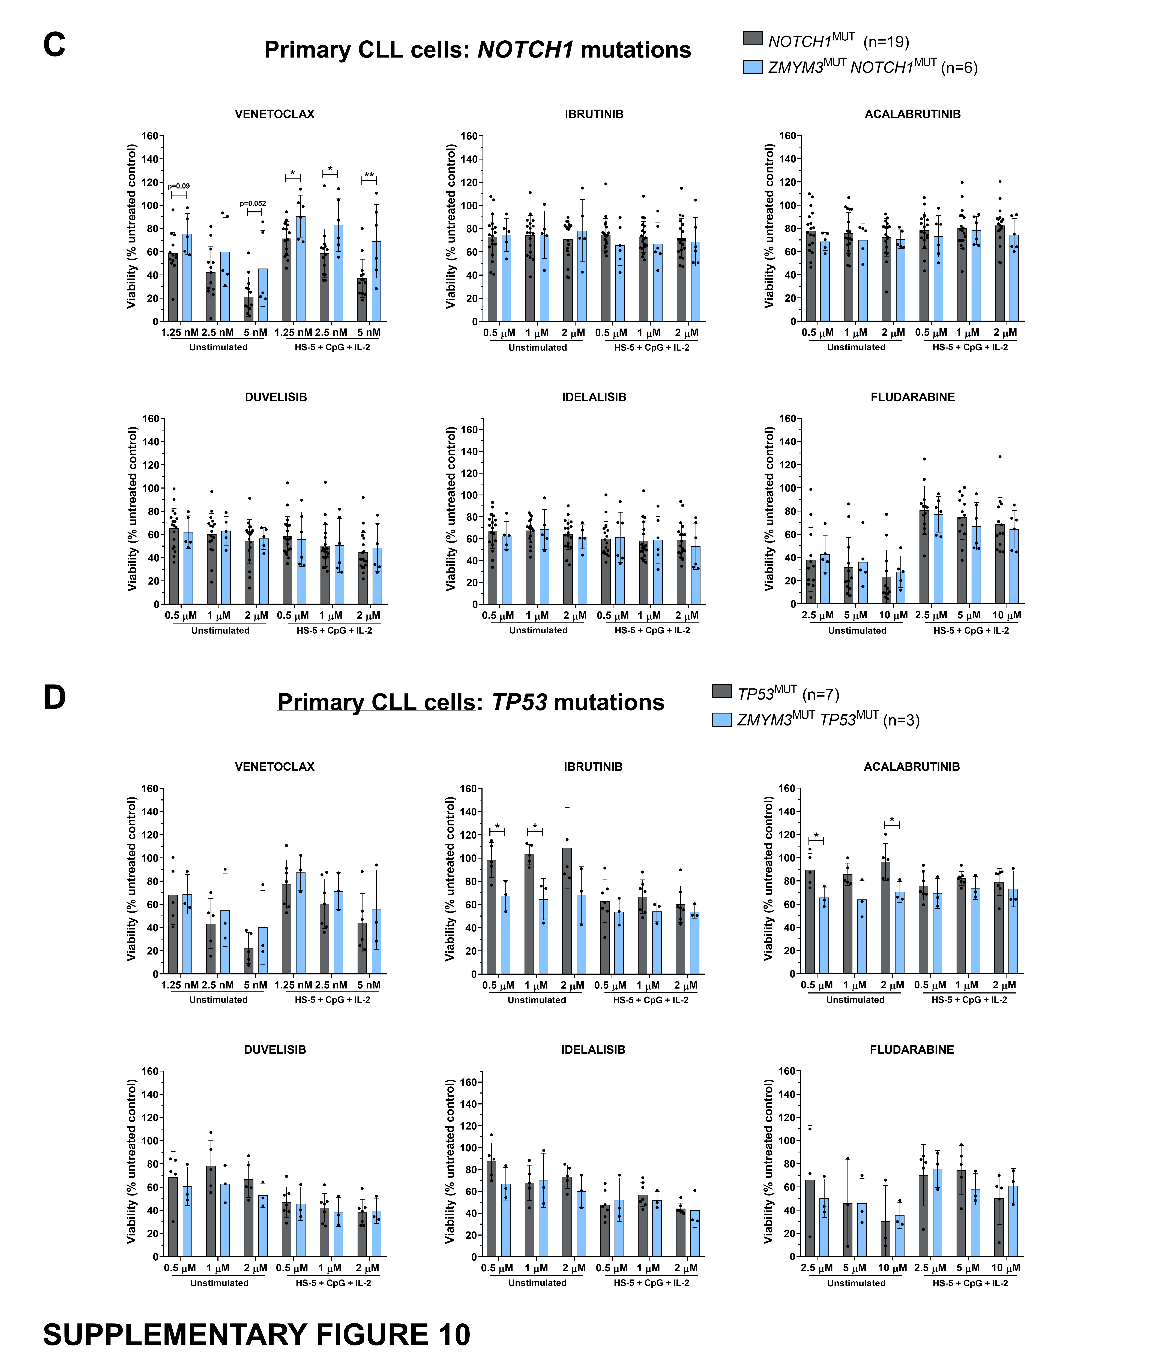

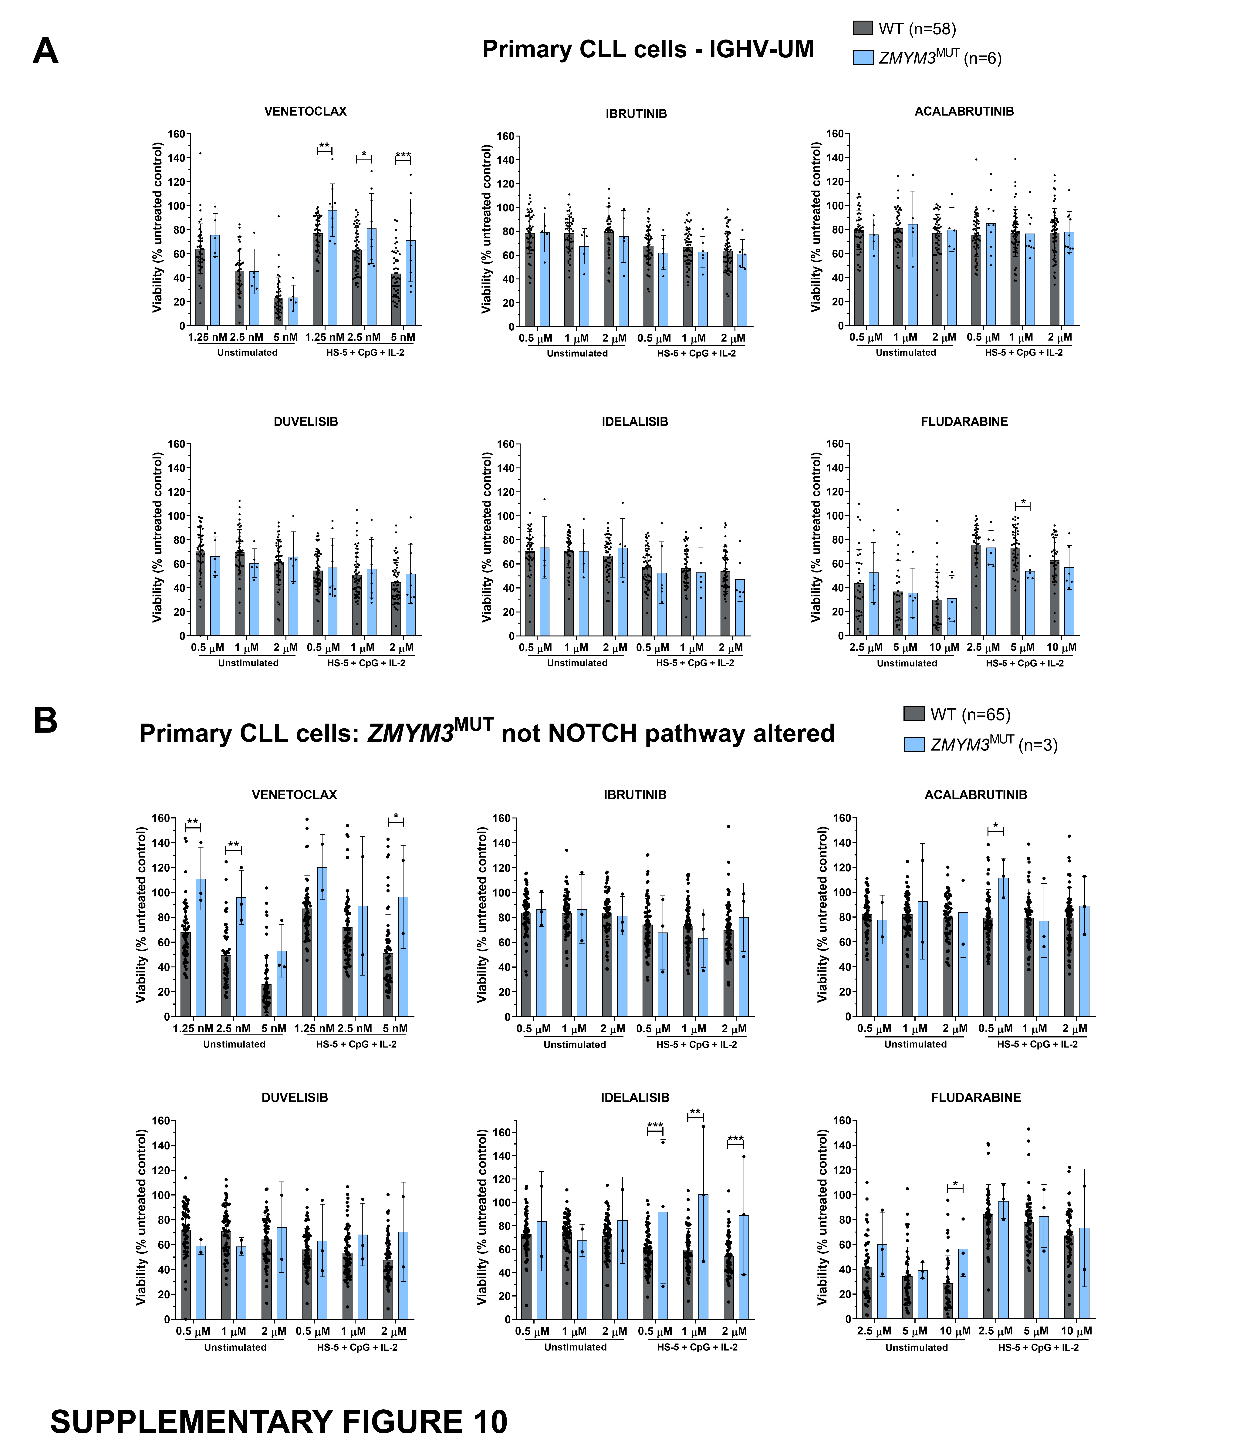
**

**
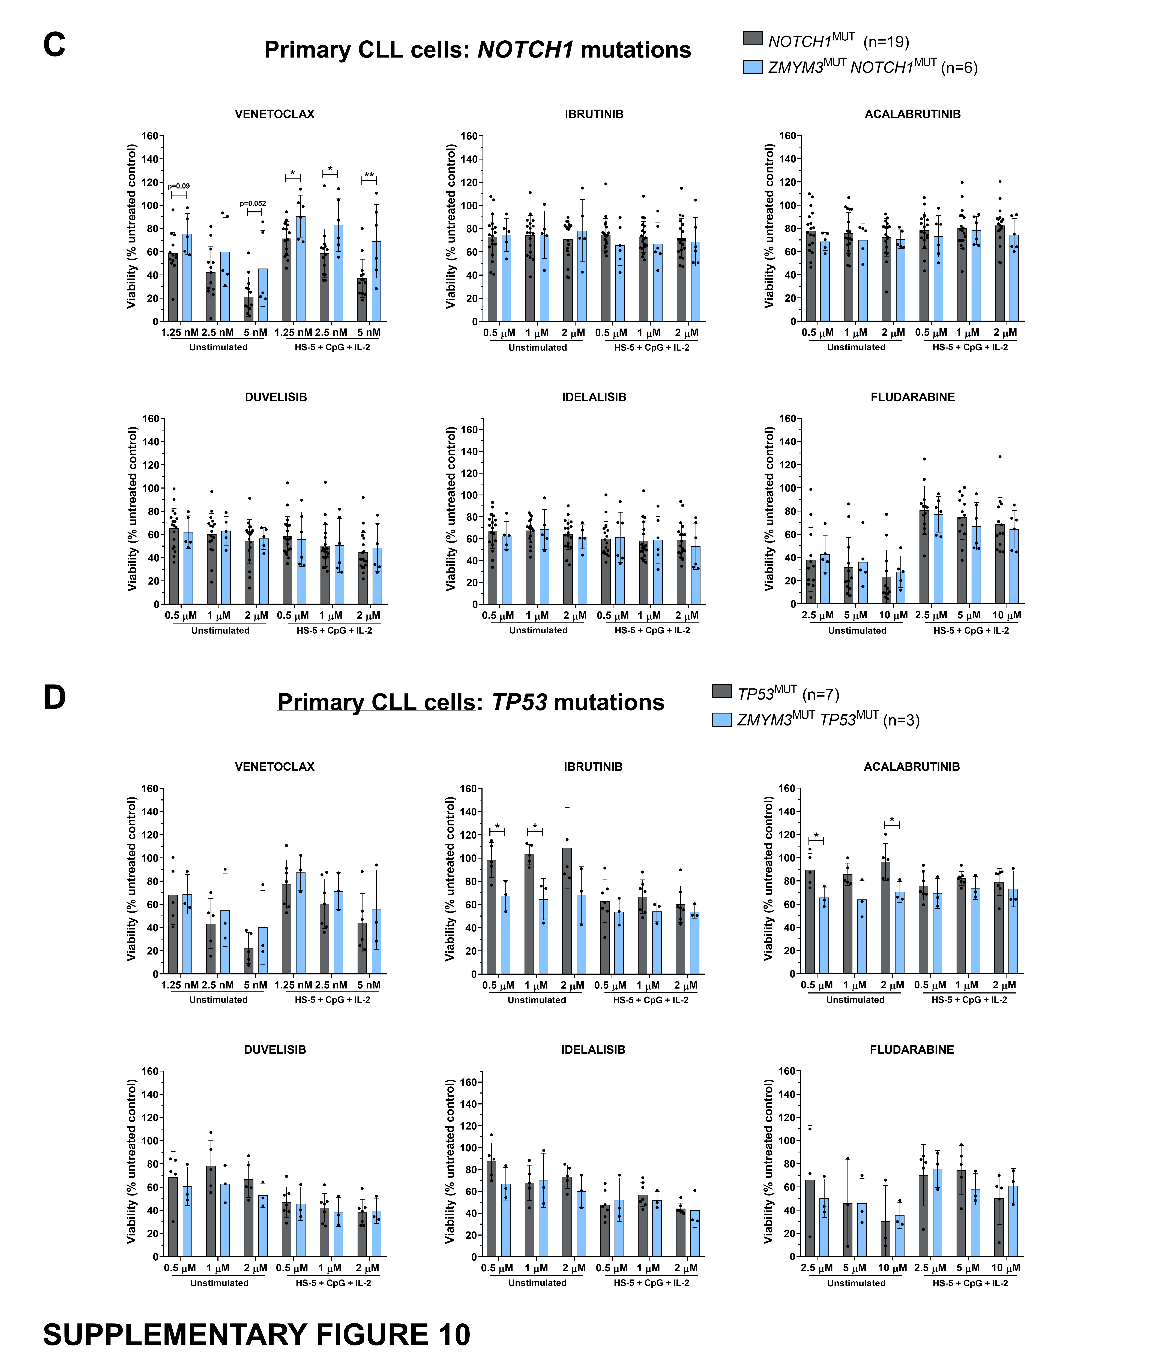
**

**Supplementary Figure 10. Impact of *ZMYM3* mutations on therapy response in CLL primary samples.**

Primary CLL cells were cultured in monoculture (unstimulated) or in the presence of HS-5 bone marrow stromal cells, 1.5 µg/ml CpG and 50 ng/ml IL-2 to mimic the tumor microenvironment. Cells were then treated with the indicated doses and drugs across different genetic subgroups:

**A.** CLL samples with unmutated IGHV (IGHV-UM).

**B.** CLL samples *NOTCH1* wild-type status.

**C.** CLL samples with *NOTCH1*-mutated.

**D.** CLL samples with *TP53*-mutated.


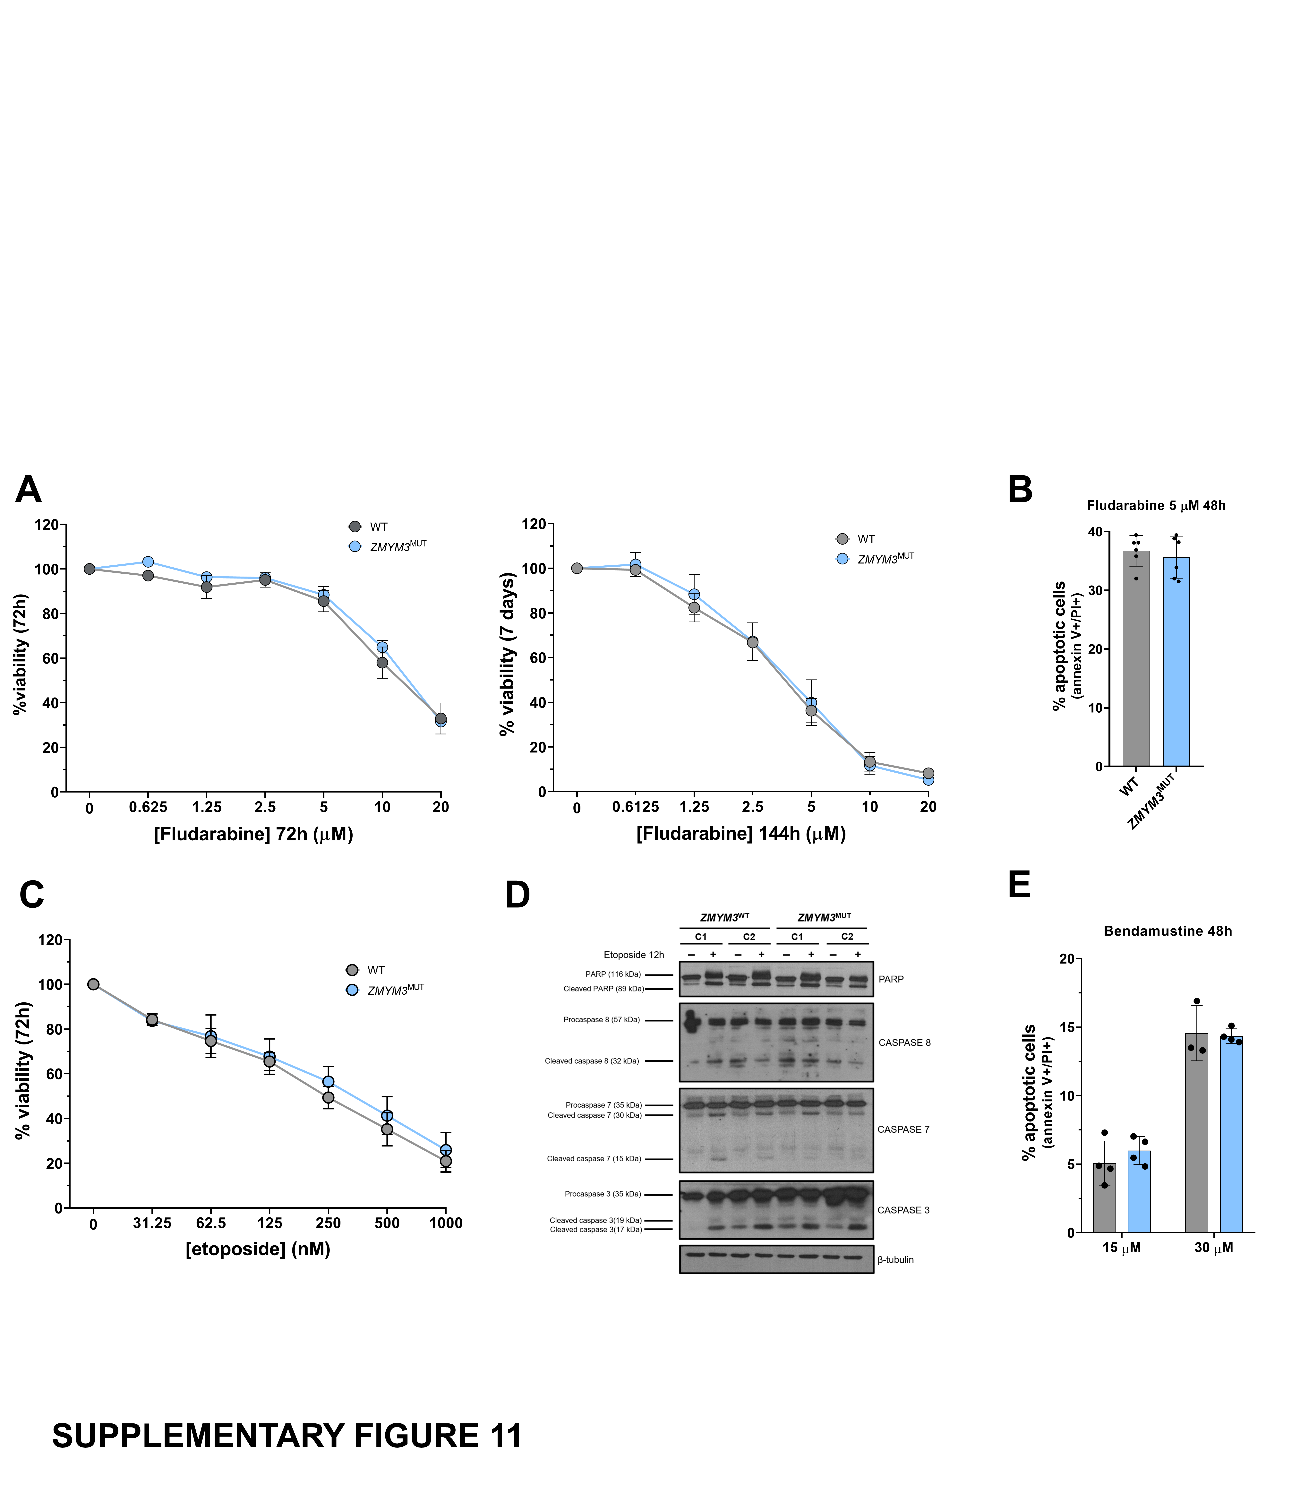


**Supplementary Figure 11. Response of CRISPR/Cas9-edited HG3 cells to chemotherapeutic agents.**

**A.** HG3 cells were treated with the indicated escalating doses of fludarabine under short-term (3 days) and long-term cultures (7 days). Viability was determined by MTT assay, with the surviving fraction expressed relative to untreated (DMSO) controls. Data are presented as the mean ± SD from three independent experiments. **B.** Apoptosis induction by fludarabine treatment (48 hours) was assessed by annexin V/PI staining. Graph shows the percentage of annexin V+/PI+ apoptotic cells. 2 independent experiments were performed. **C.** HG3 cells were treated with the indicated doses of etoposide for 72 hours. Viability was determined by MTT assay, with the surviving fraction expressed relative to untreated (DMSO) controls. Data are presented as the mean ± SD from three independent experiments. **D.** Western blot analyses of the expression of PARP, caspase-8, caspase-7 and caspase-3 after treatment with etoposide for 12 hours. **E.** Apoptosis induction by bendamustine treatment (48 hours) was evaluated using annexin V/PI staining. Graph shows the percentage of annexin V+/PI+ apoptotic cells. 2 independent experiments were performed.
